# Supplementary material for: COVID-19 Information Overload, Negative Emotions and Posttraumatic Stress Disorder: A Cross-Sectional Study
Source: Front Psychiatry. 2022 May 13;13:894174. doi: 10.3389/fpsyt.2022.894174 (PMC9186157; doi:10.3389/fpsyt.2022.894174)
Supplement: Supplementary file 1 [file Table_1.XLSX]

## Sheet: 信息过载数据库
gender	age1	edu	neighborhood infected by COVID-2019	In the last month, have you received so much information about the pandemic that it has "overwhelmed" you?	In the last month, did you forget to reply to a very important message?	In the last month, have you felt that you have to constantly refresh of search COVID-2019 related information?	In the last month, did you receive more COVID-2019 information than you could handle?	In the last month, do you have to spend more time maintaining your communication devices in order to receive information?	In the last month, have you feel stressed because you received a lot of information related to the pandemic from different sources in a short period of time?	In the last month, have you feel that the COVID-2019 information you received at once was more than you could handle?	infor	Feeling nervous or anxious	Unable to stop worrying	Worrying too much about various things	Feeling it is hard to relax yourself	Unable to meditation due to restlessness	Feeling easily annoyed or impatient	Feeling worried because something terrible seems to be going to happen	GAD	Feeling unmotivated or uninterested in what you are doing in the last two weeks	Feeling down, frustrated or hopeless in the last two weeks	Difficulty in falling asleep, sleeping restlessly, or sleeping excessively	Feeling fatigue in the last two weeks	You have lost your appetite or eaten too much in the last two weeks	You feel bad about yourself, or feel like a failure in the last two weeks	You have trouble focusing on things, such as reading the newspaper or watching TV in the last two weeks	People can notice that you are talking or moving significantly slower than before, or conversely, you seem more irritable than usual in the last two weeks	You sometimes think it's better to die or you have the thoughts to hurt yourself in the last two weeks	PHQ	Did the pandemic has brought back uncomfortable memories, thoughts or images to you repeatedly?	Did the pandemic caused you recurring nightmares?	Did you feel as if the pandemic has broken out again or gotten worse?	Did you feel restless if something remind you about the pandemic?	Did you feel somatic discomfort if something remind you about the pandemic?	Did you try to avoid thinking of or talking past experience about the pandemic?	Did you try to avoid participating in the events that remind you about the pandemic?	Did you have trouble remembering important information about the pandemic?	Did you loss interest in things you used to enjoy?	Did you feel alienate from others?	Did you feel emotional numbness?	Did you feel uncertain about you future?	Did you have trouble to fall asleep, or easily to wake up?	Did you feel that you are more easily to lose your temper than before?	Did you have trouble to concentrate?	Did you are very alert?	Did you feel easily frightened?	PCL	IO1	IO2
2	1	3	2	2	2	2	2	2	2	2	7	2	1	1	2	2	2	2	5	2	2	2	2	2	2	2	2	2	9	2	2	2	2	2	2	2	2	2	2	2	2	2	2	2	2	2	34	6	4
2	1	3	2	1	1	3	1	3	3	2	7	1	1	1	1	1	1	1	0	1	1	1	1	1	1	1	1	1	0	1	1	2	1	1	2	2	1	1	1	1	1	1	1	1	1	1	20	6	4
1	1	2	2	1	1	1	1	1	1	1	0	1	1	1	1	1	1	1	0	3	1	3	2	1	2	1	1	1	6	1	1	1	1	1	1	1	1	1	3	1	1	1	1	1	1	1	19	3	2
2	1	3	2	3	2	3	2	3	3	2	11	1	2	1	1	1	2	2	3	3	2	2	2	3	3	2	2	2	12	3	2	3	2	2	1	1	1	2	2	2	3	2	2	2	2	2	34	8	5
2	1	3	2	3	3	3	3	2	3	2	12	2	2	4	2	3	3	2	11	2	1	4	4	3	2	4	4	1	16	2	1	1	1	1	2	1	1	1	2	1	5	5	5	5	1	2	37	8	5
2	1	3	2	2	2	3	2	2	2	2	8	2	2	1	1	1	1	2	3	3	2	4	3	2	1	1	1	1	9	1	1	2	2	1	1	1	1	1	1	1	1	4	1	1	1	2	23	6	4
2	1	3	2	2	1	3	3	1	2	2	7	2	2	1	1	1	1	2	3	2	1	2	2	1	1	1	1	1	3	1	1	2	2	1	1	1	1	1	2	1	2	2	1	1	2	1	23	6	2
1	1	3	1	2	3	3	2	3	3	2	11	2	1	1	2	1	2	2	4	2	2	2	2	1	1	1	1	1	4	1	1	2	1	1	1	1	1	1	1	1	2	1	1	1	1	1	19	7	6
1	1	3	1	3	2	3	3	2	3	2	11	2	2	3	3	1	2	2	8	3	2	3	3	3	1	2	2	1	11	2	2	3	1	1	1	2	2	1	2	1	1	4	2	2	4	1	32	8	4
2	1	3	2	2	2	2	2	3	2	2	8	2	2	2	2	2	2	1	6	1	2	1	1	1	1	1	1	1	1	1	1	1	1	1	1	1	1	1	1	1	1	1	1	1	1	1	17	6	5
2	1	3	2	3	2	3	2	1	2	2	8	1	2	2	2	1	1	2	4	1	2	3	1	2	1	1	1	1	4	2	1	2	2	1	1	1	3	2	1	1	2	2	1	3	1	1	27	7	3
2	1	3	2	3	3	3	2	2	2	2	10	1	1	1	1	1	2	1	1	2	1	1	1	2	2	3	3	1	7	1	1	1	2	1	1	1	1	2	2	1	3	4	2	2	3	1	29	7	5
2	1	3	2	3	4	4	5	4	5	5	23	2	1	1	2	2	2	2	5	2	2	3	3	3	2	3	2	2	13	2	2	3	2	1	1	1	1	3	2	2	3	4	2	2	1	2	34	13	8
2	1	3	2	4	5	2	2	2	2	2	12	2	2	1	3	1	2	2	6	3	2	3	2	2	2	3	3	1	12	2	1	1	1	1	1	1	1	2	3	2	4	5	4	4	2	4	39	8	7
2	1	3	2	3	2	4	2	2	2	2	10	1	1	1	1	1	1	1	0	1	1	1	1	1	1	1	1	1	0	1	1	1	1	1	1	1	1	1	1	1	1	1	1	1	1	1	17	7	4
2	1	3	2	3	1	3	3	2	3	2	10	2	2	2	1	1	1	2	4	2	1	1	1	2	1	1	1	1	2	2	1	2	2	1	1	1	1	1	1	1	1	1	1	1	3	2	23	8	3
2	1	3	2	1	1	1	1	1	1	1	0	2	1	1	1	1	1	1	1	2	2	2	2	2	1	1	1	1	5	1	1	1	1	1	1	1	1	1	1	1	1	1	1	1	1	1	17	3	2
2	1	3	2	3	1	3	3	2	2	2	9	2	2	2	1	1	2	1	4	2	2	2	2	2	1	1	1	1	5	1	1	1	2	1	1	1	1	1	1	1	2	2	1	1	1	1	20	7	3
2	1	3	2	1	1	3	1	1	1	1	2	1	1	1	1	1	1	1	0	1	1	1	1	1	2	1	1	1	1	1	1	1	1	1	1	1	1	1	1	1	1	1	1	1	1	1	17	3	2
2	1	3	2	1	1	1	1	1	3	1	2	2	1	2	2	2	2	2	6	2	2	2	3	2	2	2	2	1	9	2	1	2	3	1	1	1	1	1	1	1	2	2	1	2	3	1	26	5	2
2	1	3	2	1	1	1	1	1	3	1	2	2	2	1	1	1	2	1	3	2	1	1	1	4	1	1	1	1	4	1	1	1	1	1	1	1	1	1	1	1	1	3	1	4	1	1	22	5	2
2	1	3	1	2	2	3	3	2	2	2	9	2	2	2	2	2	2	2	7	2	2	2	2	1	2	2	2	2	8	2	2	2	2	1	1	1	1	2	1	1	1	2	2	3	2	1	27	6	4
2	1	3	2	3	4	5	4	5	5	4	23	2	2	2	3	2	2	2	8	3	2	3	2	3	2	3	2	1	12	2	2	1	2	1	2	1	2	2	2	2	2	3	3	2	1	3	33	12	9
1	1	3	2	2	2	2	2	2	2	2	7	1	1	1	1	1	1	1	0	1	1	1	1	1	1	1	1	1	0	1	1	1	1	1	1	2	1	1	1	1	1	1	1	1	1	1	18	6	4
2	1	3	2	4	3	5	4	3	5	3	20	2	2	2	2	2	2	2	7	1	2	2	2	1	1	2	1	1	4	2	1	2	2	2	1	1	1	2	2	1	2	3	3	2	1	2	30	12	6
2	1	3	2	2	1	1	1	1	1	1	1	1	1	1	1	1	1	1	0	1	1	1	1	1	1	1	1	1	0	1	1	1	1	1	1	1	1	1	1	1	1	1	1	1	1	1	17	4	2
2	1	3	2	3	3	4	3	5	5	5	21	3	3	3	3	3	4	3	15	4	4	4	3	2	3	2	2	1	16	3	1	3	3	2	2	2	1	3	4	2	5	5	4	3	3	4	50	13	8
2	1	3	2	1	1	1	1	1	1	1	0	1	1	1	1	1	2	2	2	1	1	1	1	2	1	1	1	1	1	1	1	1	1	1	1	1	1	1	1	1	1	1	1	1	1	1	17	3	2
2	1	3	2	1	2	1	1	1	1	1	1	1	1	1	1	1	1	1	0	1	1	1	1	1	1	1	1	1	0	1	1	1	1	1	1	1	1	1	1	1	1	1	1	1	1	1	17	3	3
1	1	3	2	2	3	4	2	2	2	2	10	2	2	3	3	2	3	2	10	2	1	1	2	1	1	2	2	1	4	1	1	1	1	1	1	1	1	2	1	1	3	1	3	3	2	1	25	6	5
1	1	3	2	3	2	4	3	2	3	3	13	2	2	4	2	1	2	2	8	2	2	2	2	2	2	2	1	1	7	2	1	2	3	2	2	2	1	2	2	1	2	2	2	2	3	2	33	9	4
1	1	3	2	3	2	3	2	3	3	3	12	2	2	2	2	1	2	2	6	2	2	2	2	1	2	1	1	1	5	2	1	2	2	2	1	1	1	1	1	1	2	1	1	2	2	2	25	9	5
1	1	3	2	3	3	3	2	2	2	2	10	2	2	2	2	2	2	2	7	2	2	1	1	1	1	1	1	1	2	1	1	1	1	1	1	1	1	1	2	1	2	1	1	1	1	1	19	7	5
2	1	3	2	3	1	3	2	2	3	1	8	1	1	1	1	1	2	1	1	1	2	1	2	2	1	1	1	1	3	1	1	1	2	1	1	1	1	1	1	1	1	1	2	1	1	1	19	7	3
2	1	3	2	3	3	4	3	5	3	3	17	3	2	3	2	2	3	2	10	2	1	2	3	2	2	2	1	2	8	2	2	1	2	2	3	3	1	1	1	1	3	3	2	2	3	2	34	9	8
2	1	3	2	2	3	4	2	4	3	3	14	2	2	2	2	2	2	2	7	2	2	2	2	2	2	2	2	1	8	2	1	2	2	1	2	2	2	2	2	2	2	1	2	2	1	2	30	8	7
2	1	3	2	1	3	4	1	4	3	1	10	2	2	3	3	2	2	1	8	4	4	4	4	2	1	2	2	1	15	2	4	1	2	2	3	3	1	1	3	2	4	5	3	2	1	2	41	5	7
2	1	3	2	3	3	3	3	4	4	3	16	2	2	2	2	1	1	2	5	3	2	3	3	3	2	3	2	1	13	2	1	2	2	1	2	1	2	2	1	1	2	4	2	4	2	1	32	10	7
2	1	3	2	3	2	3	3	3	3	3	13	2	2	3	2	2	3	1	8	2	2	2	2	2	3	3	2	1	10	2	1	2	2	2	2	2	2	3	1	1	1	3	3	3	3	3	36	9	5
1	1	3	2	3	2	3	3	3	3	3	13	2	1	1	1	1	1	1	1	1	1	1	1	1	1	1	1	1	0	2	1	3	2	2	1	1	1	1	2	1	1	1	1	1	1	1	23	9	5
2	1	3	2	2	2	3	3	3	2	3	11	2	1	1	1	1	1	1	1	1	1	1	1	1	1	1	1	1	0	1	1	1	1	1	1	1	2	1	1	1	1	1	1	1	1	1	18	7	5
2	1	3	2	1	2	3	3	3	2	2	9	2	1	3	1	1	1	1	3	2	1	3	2	3	1	3	2	1	9	1	1	2	1	1	1	1	1	2	2	1	1	4	3	4	2	3	31	5	5
1	1	3	2	1	1	1	1	1	1	1	0	1	1	1	1	1	1	1	0	1	1	1	1	1	1	1	1	1	0	1	1	1	1	1	1	1	1	1	1	1	1	1	1	1	1	1	17	3	2
2	1	3	2	5	4	5	5	4	4	4	24	4	4	4	4	4	4	4	21	4	4	4	4	4	4	4	3	3	25	3	3	4	4	5	3	3	3	5	2	3	5	5	5	5	5	5	68	13	8
2	1	3	1	3	1	4	4	2	1	2	10	3	2	2	1	1	1	2	5	1	1	2	2	1	2	1	1	2	4	1	1	3	2	1	1	1	1	1	1	1	2	2	1	1	1	1	22	6	3
2	1	3	2	2	2	2	2	2	2	2	7	1	1	1	1	1	1	1	0	2	1	1	1	1	1	1	1	1	1	1	1	1	1	1	1	1	1	1	1	1	1	1	1	1	1	1	17	6	4
2	1	3	2	4	3	4	3	3	3	3	16	2	2	2	2	2	3	2	8	2	2	3	3	3	2	3	2	1	12	3	2	2	2	2	1	1	1	1	2	2	2	3	2	2	2	3	33	10	6
2	1	3	2	1	1	2	1	1	1	1	1	1	1	1	1	1	1	1	0	1	1	1	1	1	1	1	1	1	0	1	1	1	1	1	1	1	1	1	1	1	1	1	1	1	1	1	17	3	2
1	1	3	2	3	2	3	3	2	2	2	10	1	1	1	1	1	1	1	0	1	1	1	1	1	1	1	1	1	0	1	1	1	1	1	1	1	1	1	1	1	1	1	1	1	1	1	17	7	4
1	1	3	2	2	2	2	2	1	3	2	7	2	1	1	2	2	2	1	4	2	3	4	3	4	3	4	2	1	17	2	1	2	2	1	1	1	1	1	1	2	3	5	4	4	2	4	37	7	3
2	1	3	1	3	2	2	3	3	3	3	12	2	1	1	1	1	1	1	1	1	1	1	1	1	1	1	1	1	0	1	1	1	1	1	1	1	1	1	1	1	1	1	2	1	1	1	18	9	5
2	1	3	2	3	1	2	2	2	3	2	8	2	1	1	2	1	2	1	3	4	2	4	4	4	3	2	1	1	16	3	2	1	2	2	1	2	1	1	3	3	3	5	2	2	1	1	35	8	3
2	1	3	2	1	1	2	1	1	1	1	1	1	2	2	1	1	1	2	3	2	1	2	2	2	1	1	1	1	4	1	1	1	1	1	1	1	1	1	1	1	1	2	1	1	1	1	18	3	2
1	1	3	2	4	2	3	3	2	2	1	10	2	1	1	1	1	2	1	2	1	1	3	3	2	1	3	1	1	7	1	1	1	1	1	1	1	1	1	1	1	1	3	1	3	1	1	21	7	4
1	1	3	2	2	3	2	3	2	2	2	9	2	2	4	2	1	1	1	6	4	4	4	4	4	4	4	4	3	26	1	1	3	1	1	1	1	1	2	2	5	5	5	4	5	3	2	43	6	5
2	1	3	2	2	2	3	2	2	2	2	8	1	1	1	2	1	1	1	1	3	1	1	3	2	2	3	1	1	8	2	1	1	1	1	1	1	1	1	1	1	2	2	1	1	1	1	20	6	4
2	1	3	2	1	1	2	3	3	3	2	8	2	2	2	2	1	1	2	5	2	2	2	4	2	2	2	2	1	10	2	1	2	2	1	1	1	1	2	2	1	4	2	2	2	1	2	29	6	4
2	1	2	2	1	1	2	1	1	1	1	1	1	1	1	1	1	1	1	0	1	1	1	1	1	1	1	1	1	0	1	1	1	1	1	1	1	2	1	1	1	1	1	1	1	2	1	19	3	2
1	1	3	2	1	2	3	2	2	2	2	7	1	1	1	1	1	1	1	0	1	1	1	1	1	1	1	1	1	0	1	1	1	1	1	1	1	1	1	1	1	1	1	1	1	1	1	17	5	4
1	1	3	2	1	1	1	1	1	1	1	0	1	1	1	1	1	1	1	0	1	1	1	1	1	1	1	1	1	0	1	1	1	1	1	1	1	1	1	1	1	1	1	1	1	1	1	17	3	2
2	1	3	1	3	4	5	3	4	3	3	18	4	2	2	3	3	4	3	14	3	4	3	4	4	4	3	3	2	21	3	3	3	3	3	3	3	3	5	5	5	5	3	5	3	3	5	63	9	8
1	1	3	2	3	1	3	1	1	1	1	4	1	1	1	1	1	1	1	0	1	1	1	1	1	1	1	1	1	0	1	1	1	1	1	1	1	1	1	1	1	1	1	1	1	1	1	17	5	2
2	1	3	2	3	2	3	2	4	3	2	12	2	1	1	2	1	3	1	4	3	2	4	3	3	1	1	1	1	10	1	1	1	1	2	1	1	1	2	3	1	1	4	3	2	3	1	29	8	6
2	1	3	2	2	2	4	2	4	2	2	11	2	2	2	2	1	2	2	6	3	2	4	4	4	3	2	2	1	16	2	2	1	2	2	2	2	2	3	2	3	1	4	3	3	2	3	39	6	6
1	1	3	2	3	3	1	2	2	3	2	9	2	1	1	1	1	1	1	1	2	1	3	2	4	1	1	1	1	7	1	1	1	2	1	1	2	1	1	1	1	1	2	1	2	2	1	22	8	5
1	1	3	2	3	2	1	3	2	2	2	8	1	1	1	1	1	1	1	0	2	1	4	4	3	1	1	1	1	9	1	1	5	1	1	1	1	1	1	1	1	1	3	1	1	5	1	27	7	4
2	1	3	2	4	2	4	2	3	2	4	14	1	1	1	1	1	1	1	0	3	3	3	3	3	3	2	2	2	15	2	2	2	2	1	3	2	1	3	3	3	3	3	3	3	2	3	41	10	5
1	1	3	2	1	3	4	1	3	2	2	9	1	1	2	1	1	1	2	2	2	1	1	1	3	2	2	1	1	5	2	1	1	1	1	1	1	2	4	3	2	4	4	3	2	2	2	36	5	6
2	1	3	1	1	2	4	1	1	1	1	4	1	1	1	1	1	1	1	0	2	1	2	1	1	1	1	1	1	2	1	1	1	1	1	1	1	1	1	1	1	1	1	1	1	1	1	17	3	3
2	1	3	2	1	1	1	1	1	1	1	0	1	1	1	1	1	1	1	0	1	1	1	1	1	1	1	1	1	0	1	1	1	1	1	1	1	1	1	1	1	1	1	1	1	1	1	17	3	2
1	1	3	2	3	2	4	4	3	3	3	15	2	2	2	3	2	2	2	8	2	2	2	2	2	2	2	2	2	9	2	2	1	2	2	2	2	2	2	2	2	2	5	5	5	5	5	48	9	5
1	1	3	2	2	3	4	2	4	3	3	14	2	2	2	2	2	2	2	7	2	2	2	2	2	2	2	2	1	8	2	1	2	1	1	1	1	1	1	1	3	3	1	3	3	2	1	28	8	7
2	1	3	2	3	2	3	3	3	3	3	13	2	2	2	2	2	2	2	7	2	2	2	2	2	2	2	1	1	7	3	2	3	3	2	2	2	2	2	1	1	2	2	2	2	2	2	35	9	5
2	1	3	2	1	1	1	1	1	1	1	0	1	1	1	1	1	1	1	0	1	1	1	1	1	1	1	1	1	0	1	1	1	1	1	1	1	1	1	1	1	1	1	1	1	1	1	17	3	2
2	1	3	2	1	1	1	1	1	1	1	0	1	1	1	1	1	1	1	0	1	1	1	1	1	1	1	1	1	0	1	1	1	1	1	1	1	1	1	2	1	1	1	1	1	1	1	18	3	2
2	1	3	2	2	1	2	2	2	2	2	6	1	1	1	1	1	1	1	0	1	1	1	1	1	1	1	1	1	0	1	1	1	1	1	1	1	1	1	1	1	1	1	1	1	1	1	17	6	3
1	1	3	2	1	1	1	1	1	1	1	0	1	1	1	1	1	1	1	0	2	1	1	1	1	1	1	1	1	1	1	1	1	1	1	1	1	1	1	1	1	1	1	1	1	1	1	17	3	2
2	1	3	2	4	3	5	3	3	3	3	17	3	2	3	3	3	3	3	13	3	3	3	3	3	3	4	3	1	17	3	2	4	4	3	3	3	2	4	4	4	5	4	3	4	2	4	58	10	6
2	1	3	2	2	1	1	1	1	1	1	1	1	1	1	1	1	1	1	0	1	1	1	2	1	1	1	1	1	1	1	1	1	1	1	1	1	1	1	1	1	1	1	1	2	1	1	18	4	2
2	1	2	2	2	3	2	2	1	1	1	5	1	1	1	2	1	1	2	2	2	2	2	2	2	2	1	2	2	8	1	1	1	1	1	1	1	1	2	2	2	2	2	2	2	1	1	24	4	4
2	1	3	1	3	2	3	2	3	3	2	11	2	1	2	1	1	1	1	2	2	1	1	2	1	1	2	1	1	3	2	1	2	2	1	1	1	1	1	2	1	2	1	1	2	1	1	23	8	5
2	1	3	2	3	2	3	2	3	3	2	11	2	2	2	2	1	2	2	6	1	2	2	2	2	2	1	2	1	6	2	1	1	2	2	2	2	1	1	1	1	1	1	2	1	1	1	23	8	5
2	1	3	2	3	2	3	3	3	4	3	14	3	2	3	2	2	3	1	9	2	3	3	3	2	3	3	2	1	13	3	2	1	3	2	3	4	2	2	4	3	4	4	3	3	3	3	49	10	5
2	1	3	2	1	1	1	1	1	1	1	0	1	1	1	1	1	1	1	0	1	1	1	1	1	1	1	1	1	0	1	1	1	1	1	1	1	1	1	1	1	1	1	1	1	1	1	17	3	2
2	1	3	2	2	1	3	2	2	1	1	5	1	1	1	1	1	1	1	0	1	1	4	1	4	1	1	1	1	6	1	1	1	1	1	1	1	1	1	1	1	1	1	1	1	1	1	17	4	3
1	1	3	2	3	2	3	1	1	1	1	5	2	1	1	1	1	1	1	1	1	1	1	2	1	1	1	1	1	1	1	1	1	1	1	1	1	1	1	1	1	1	1	1	1	1	1	17	5	3
2	1	3	2	4	1	3	4	2	3	3	13	2	2	4	2	1	2	1	7	1	1	2	2	1	1	1	1	1	2	1	1	2	1	1	4	2	2	2	1	1	2	2	2	1	1	1	27	10	3
1	1	3	2	1	3	1	1	1	3	2	5	1	1	2	2	1	1	2	3	1	1	2	2	1	1	1	1	1	2	1	1	2	2	1	1	1	1	1	1	1	2	2	1	1	1	1	21	6	4
1	1	3	2	1	1	1	1	1	1	1	0	1	1	2	1	1	2	1	2	1	1	1	1	1	2	4	2	1	5	1	1	1	1	1	1	1	1	1	1	1	2	1	1	2	2	2	21	3	2
2	1	3	2	2	2	4	2	2	2	1	8	1	1	2	1	1	1	1	1	2	2	2	2	2	2	2	1	2	8	2	1	1	2	1	2	2	1	1	1	1	2	1	1	1	3	1	24	5	4
1	1	3	2	4	2	3	3	3	3	3	14	3	3	3	2	2	2	2	10	2	2	2	2	2	2	2	2	2	9	2	2	2	2	2	2	2	2	2	2	2	2	2	2	2	2	2	34	10	5
2	1	3	2	1	1	2	2	1	2	2	4	1	1	1	2	1	2	2	3	1	1	2	2	2	2	2	1	1	5	1	1	1	1	1	2	2	2	2	1	1	2	2	2	2	1	1	25	5	2
2	1	3	2	3	2	3	2	3	5	2	13	2	2	2	2	2	3	2	8	3	2	2	2	2	1	2	1	1	7	2	1	1	2	2	2	2	1	2	1	1	1	2	2	2	2	2	28	10	5
1	1	3	2	1	1	3	2	1	2	1	4	2	2	2	2	2	2	2	7	1	1	1	1	1	1	1	1	1	0	1	1	1	1	1	1	1	1	1	1	1	1	1	1	1	1	1	17	4	2
1	1	3	2	2	2	2	2	2	2	2	7	2	2	2	2	2	2	2	7	2	2	2	2	2	2	2	2	2	9	2	2	2	2	2	2	2	2	2	2	2	2	2	2	2	2	2	34	6	4
2	1	3	2	3	2	3	3	3	2	3	12	3	3	3	3	3	3	3	14	3	3	2	2	2	2	2	2	2	11	3	3	3	3	3	3	3	3	2	3	1	3	3	3	3	3	3	48	8	5
2	1	3	2	4	2	5	2	3	2	2	13	1	1	1	1	1	1	1	0	3	1	1	4	3	1	2	1	1	8	1	1	1	1	1	1	1	1	1	1	1	1	1	1	1	1	1	17	8	5
2	1	3	2	2	2	2	2	2	2	2	7	2	2	2	2	1	2	2	6	2	2	1	2	1	3	3	3	2	10	1	1	1	1	1	1	1	1	1	1	1	1	1	3	1	2	1	20	6	4
2	1	3	2	3	3	3	3	3	3	3	14	4	4	4	4	4	4	1	18	4	4	4	4	3	4	1	2	1	18	1	1	1	1	1	1	1	1	1	1	1	1	5	5	5	5	1	33	9	6
2	1	3	2	3	2	4	3	3	3	3	14	2	2	2	2	2	2	2	7	2	2	2	2	2	2	2	2	2	9	3	3	3	3	3	3	3	3	3	3	3	3	3	3	3	3	3	51	9	5
2	1	3	2	1	1	1	1	1	1	1	0	2	2	2	2	1	1	1	4	1	1	1	1	1	1	1	1	1	0	1	1	1	1	1	1	1	1	1	1	1	1	1	1	1	1	1	17	3	2
2	1	3	2	3	2	3	2	3	3	1	10	2	1	1	1	1	1	1	1	1	1	1	1	2	1	2	2	1	3	2	1	1	2	1	2	2	2	1	1	1	2	1	1	2	1	1	24	7	5
1	1	3	2	3	2	3	2	2	3	2	10	1	1	1	1	1	1	1	0	1	1	2	1	1	1	1	1	1	1	1	1	1	1	1	1	1	1	1	1	1	1	2	2	2	2	1	21	8	4
2	1	3	2	2	2	3	3	3	2	2	10	3	2	2	2	2	2	2	8	3	2	3	3	3	3	3	2	2	15	2	1	1	1	2	1	1	1	2	3	2	2	2	2	3	2	2	30	6	5
1	1	2	2	3	2	4	2	3	4	2	13	2	2	1	2	1	2	2	5	2	1	2	2	1	2	3	1	1	6	2	1	2	2	2	1	2	1	1	1	1	2	2	2	3	3	1	29	9	5
2	1	3	2	1	2	2	1	1	2	2	4	2	1	2	2	2	2	1	5	2	2	2	2	1	2	2	2	2	8	1	1	1	1	1	1	1	1	2	2	1	2	2	3	3	2	2	27	5	3
2	1	3	2	3	2	2	2	2	2	2	8	2	1	1	1	1	1	1	1	2	1	1	2	1	2	1	1	1	3	1	1	1	1	1	1	1	3	1	1	1	1	1	1	1	1	1	19	7	4
1	1	3	2	3	2	3	2	2	3	2	10	2	2	2	1	1	2	1	4	2	2	2	1	1	1	1	1	1	3	1	1	2	1	1	1	1	1	1	1	1	2	2	1	1	2	1	21	8	4
2	1	3	2	2	2	3	1	1	3	1	6	2	1	1	1	1	1	2	2	1	1	1	3	1	1	1	1	1	2	2	2	1	1	1	1	1	1	1	1	1	1	3	1	1	2	1	22	6	3
2	1	3	2	1	1	1	1	1	2	1	1	2	1	1	1	1	2	1	2	2	2	1	2	1	1	2	1	1	4	1	1	1	1	1	1	1	1	1	1	1	1	1	1	1	1	1	17	4	2
2	1	3	1	1	1	3	1	3	2	1	5	1	1	1	1	1	1	1	0	1	1	1	1	1	1	1	1	1	0	1	1	1	1	1	1	1	1	1	1	1	1	1	1	1	2	1	18	4	4
2	1	3	2	2	3	4	3	1	3	2	11	2	2	2	2	2	2	2	7	2	2	2	2	1	1	2	1	1	5	1	1	2	1	1	1	1	1	1	1	1	1	1	1	1	1	1	18	7	4
1	1	3	2	2	2	3	2	2	2	2	8	1	1	1	1	1	1	1	0	1	1	1	2	1	1	1	1	1	1	1	1	1	1	1	1	1	1	1	1	1	1	1	1	1	1	1	17	6	4
1	1	3	2	2	2	3	2	2	2	2	8	1	1	1	1	2	1	1	1	1	1	2	1	2	1	1	1	1	2	1	1	1	1	1	1	1	1	1	2	1	1	1	1	1	2	1	19	6	4
2	1	2	2	1	1	1	1	1	1	1	0	1	1	1	1	1	1	1	0	1	1	1	1	1	1	1	1	1	0	1	1	1	1	1	1	1	1	1	1	1	1	1	1	1	1	1	17	3	2
1	1	3	2	2	2	4	2	2	2	2	9	2	2	1	1	1	1	2	3	2	2	1	2	2	1	2	1	1	5	2	1	1	2	1	1	1	2	1	1	1	1	1	1	1	1	1	20	6	4
1	1	3	2	2	2	2	2	2	2	2	7	1	1	1	1	1	1	1	0	1	1	2	3	3	3	3	1	1	9	1	1	1	1	1	1	1	1	1	2	2	2	2	1	3	4	1	26	6	4
2	1	3	2	3	3	3	3	3	3	2	13	2	2	2	1	1	2	2	5	2	1	3	3	1	2	2	2	1	8	2	1	2	2	2	1	1	1	1	1	1	2	4	1	2	1	1	26	8	6
2	1	3	2	3	1	3	2	1	1	1	5	2	2	2	1	1	1	2	4	1	1	1	2	1	2	1	1	1	2	1	1	2	1	1	1	1	1	1	1	2	2	1	1	2	3	2	24	5	2
2	1	3	2	3	1	4	3	3	2	2	11	1	1	2	1	1	1	2	2	1	1	1	1	1	1	1	1	1	0	1	1	1	1	1	1	1	1	1	1	1	1	1	1	1	1	1	17	7	4
1	1	3	2	3	3	3	3	3	3	3	14	1	1	1	1	1	1	1	0	1	1	1	1	1	1	1	1	1	0	1	1	1	1	1	1	1	1	1	1	1	1	1	1	1	1	1	17	9	6
1	1	3	2	2	2	3	2	2	3	2	9	1	1	1	1	1	1	1	0	1	1	1	1	1	1	1	1	1	0	1	1	1	1	1	1	1	1	1	1	1	1	1	1	1	1	1	17	7	4
1	1	3	2	2	2	3	2	2	2	2	8	1	1	1	1	1	1	1	0	2	1	1	2	1	1	1	1	1	2	1	1	1	1	1	1	1	1	1	1	1	2	1	1	2	2	1	20	6	4
1	1	3	2	3	3	2	2	2	3	1	9	1	1	1	1	1	1	2	1	1	1	1	1	2	1	2	1	1	2	1	1	1	1	1	1	1	1	1	1	1	1	1	1	1	1	1	17	7	5
2	1	3	2	1	1	1	1	1	1	1	0	1	1	1	1	1	1	1	0	1	1	1	1	1	1	1	1	1	0	1	1	1	1	1	1	1	1	1	1	1	1	1	1	1	1	1	17	3	2
2	1	3	2	1	1	1	1	1	1	1	0	1	1	1	1	1	1	1	0	1	1	1	1	1	1	1	1	1	0	1	1	1	1	1	1	1	1	1	1	1	1	1	1	1	1	1	17	3	2
1	1	3	2	3	2	3	2	1	2	2	8	2	1	2	2	2	2	2	6	2	2	2	2	2	2	2	2	1	8	2	1	2	2	1	1	1	2	2	1	2	2	2	1	2	2	2	28	7	3
2	1	3	2	3	3	2	2	2	2	2	9	1	1	1	1	1	1	1	0	2	1	1	2	1	2	1	1	1	3	1	1	1	1	1	1	1	1	1	1	1	1	1	1	1	1	1	17	7	5
2	1	3	2	2	2	2	2	2	2	2	7	1	1	1	1	1	1	1	0	1	2	1	1	1	1	1	1	1	1	2	1	2	1	1	1	1	1	1	2	1	1	1	1	1	1	1	20	6	4
2	1	3	2	2	2	3	2	1	1	2	6	2	2	2	2	1	1	1	4	2	1	2	2	1	2	2	1	1	5	1	2	1	1	1	1	1	1	2	1	1	1	2	2	2	2	1	23	5	3
1	1	3	2	2	2	2	2	2	2	2	7	1	1	1	1	1	1	1	0	1	1	1	1	1	1	1	1	1	0	1	2	2	1	2	1	2	1	2	1	2	1	2	1	2	1	2	26	6	4
1	1	3	2	2	1	3	1	2	2	2	6	1	1	1	1	1	1	1	0	2	2	3	1	2	1	1	1	1	5	1	1	1	1	1	1	1	1	1	1	1	1	1	1	1	1	1	17	6	3
2	1	3	2	2	2	2	1	3	1	1	5	1	1	1	1	1	1	1	0	2	1	1	1	1	1	2	1	1	2	1	1	1	1	1	1	1	1	2	1	1	1	1	1	3	1	1	20	4	5
2	1	3	2	3	1	3	4	1	3	3	11	1	2	1	1	1	1	2	2	1	1	1	1	1	1	2	1	1	1	1	1	2	1	1	1	2	2	1	2	1	1	1	1	1	1	1	21	9	2
1	1	3	2	2	1	2	2	1	2	2	5	2	1	1	1	1	1	1	1	1	1	2	1	1	1	1	1	1	1	1	1	2	1	1	1	2	1	1	2	1	1	1	1	1	1	2	21	6	2
1	1	3	2	2	3	4	3	3	3	2	13	2	3	2	2	1	1	2	6	3	1	1	1	2	1	1	1	1	3	2	1	3	2	2	1	2	1	2	1	1	1	2	1	1	4	1	28	7	6
2	1	3	2	3	1	2	3	1	1	2	6	1	2	2	1	1	1	1	2	1	1	1	1	1	1	1	1	1	0	1	1	1	2	1	1	1	1	1	2	1	2	1	1	1	1	1	20	6	2
1	1	3	2	2	3	3	2	2	2	3	10	2	1	2	2	2	2	2	6	2	1	2	1	1	1	1	1	1	2	2	2	2	2	2	2	2	2	2	1	1	1	1	1	1	1	1	26	7	5
1	1	3	2	2	2	3	3	3	3	3	12	2	2	2	2	1	1	3	6	2	1	2	1	1	2	2	1	2	5	2	1	3	3	2	2	2	1	1	2	4	3	3	2	2	3	2	38	8	5
1	1	3	2	1	1	1	1	2	2	1	2	1	1	1	1	1	1	1	0	1	1	1	1	1	1	1	1	1	0	1	1	1	1	1	1	1	1	1	1	1	1	1	1	1	1	1	17	4	3
2	1	3	2	2	1	1	1	2	2	2	4	2	1	1	2	1	2	1	3	1	1	1	1	1	2	1	1	1	1	2	1	2	1	1	1	1	1	1	1	1	1	2	1	2	2	1	22	6	3
1	1	3	2	3	3	3	3	3	3	3	14	2	2	2	2	2	2	2	7	2	2	2	2	2	2	2	2	2	9	2	2	2	2	2	2	2	2	2	2	2	2	2	2	2	2	2	34	9	6
2	1	3	2	2	3	3	2	2	2	2	9	2	2	2	1	1	1	1	3	3	1	1	2	2	1	2	2	1	6	1	1	1	1	1	1	1	1	1	1	1	1	1	1	1	1	1	17	6	5
2	1	3	2	1	1	2	1	1	1	1	1	1	1	1	1	1	1	1	0	1	1	1	1	1	1	1	1	1	0	1	1	1	1	1	1	1	1	1	1	1	1	1	1	1	1	1	17	3	2
2	1	3	2	1	1	2	3	2	2	2	6	1	1	2	1	2	2	2	4	3	2	2	2	2	2	3	2	2	11	2	1	1	1	1	1	1	1	2	2	2	3	2	2	2	1	1	26	5	3
1	1	3	2	4	2	3	2	1	3	2	10	2	1	2	2	1	3	1	5	4	3	1	3	1	1	1	1	1	7	1	1	1	1	1	1	1	1	1	1	1	1	1	1	1	1	1	17	9	3
2	1	3	2	3	2	3	3	2	3	2	11	2	2	2	2	2	2	2	7	2	2	3	2	3	3	3	2	1	12	2	1	2	2	2	2	2	2	2	2	1	3	3	2	2	2	2	34	8	4
1	1	3	2	1	2	2	2	3	2	2	7	2	2	2	1	2	2	1	5	1	2	2	1	2	2	2	2	2	7	1	1	1	2	1	1	1	2	2	2	2	2	1	1	1	2	2	25	5	5
1	1	2	2	2	2	3	2	2	2	2	8	1	1	2	2	1	1	2	3	2	2	1	1	2	2	2	2	2	7	1	1	2	1	1	1	1	1	1	1	1	2	1	2	1	2	2	22	6	4
2	1	3	2	2	2	3	3	2	3	2	10	1	2	1	1	1	1	1	1	1	1	1	1	1	1	1	1	1	0	2	1	1	2	1	1	1	1	1	1	1	1	1	1	1	1	1	19	7	4
2	1	3	2	1	1	1	1	1	1	1	0	1	1	1	1	1	1	1	0	1	1	1	1	1	1	1	1	1	0	1	1	1	1	1	1	1	1	1	1	1	1	1	1	1	1	1	17	3	2
2	1	2	2	3	2	2	4	3	2	2	11	1	1	2	2	2	2	2	5	2	2	1	2	1	2	1	1	1	4	2	1	1	1	1	2	2	2	1	1	1	3	1	1	1	1	1	23	7	5
1	1	3	2	4	3	4	3	3	3	3	16	2	2	2	2	2	2	2	7	2	2	2	2	2	2	2	2	2	9	2	2	2	2	2	2	2	2	2	2	2	2	2	2	2	2	2	34	10	6
1	1	3	2	1	2	4	3	4	4	2	13	2	1	1	2	1	1	2	3	2	2	1	2	1	1	1	1	1	3	2	2	2	2	2	2	2	1	2	2	1	1	1	1	1	1	1	26	7	6
2	1	4	2	5	3	5	5	3	4	3	21	3	3	3	3	3	3	4	15	4	2	4	4	2	3	3	3	2	18	3	2	3	2	2	3	3	2	2	4	3	5	5	3	4	4	4	54	12	6
2	1	3	2	2	3	2	2	1	1	1	5	1	1	1	1	1	1	1	0	2	2	3	3	2	1	1	1	1	7	1	1	1	1	1	1	1	1	1	1	1	2	3	1	1	1	1	20	4	4
1	1	3	2	1	1	1	1	1	1	1	0	1	1	1	1	1	1	1	0	1	1	1	1	1	1	1	1	1	0	1	1	1	1	1	1	1	1	1	1	1	1	1	1	1	1	1	17	3	2
2	1	3	2	1	1	5	5	1	1	1	8	1	1	1	1	1	1	1	0	1	1	1	1	1	1	1	1	1	0	1	1	1	1	1	1	1	1	1	1	1	1	1	1	1	2	1	18	3	2
2	1	3	2	2	2	3	2	2	2	2	8	2	2	2	1	1	1	1	3	2	1	1	1	1	1	1	1	1	1	1	1	2	2	1	1	2	1	1	1	1	1	1	1	1	1	1	20	6	4
1	1	3	2	1	1	1	1	1	1	1	0	1	1	1	1	1	1	1	0	3	2	2	3	2	2	2	2	2	11	2	2	2	2	2	2	2	2	2	2	2	2	2	2	2	2	2	34	3	2
2	1	3	2	3	4	4	4	3	5	3	19	4	3	4	2	2	3	2	13	3	3	4	4	2	4	3	1	3	18	4	4	2	3	2	3	2	1	2	2	3	4	3	2	4	4	4	49	11	7
1	1	3	2	1	1	1	1	1	1	1	0	1	1	1	1	1	1	1	0	1	1	1	1	1	1	1	1	1	0	1	1	1	1	1	1	1	1	1	1	1	1	1	1	1	1	1	17	3	2
2	1	3	2	2	2	2	2	2	2	2	7	1	1	1	1	1	1	1	0	1	1	1	1	1	1	1	1	1	0	1	1	1	1	1	1	1	1	1	1	1	1	1	1	1	1	1	17	6	4
2	1	3	2	2	2	3	2	2	3	3	10	2	1	2	2	1	2	2	5	1	1	1	1	1	1	1	1	1	0	1	1	1	2	1	1	1	1	1	1	1	1	1	1	1	1	1	18	8	4
1	1	3	2	2	2	2	2	2	2	2	7	1	1	1	1	1	1	1	0	1	1	1	1	1	1	1	1	1	0	1	1	1	1	1	1	1	1	1	1	1	1	1	1	1	1	1	17	6	4
1	1	3	2	3	2	3	2	1	1	1	6	1	1	1	1	1	1	1	0	1	1	1	1	1	1	1	1	1	0	1	1	1	1	1	1	1	1	1	1	1	1	1	1	1	2	1	18	5	3
2	1	3	2	4	2	2	2	2	2	2	9	1	1	1	1	1	1	1	0	1	1	1	1	1	1	1	1	1	0	1	1	1	1	1	1	1	1	1	2	1	1	1	1	1	1	1	18	8	4
1	1	3	2	1	2	2	1	1	1	1	2	1	1	1	1	1	1	1	0	1	1	1	1	1	1	1	1	1	0	1	1	1	1	1	1	1	1	1	1	1	1	1	1	1	1	1	17	3	3
2	1	3	2	2	1	2	2	2	2	2	6	2	1	1	1	1	1	1	1	2	1	1	2	1	1	1	1	1	2	2	2	2	1	1	1	1	1	1	1	1	1	1	1	1	1	1	20	6	3
2	1	3	2	3	2	2	3	3	3	3	12	2	1	1	1	1	2	2	3	2	2	2	2	2	2	2	2	1	8	2	1	1	2	1	1	1	1	1	1	1	1	2	2	2	1	1	22	9	5
1	1	3	2	3	2	4	4	3	3	3	15	2	2	2	2	2	2	2	7	2	2	2	2	1	1	2	1	1	5	1	1	2	1	1	1	1	1	1	1	1	1	1	1	1	1	1	18	9	5
2	1	3	2	3	2	4	3	2	3	2	12	2	2	2	2	1	2	2	6	2	2	2	2	1	2	1	1	1	5	1	1	1	2	1	1	1	1	1	1	1	2	2	2	2	2	1	23	8	4
2	1	3	2	3	2	4	3	1	3	2	11	1	1	1	1	1	1	1	0	1	2	1	2	1	1	1	1	1	2	1	1	1	2	1	1	1	1	1	1	1	1	1	1	1	1	1	18	8	3
1	1	3	2	2	2	2	2	3	2	2	8	1	1	1	1	1	1	1	0	1	1	1	1	1	1	1	1	1	0	1	1	1	1	1	1	1	1	1	1	1	1	1	1	1	1	1	17	6	5
2	1	3	1	3	2	3	3	2	3	2	11	1	1	2	1	2	2	2	4	2	2	3	3	2	2	3	2	1	11	2	1	1	1	1	1	2	3	2	3	3	2	2	1	3	2	1	31	8	4
2	1	3	2	1	4	4	1	2	1	1	7	1	2	1	2	1	1	1	2	3	2	2	3	2	1	2	1	1	8	1	1	2	1	1	1	1	1	3	1	1	2	2	2	1	1	1	23	3	6
2	1	4	2	3	1	2	3	1	3	3	9	2	1	1	1	1	1	1	1	3	1	3	2	1	2	2	1	1	7	1	1	1	1	1	1	1	1	1	1	1	1	1	1	2	1	1	18	9	2
2	1	4	2	4	3	3	3	2	4	3	15	2	2	2	3	2	2	3	9	4	3	2	3	3	3	2	2	2	15	2	1	2	3	2	4	2	1	1	4	1	5	3	3	3	2	2	41	11	5
2	1	3	2	4	4	5	5	2	3	3	19	3	2	2	3	2	2	2	9	3	3	3	4	4	4	2	2	1	17	3	1	3	3	1	2	1	3	2	1	4	3	3	3	3	3	2	41	10	6
1	1	4	2	3	3	3	1	2	3	2	10	1	2	2	2	2	2	2	6	2	2	2	2	2	1	2	2	1	7	2	1	2	2	1	1	1	1	2	2	1	2	2	1	2	2	1	26	8	5
1	1	3	2	1	1	1	1	1	1	1	0	4	3	3	2	2	2	2	11	2	2	2	2	2	2	2	2	2	9	2	2	2	2	2	2	2	2	2	2	2	2	2	2	2	2	2	34	3	2
2	1	3	2	3	2	4	3	2	3	2	12	2	2	2	4	2	3	3	11	2	3	3	2	2	1	1	1	1	7	1	2	2	2	2	1	1	1	1	1	1	2	3	3	2	4	4	33	8	4
1	1	4	2	3	2	1	1	2	4	2	8	2	2	2	2	2	2	2	7	2	2	2	2	2	2	2	2	2	9	2	2	2	2	2	2	2	2	2	2	2	2	2	2	2	2	2	34	9	4
2	1	4	2	1	2	3	2	2	3	3	9	2	2	2	2	2	2	2	7	1	2	2	2	1	1	1	1	1	3	1	1	2	2	1	2	1	1	1	1	1	1	2	1	1	2	1	22	7	4
2	1	3	2	4	2	3	3	3	2	3	13	1	1	1	1	1	1	1	0	4	3	2	3	2	3	2	2	1	13	1	1	1	1	1	1	1	1	1	1	1	1	1	1	1	1	1	17	9	5
2	1	3	2	2	2	3	2	3	2	2	9	1	1	1	1	1	2	2	2	1	1	2	1	1	1	1	1	1	1	2	1	2	1	1	1	2	1	1	1	1	1	1	1	1	1	1	20	6	5
1	1	3	2	1	2	4	1	4	3	2	10	2	2	2	2	2	2	2	7	2	2	3	2	2	2	2	2	1	9	2	1	2	2	1	2	2	2	2	2	1	2	3	2	2	3	1	32	6	6
1	1	3	2	1	2	3	3	1	2	1	6	1	1	1	1	1	1	1	0	1	1	1	1	2	1	1	1	1	1	1	1	1	1	1	1	1	1	1	1	1	1	1	1	1	1	1	17	4	3
1	1	3	2	3	2	3	3	2	4	2	12	2	2	2	2	2	2	2	7	2	2	1	2	1	1	1	1	1	3	1	1	2	2	1	1	3	2	1	2	2	2	1	2	2	3	1	29	9	4
2	1	3	2	2	2	3	2	2	2	2	8	2	1	1	1	1	1	1	1	1	1	1	1	1	1	1	1	1	0	1	1	1	1	1	1	1	1	1	1	1	1	1	1	1	1	1	17	6	4
2	1	3	2	2	2	4	3	3	3	2	12	2	2	2	1	1	1	1	3	2	1	2	2	1	1	1	1	1	3	1	2	2	2	1	1	1	1	1	1	1	2	1	1	1	2	1	22	7	5
2	1	1	2	2	2	3	2	4	1	1	8	2	2	2	2	1	1	2	5	2	2	1	1	1	1	1	1	1	2	1	1	1	1	1	1	1	1	1	1	1	1	1	1	1	2	1	18	4	6
2	1	3	2	3	2	3	2	3	2	2	10	2	2	2	1	2	2	2	6	2	2	2	2	2	2	2	3	2	10	3	1	2	2	2	2	2	2	2	2	3	3	3	3	3	3	3	41	7	5
1	1	3	2	3	1	4	1	1	3	2	8	2	1	2	1	1	1	1	2	1	1	1	1	1	1	1	1	1	0	1	1	1	1	1	1	1	1	1	1	1	1	1	1	1	1	1	17	8	2
2	1	3	2	3	2	4	3	2	2	2	11	2	3	2	2	1	1	1	5	1	1	1	1	1	1	1	1	1	0	3	2	2	2	1	1	1	1	1	1	1	1	1	1	1	1	1	22	7	4
2	1	4	2	3	2	2	2	2	2	2	8	1	1	1	1	1	1	1	0	1	1	1	1	1	1	1	1	1	0	1	1	2	1	1	1	1	1	1	1	1	1	1	1	1	1	1	18	7	4
2	1	3	2	3	2	4	3	3	3	2	13	2	1	2	1	1	1	2	3	1	1	2	1	1	1	1	1	1	1	1	1	1	1	1	1	1	1	1	1	1	2	2	1	1	2	1	20	8	5
1	1	3	2	2	1	1	1	1	1	1	1	1	1	1	1	1	1	1	0	1	1	1	1	1	1	1	1	1	0	1	1	1	1	1	1	1	1	1	1	1	1	1	1	1	1	1	17	4	2
1	1	3	2	3	1	4	4	4	4	4	17	2	2	2	2	2	2	2	7	2	2	2	2	2	2	2	2	2	9	2	2	2	2	2	2	2	2	2	2	2	2	2	2	2	4	4	38	11	5
2	1	3	2	2	2	3	2	1	1	1	5	1	1	1	2	1	1	2	2	1	1	1	1	1	1	1	1	1	0	1	1	1	1	1	1	1	1	1	1	1	2	1	1	1	1	1	18	4	3
1	1	4	2	4	3	4	4	3	3	4	18	3	3	3	3	3	3	2	13	3	3	3	4	3	3	3	3	1	17	3	3	3	3	2	1	2	2	3	4	3	3	4	3	4	4	3	50	11	6
1	1	3	2	2	1	5	2	3	3	1	10	1	1	2	2	1	1	1	2	1	1	3	2	1	1	2	1	1	4	2	1	2	1	1	1	1	2	1	1	1	2	3	1	2	4	1	27	6	4
2	1	4	2	4	3	5	4	3	3	4	19	3	4	4	4	3	3	3	17	4	4	4	4	2	3	4	2	3	21	4	4	4	4	4	4	4	4	3	2	3	5	3	3	3	5	5	64	11	6
2	1	4	2	4	1	5	3	4	3	3	16	3	2	2	4	2	1	1	8	2	2	2	4	4	2	2	1	1	11	2	1	1	2	1	3	3	3	2	2	3	4	4	4	4	3	3	45	10	5
1	1	4	2	3	3	5	3	5	4	3	19	2	2	2	2	1	2	2	6	3	2	2	2	1	1	3	2	1	8	2	2	3	2	2	2	2	3	2	2	1	4	2	2	4	3	4	42	10	8
2	1	3	2	2	2	3	3	2	3	2	10	1	2	1	1	1	1	2	2	1	1	1	1	1	1	1	1	1	0	1	1	1	1	1	1	1	2	1	1	1	1	1	1	1	1	1	18	7	4
1	1	3	2	1	1	3	1	3	1	1	4	1	1	1	1	1	1	1	0	1	1	1	1	1	1	1	1	1	0	1	1	2	1	1	1	1	1	1	2	1	1	1	1	1	1	1	19	3	4
1	1	3	2	1	2	1	1	1	2	1	2	2	2	3	1	1	2	1	5	2	2	4	4	2	4	2	1	2	14	2	1	2	2	1	3	3	2	1	5	5	5	2	3	3	2	5	47	4	3
2	1	3	2	2	2	2	2	2	2	2	7	2	2	2	2	2	2	2	7	2	2	2	2	2	2	2	2	2	9	2	2	2	2	2	2	2	2	2	1	1	2	2	1	1	2	2	30	6	4
2	1	4	2	2	3	2	3	1	2	1	7	2	1	1	1	1	1	1	1	2	1	2	2	1	1	1	1	1	3	1	1	1	2	1	1	1	1	2	3	1	1	1	1	1	1	1	21	5	4
1	1	2	2	2	1	4	2	2	1	1	6	1	1	1	1	1	1	1	0	1	1	1	1	1	1	1	1	1	0	2	1	2	2	1	1	1	2	1	2	1	2	1	1	1	1	1	23	4	3
2	1	3	2	2	2	3	3	2	2	2	9	2	1	1	1	1	2	2	3	1	1	2	1	1	1	2	2	1	3	1	1	1	2	1	2	2	1	1	2	1	1	2	2	2	2	1	25	6	4
1	1	3	2	2	2	2	1	1	1	1	3	1	1	2	2	1	1	1	2	2	2	2	2	1	2	3	1	1	7	1	1	2	1	1	1	1	1	1	1	1	1	1	1	1	1	1	18	4	3
1	1	3	2	3	4	2	2	2	2	2	10	3	3	2	2	2	2	2	9	2	2	2	2	2	2	2	1	1	7	2	1	1	1	1	1	2	2	2	1	1	1	3	3	2	2	2	28	7	6
2	1	3	2	1	1	1	1	1	1	1	0	2	2	2	2	2	2	2	7	2	2	2	2	2	1	2	2	1	7	1	1	1	1	1	1	1	1	2	1	1	1	2	2	2	1	2	22	3	2
1	1	3	2	1	1	1	1	1	1	1	0	1	1	1	1	1	1	1	0	1	1	1	1	1	1	1	1	1	0	1	1	1	1	1	1	1	1	1	1	1	2	1	1	1	1	1	18	3	2
1	1	3	2	1	1	1	1	3	1	1	2	1	1	1	1	1	1	1	0	2	1	1	2	1	2	2	1	1	4	1	1	1	1	1	1	1	1	1	1	1	2	1	1	2	1	1	19	3	4
2	1	3	2	3	2	2	2	2	2	2	8	1	1	1	1	1	1	1	0	1	1	1	1	1	1	1	1	1	0	1	1	1	2	1	1	1	1	1	1	1	1	1	1	1	1	1	18	7	4
2	1	4	2	2	2	3	1	1	1	1	4	1	1	1	1	1	2	1	1	2	2	2	2	3	2	2	1	1	8	2	1	2	1	1	1	1	1	1	1	1	1	1	1	1	1	1	19	4	3
1	1	3	2	2	2	2	2	2	2	2	7	2	2	2	1	1	1	2	4	2	2	2	2	2	1	1	1	1	5	2	1	3	2	1	1	1	2	1	1	1	2	1	1	1	1	1	23	6	4
1	1	3	2	3	1	2	2	3	3	3	10	1	1	1	1	1	1	1	0	1	1	1	1	1	1	1	1	1	0	1	1	1	1	1	1	1	1	1	1	1	1	1	1	1	1	1	17	9	4
2	1	3	2	4	1	4	4	4	4	4	18	3	3	3	3	2	3	3	13	3	3	3	3	2	3	3	2	1	14	2	2	2	3	1	2	2	2	2	3	1	3	3	3	3	3	3	40	12	5
1	1	4	2	1	1	1	1	1	1	1	0	1	1	1	1	1	1	1	0	1	1	1	1	1	1	1	1	1	0	1	1	1	1	1	1	1	1	1	1	1	1	1	1	1	1	1	17	3	2
1	1	4	2	1	1	2	1	1	2	1	2	1	1	2	1	1	1	1	1	1	1	1	1	1	1	1	1	1	0	1	1	2	1	1	1	1	1	1	1	1	1	1	1	1	1	1	18	4	2
2	1	3	2	2	3	2	1	1	1	1	4	1	1	1	1	1	1	2	1	1	1	1	1	1	1	1	1	1	0	1	1	1	1	1	1	1	1	1	1	1	1	1	1	1	1	1	17	4	4
1	1	3	2	2	1	3	2	2	3	2	8	1	1	1	1	1	1	1	0	1	1	1	1	1	1	1	1	1	0	1	1	1	1	1	1	1	2	1	1	1	2	1	1	1	2	1	20	7	3
1	1	3	2	1	2	2	2	3	1	1	5	1	1	1	1	1	1	1	0	1	1	1	1	1	1	2	1	1	1	1	1	1	1	1	2	2	1	1	1	1	1	1	1	1	1	1	19	3	5
1	1	3	2	1	3	2	1	2	3	2	7	1	1	1	1	1	2	1	1	2	1	1	3	2	1	1	2	1	5	2	1	2	1	1	1	1	1	1	1	1	2	3	1	2	1	1	23	6	5
2	1	3	2	3	1	2	1	1	1	1	3	1	1	1	1	1	1	1	0	1	1	1	1	1	1	1	1	1	0	1	1	1	1	1	1	1	1	1	1	1	1	1	1	1	1	1	17	5	2
2	1	3	2	3	3	4	2	3	2	2	12	2	2	2	1	1	2	2	5	2	2	2	2	2	1	2	1	1	6	1	2	2	2	2	1	1	1	1	1	1	2	2	2	2	2	1	26	7	6
2	1	3	2	1	2	1	1	1	2	1	2	1	1	1	1	1	1	1	0	1	2	1	2	1	2	2	1	1	4	1	1	1	1	1	1	1	1	1	1	2	2	1	1	2	1	1	20	4	3
1	1	3	2	2	3	5	3	3	3	2	14	3	3	3	3	3	3	3	14	3	3	3	3	3	3	3	3	1	16	4	3	4	3	3	3	3	3	3	3	3	3	3	3	3	3	3	53	7	6
2	1	3	2	1	2	1	1	2	1	1	2	2	1	1	1	1	2	1	2	2	2	2	2	1	1	2	1	1	5	1	1	2	2	1	1	1	1	2	2	1	2	2	1	2	2	1	25	3	4
1	1	3	2	2	2	2	2	2	2	2	7	1	1	1	1	1	1	1	0	1	1	1	1	1	1	1	1	1	0	2	2	2	2	2	2	2	2	2	2	2	2	2	2	2	2	2	34	6	4
2	1	3	2	3	2	3	2	1	2	2	8	1	1	1	1	1	1	1	0	1	1	1	1	1	1	1	1	1	0	1	1	1	2	1	1	1	1	1	1	1	1	1	1	1	1	1	18	7	3
2	1	3	2	3	3	5	4	2	2	3	15	2	2	2	2	1	1	2	5	1	1	1	1	1	1	1	1	1	0	2	1	2	2	1	1	1	1	1	1	1	1	1	1	1	2	1	21	8	5
1	1	3	2	1	3	4	2	3	3	2	11	1	2	2	1	1	1	2	3	1	1	2	1	1	1	1	1	1	1	2	1	2	2	1	1	1	1	1	1	1	1	2	1	1	1	1	21	6	6
2	1	3	2	3	2	3	3	2	3	3	12	2	2	2	1	1	1	1	3	2	1	3	2	2	1	2	2	1	7	2	2	2	1	1	1	2	1	2	1	1	3	2	1	2	1	1	26	9	4
2	1	3	2	3	3	3	3	3	3	3	14	1	1	1	1	1	1	1	0	1	1	1	1	1	1	1	1	1	0	1	1	1	1	1	1	1	1	1	1	1	1	1	1	1	1	1	17	9	6
2	1	3	2	3	3	4	4	3	4	4	18	3	3	3	3	2	2	3	12	3	3	3	3	2	2	3	2	2	14	2	2	4	3	3	2	2	3	2	2	3	4	4	3	4	4	4	51	11	6
1	1	3	2	2	2	2	2	2	2	2	7	2	2	2	2	2	2	2	7	2	2	2	2	2	2	2	2	2	9	2	2	2	2	2	2	2	2	2	2	2	2	2	2	2	2	2	34	6	4
1	1	3	2	2	2	2	2	2	2	2	7	1	1	1	1	1	1	1	0	1	1	1	1	1	1	1	1	1	0	1	1	1	1	1	1	1	1	1	1	1	1	1	1	1	1	1	17	6	4
1	1	4	2	2	2	2	2	2	2	2	7	1	1	1	1	1	1	1	0	1	1	1	1	1	1	1	1	1	0	1	1	1	1	1	1	1	1	1	1	1	1	1	1	1	1	1	17	6	4
1	1	3	2	1	2	2	2	2	3	2	7	3	3	3	3	2	2	3	12	2	2	2	2	2	2	2	3	1	9	2	1	2	2	1	1	1	1	1	1	1	2	2	1	2	1	1	23	6	4
2	1	3	2	1	1	1	1	1	1	1	0	2	1	2	1	1	1	1	2	1	1	1	1	1	1	1	1	1	0	1	1	1	1	1	1	1	1	1	1	1	1	1	1	1	1	1	17	3	2
2	1	3	2	1	3	2	2	2	2	2	7	2	2	1	1	1	2	2	4	2	2	2	2	2	1	1	1	1	5	1	1	2	1	1	1	1	1	1	1	1	1	2	2	2	2	1	22	5	5
2	1	4	2	3	2	3	4	3	4	4	16	2	1	1	1	2	2	1	3	1	2	2	2	1	1	1	1	1	3	1	2	1	1	1	2	2	1	2	2	1	2	2	1	2	1	1	25	11	5
2	1	3	2	3	2	3	3	4	3	3	14	3	2	1	1	1	2	2	5	3	2	1	3	3	2	3	1	1	10	2	2	2	3	2	1	1	1	2	1	2	2	2	1	1	2	1	28	9	6
1	1	3	2	1	1	1	1	1	1	1	0	1	1	1	1	1	1	1	0	1	1	1	1	1	1	1	1	1	0	1	1	1	1	1	1	1	1	1	1	1	1	1	1	1	1	1	17	3	2
2	1	3	2	4	1	3	3	2	2	2	10	1	1	1	1	1	1	1	0	1	1	2	1	1	1	1	1	1	1	1	1	1	1	1	1	1	1	1	1	1	1	1	1	1	1	1	17	8	3
2	1	3	2	3	2	3	3	2	3	2	11	2	2	1	1	1	2	2	4	2	2	3	3	1	2	2	1	1	8	2	1	1	2	2	2	3	1	1	2	1	3	1	1	2	3	1	29	8	4
2	1	3	2	1	3	4	1	1	2	1	6	1	1	1	1	1	1	1	0	2	2	2	2	2	2	1	1	1	6	1	1	2	1	1	1	1	1	2	1	1	2	1	1	3	1	1	22	4	4
2	1	3	2	3	3	3	3	3	3	3	14	3	3	3	3	2	3	2	12	2	3	2	3	2	3	3	3	1	13	2	1	2	2	2	4	4	2	2	1	1	3	3	3	3	4	4	43	9	6
2	1	3	2	3	2	4	3	2	3	2	12	2	1	1	1	1	1	2	2	1	1	2	2	1	1	1	1	1	2	2	1	2	2	1	1	1	1	1	1	1	1	2	1	2	2	1	23	8	4
2	1	3	2	3	4	5	5	5	5	5	25	3	3	2	2	2	3	2	10	3	2	3	3	1	2	2	1	1	9	4	2	5	5	4	5	5	2	2	2	1	3	1	3	2	3	3	52	13	9
2	1	3	2	1	1	1	1	1	2	1	1	2	1	1	1	1	1	1	1	1	1	1	1	1	1	1	1	1	0	1	1	1	1	1	1	1	1	1	1	1	1	1	1	1	1	1	17	4	2
1	1	3	2	1	2	3	2	2	2	3	8	1	1	1	1	1	1	1	0	1	1	1	1	1	1	2	1	1	1	2	1	1	1	1	2	1	1	1	1	1	2	1	1	2	3	1	23	6	4
2	1	3	2	2	2	4	2	2	3	1	9	2	2	1	1	1	1	1	2	1	1	1	1	1	1	1	1	1	0	2	1	1	1	1	1	1	1	1	2	1	1	1	1	1	1	1	19	6	4
2	1	3	2	2	2	3	2	2	1	1	6	1	2	1	1	1	1	1	1	1	1	1	1	1	1	1	1	1	0	1	1	1	1	1	1	1	1	1	1	1	1	1	1	1	1	1	17	4	4
2	1	3	2	3	2	3	1	2	3	2	9	1	1	1	1	1	2	1	1	2	1	2	2	1	1	3	1	1	5	1	1	1	2	1	1	1	1	2	1	1	2	1	2	2	2	1	23	8	4
1	1	3	2	2	2	3	3	1	3	3	10	1	2	2	1	1	1	1	2	2	1	1	2	1	2	1	1	1	3	1	1	1	1	1	1	1	1	1	1	1	2	1	1	1	2	1	19	8	3
1	1	3	2	3	2	2	2	2	3	2	9	1	1	1	1	1	1	1	0	1	1	1	1	1	1	1	1	1	0	1	1	1	1	1	1	1	1	1	1	1	1	1	1	1	1	1	17	8	4
2	1	3	1	3	3	3	3	2	2	2	11	2	2	2	2	1	2	1	5	2	2	2	2	1	1	2	1	1	5	2	1	2	2	1	1	1	1	1	1	2	2	1	2	2	3	1	26	7	5
2	1	3	2	2	2	4	3	2	3	2	11	2	2	3	2	2	2	3	9	2	1	1	3	3	1	1	1	1	5	1	1	3	2	3	2	1	1	1	1	1	2	2	2	1	2	3	29	7	4
1	1	4	2	3	3	3	3	3	3	3	14	2	2	2	2	2	2	3	8	2	3	2	2	2	2	2	2	2	10	2	3	2	3	2	3	2	3	2	3	2	3	3	2	2	2	2	41	9	6
1	1	4	2	1	1	1	1	1	3	1	2	1	1	1	1	1	1	1	0	4	4	1	4	1	4	4	1	1	15	1	1	1	1	1	1	1	1	1	1	1	1	1	1	1	1	1	17	5	2
1	1	4	2	3	2	3	2	2	2	2	9	1	1	1	1	1	1	1	0	2	1	1	2	1	1	1	1	1	2	1	1	2	1	1	1	1	1	1	1	1	1	1	1	1	1	1	18	7	4
2	1	3	2	3	2	4	2	2	2	2	10	2	2	2	1	1	1	1	3	1	1	1	1	1	1	1	1	1	0	2	1	2	2	1	1	1	1	1	1	1	1	2	1	1	2	2	23	7	4
2	1	3	2	2	2	2	2	3	1	1	6	1	1	1	1	1	1	1	0	1	2	2	2	1	1	1	1	1	3	3	1	1	1	1	1	1	1	1	1	1	3	1	1	1	1	1	21	4	5
1	1	3	2	1	1	3	1	1	1	1	2	1	1	1	1	1	1	1	0	1	1	1	1	1	1	1	1	1	0	1	1	1	1	1	1	1	1	1	1	1	1	1	1	1	1	1	17	3	2
2	1	2	2	3	3	2	2	4	3	2	12	1	1	1	2	1	1	1	1	1	1	1	1	1	1	2	1	1	1	1	1	1	1	1	1	1	1	1	2	3	1	1	1	1	1	1	20	8	7
2	1	4	2	3	2	4	3	1	3	2	11	2	2	2	2	1	1	2	5	2	2	2	2	2	2	2	2	1	8	2	1	2	2	1	1	2	2	1	2	1	2	1	1	2	2	2	27	8	3
2	1	3	2	1	1	1	1	1	2	1	1	1	1	1	2	1	2	1	2	1	1	1	2	1	1	1	1	1	1	1	1	1	1	1	1	1	1	1	1	1	1	1	2	1	1	1	18	4	2
2	1	3	2	1	2	2	1	1	1	1	2	1	1	1	1	1	1	1	0	1	1	1	1	1	1	1	1	1	0	1	1	1	1	1	1	1	1	1	1	1	1	1	1	1	1	1	17	3	3
2	1	3	2	1	1	3	3	4	2	1	8	2	1	1	1	1	2	3	4	2	2	4	1	1	2	1	1	1	6	1	1	2	2	1	1	1	2	1	3	1	4	1	1	2	4	1	29	4	5
1	1	3	2	3	2	3	2	3	3	2	11	2	2	2	2	2	2	3	8	3	2	2	2	2	2	2	2	1	9	2	1	2	2	2	1	1	2	2	1	1	2	3	2	2	2	2	30	8	5
2	1	3	2	2	2	3	2	2	2	2	8	2	1	1	1	1	1	1	1	1	1	1	2	1	1	1	1	1	1	1	1	1	2	1	1	1	1	1	1	1	1	1	1	1	1	1	18	6	4
2	1	4	2	2	1	3	2	1	3	3	8	2	2	1	1	1	1	1	2	1	1	1	1	1	1	2	1	1	1	2	1	3	1	1	1	1	1	1	1	1	2	1	1	1	2	1	22	8	2
2	1	3	2	3	2	2	3	2	2	2	9	2	2	2	1	1	2	2	5	1	2	2	1	1	2	1	1	1	3	1	1	2	1	1	1	1	1	1	1	1	2	2	1	1	2	1	21	7	4
2	1	3	2	3	2	3	2	3	3	3	12	2	2	2	2	1	1	2	5	2	2	1	1	2	1	1	1	1	3	2	1	2	3	2	2	2	2	2	2	2	2	1	2	2	2	2	33	9	5
2	1	3	2	1	2	2	1	1	2	1	3	1	1	1	1	1	1	1	0	1	1	2	2	1	1	1	1	1	2	1	1	1	1	1	1	1	1	1	1	1	1	1	1	1	1	1	17	4	3
2	1	3	2	3	1	3	2	3	2	2	9	2	1	1	1	1	2	1	2	2	2	2	2	2	2	2	2	1	8	2	1	1	2	1	1	1	1	2	2	1	1	1	1	1	2	1	22	7	4
1	1	3	2	1	2	2	2	3	2	1	6	1	1	1	1	1	1	1	0	1	1	1	2	1	1	1	1	1	1	2	1	2	1	1	1	1	1	1	1	1	1	1	1	1	1	1	19	4	5
2	1	3	2	2	2	2	2	2	2	2	7	2	1	2	1	1	1	1	2	1	1	1	1	1	1	1	1	1	0	1	1	1	1	1	1	1	1	1	1	1	1	1	1	1	1	1	17	6	4
1	1	3	2	3	3	3	3	3	3	3	14	2	2	2	2	2	2	2	7	2	2	2	2	2	2	2	2	2	9	2	2	2	2	2	2	2	5	3	2	4	2	2	2	2	2	2	40	9	6
2	1	3	2	1	3	3	1	1	1	1	4	1	1	1	1	1	1	1	0	1	1	1	1	1	1	1	1	1	0	1	1	1	1	1	1	1	1	1	1	1	1	1	1	1	1	1	17	3	4
2	1	3	2	3	1	3	2	2	2	2	8	2	2	1	1	1	1	1	2	2	1	1	1	2	1	2	1	1	3	1	2	2	1	1	1	1	1	1	1	1	1	1	1	1	3	1	21	7	3
2	1	4	2	2	2	3	3	2	2	1	8	1	2	1	1	1	2	1	2	1	1	1	1	1	1	1	1	1	0	1	2	1	1	1	1	1	2	1	1	1	2	1	2	1	2	1	22	5	4
2	1	2	2	3	2	4	3	3	3	3	14	3	2	3	3	3	2	3	12	3	2	3	3	1	2	1	1	1	8	1	1	1	1	1	2	2	1	2	2	2	2	1	2	2	2	1	26	9	5
1	1	2	2	1	1	1	1	1	1	1	0	1	1	3	1	2	1	1	3	1	1	1	1	1	1	1	1	1	0	1	1	1	1	1	1	1	1	1	1	1	1	1	1	1	1	1	17	3	2
2	1	2	2	2	1	3	1	3	1	1	5	1	1	1	1	1	1	1	0	2	1	1	1	1	1	1	1	1	1	1	1	1	1	1	1	1	1	1	1	1	1	1	1	1	1	1	17	4	4
2	1	2	2	1	2	2	2	2	2	2	6	2	2	2	1	1	1	2	4	1	1	1	1	1	1	1	1	1	0	1	1	2	2	1	1	1	1	1	1	1	1	1	1	1	1	1	19	5	4
2	1	3	2	3	2	3	1	1	1	1	5	2	1	1	2	1	2	1	3	3	2	2	3	3	2	3	3	1	13	1	1	2	1	1	1	1	2	2	3	3	4	3	3	3	2	3	36	5	3
1	1	4	2	2	2	2	2	2	2	2	7	1	1	1	1	1	1	1	0	1	1	1	1	1	1	1	1	1	0	1	1	1	1	1	1	1	1	1	1	1	1	1	1	1	1	1	17	6	4
1	1	3	2	3	2	3	2	2	3	2	10	2	2	1	2	1	2	2	5	1	2	3	2	1	1	1	1	1	4	2	1	1	1	1	1	1	1	1	1	1	1	3	1	1	3	2	23	8	4
2	1	3	2	1	2	2	2	4	3	2	9	1	1	1	1	1	1	1	0	1	1	1	1	2	1	2	1	1	2	1	1	1	1	1	1	1	2	1	1	1	1	1	1	1	1	1	18	6	6
2	1	3	2	2	2	2	2	1	1	1	4	1	1	1	1	1	1	1	0	1	2	2	2	1	1	1	2	1	4	1	1	1	1	1	1	1	1	1	2	2	1	2	1	1	2	1	21	4	3
2	1	3	2	2	1	3	2	1	3	2	7	3	2	2	2	1	2	2	7	4	2	2	2	2	2	1	2	1	9	2	2	3	3	1	1	2	1	2	1	2	2	2	2	2	1	2	31	7	2
2	1	3	2	1	1	2	1	2	2	2	4	1	1	1	1	1	1	1	0	1	1	1	1	1	1	1	1	1	0	1	1	2	1	1	1	1	1	1	1	1	1	2	2	2	3	2	24	5	3
2	1	3	2	3	1	3	3	1	2	2	8	2	2	1	2	1	2	1	4	2	1	2	2	1	1	1	1	1	3	1	1	2	2	1	1	1	1	1	1	1	1	1	1	1	2	2	21	7	2
2	1	3	2	1	2	3	2	2	3	2	8	1	1	2	1	1	1	1	1	1	1	1	1	1	1	1	1	1	0	1	1	2	1	1	1	1	1	1	1	1	1	3	1	1	2	1	21	6	4
2	1	3	2	1	1	4	2	4	2	2	9	2	1	1	1	1	1	2	2	1	1	2	2	1	1	1	1	1	2	1	1	2	2	1	1	1	1	1	1	1	2	2	1	1	2	1	22	5	5
2	1	3	2	4	1	3	1	1	3	1	7	2	1	1	1	1	2	1	2	2	2	2	2	1	2	2	2	1	7	1	1	1	1	1	1	1	1	1	1	1	1	2	2	2	2	1	21	8	2
1	1	3	2	2	1	4	2	5	2	1	10	1	1	1	1	1	1	1	0	1	1	1	1	1	1	1	1	1	0	1	1	1	1	1	1	1	1	1	1	1	1	1	1	1	1	1	17	5	6
2	1	3	2	3	3	3	3	2	3	2	12	2	2	1	1	1	1	1	2	1	1	1	2	1	1	1	1	1	1	1	1	1	2	1	1	1	1	1	1	1	1	1	1	2	1	1	19	8	5
2	1	2	2	2	1	3	2	1	2	2	6	1	2	2	1	1	2	1	3	1	1	1	1	1	1	1	1	1	0	1	1	1	1	1	1	1	1	1	1	1	1	1	2	2	1	1	19	6	2
2	1	3	2	2	3	3	2	2	2	2	9	2	3	3	3	2	2	2	10	2	3	2	2	2	3	2	2	1	10	2	1	2	2	1	1	1	1	2	2	2	2	1	2	2	2	3	29	6	5
2	1	4	2	3	3	4	2	2	2	2	11	1	1	1	1	1	1	1	0	2	1	3	2	2	1	1	1	1	5	1	1	1	1	1	1	1	1	1	2	1	2	3	2	3	2	1	25	7	5
2	1	3	2	1	1	1	1	1	1	1	0	1	1	1	1	1	1	1	0	1	1	1	1	1	1	1	1	1	0	1	1	1	1	1	1	1	1	1	1	1	1	1	1	1	1	1	17	3	2
1	1	4	2	2	3	2	1	2	2	1	6	1	1	2	1	1	1	1	1	1	1	1	1	1	1	1	1	1	0	1	1	2	1	1	1	1	1	1	2	1	1	1	1	1	1	1	19	5	5
2	1	3	1	1	3	2	2	1	1	2	5	2	1	2	2	1	2	1	4	2	2	2	2	1	1	2	1	1	5	1	1	1	1	1	1	1	2	1	2	2	2	2	2	2	2	1	25	4	4
1	1	3	2	2	3	3	2	2	3	2	10	1	1	2	1	1	2	2	3	2	1	2	2	1	1	1	1	1	3	2	1	1	1	1	1	1	1	1	1	1	1	3	3	2	3	2	26	7	5
1	1	3	1	1	1	1	1	1	2	1	1	1	1	1	1	1	1	1	0	1	1	1	1	1	1	1	1	1	0	1	1	2	1	1	1	1	1	1	1	1	1	1	1	1	1	1	18	4	2
2	1	3	2	2	2	3	2	2	2	2	8	1	1	1	1	1	1	1	0	1	1	1	1	1	1	1	1	1	0	1	1	1	1	1	1	1	1	1	1	1	1	1	1	1	1	1	17	6	4
1	1	4	2	2	2	2	2	2	2	2	7	1	1	1	1	1	1	1	0	1	1	1	1	1	1	1	1	1	0	1	1	1	1	1	1	1	1	1	1	1	1	1	1	1	1	1	17	6	4
2	1	3	2	3	1	3	2	1	3	1	7	2	2	2	2	1	2	1	5	1	1	1	1	1	1	1	1	1	0	1	1	1	1	1	1	1	1	1	1	1	1	1	1	1	1	1	17	7	2
2	1	4	2	3	3	4	3	2	3	3	14	3	4	3	2	2	1	2	10	2	2	2	2	1	1	1	1	1	4	2	1	2	2	1	1	1	1	1	1	1	2	1	1	2	2	1	23	9	5
2	1	3	2	3	3	1	2	2	4	3	11	2	3	2	2	1	2	2	7	2	2	2	2	2	3	2	2	1	9	1	1	2	1	1	1	2	1	1	1	1	1	2	2	2	1	1	22	10	5
2	1	2	2	3	1	3	3	3	3	2	11	2	2	2	2	2	2	2	7	1	2	2	1	2	2	2	1	1	5	2	1	2	2	1	1	1	1	1	1	1	1	1	1	1	1	1	20	8	4
2	1	3	2	1	2	2	1	2	2	2	5	2	1	2	1	1	2	1	3	2	1	2	2	2	2	2	2	1	7	1	1	2	2	1	1	1	1	1	1	1	1	2	2	2	1	1	22	5	4
2	1	3	2	2	2	1	1	3	2	1	5	2	1	2	1	1	1	1	2	2	1	2	2	2	1	1	1	1	4	1	1	1	1	1	1	1	2	1	1	1	1	2	1	1	1	1	19	5	5
2	1	3	2	1	1	4	2	2	1	1	5	1	1	1	1	1	1	1	0	1	1	1	1	1	1	1	1	1	0	1	1	1	1	1	1	1	1	1	1	1	1	1	1	1	1	1	17	3	3
1	1	3	2	2	1	4	1	1	2	1	5	1	1	2	1	1	1	2	2	1	1	1	2	1	1	2	1	1	2	1	1	1	1	1	1	1	1	1	1	1	1	1	1	1	1	1	17	5	2
2	1	3	2	1	1	2	2	1	1	1	2	1	1	2	1	1	1	1	1	1	1	1	1	1	1	1	1	1	0	1	1	1	1	1	1	1	1	1	1	1	1	1	1	1	1	1	17	3	2
2	1	3	2	2	2	3	2	1	1	1	5	2	1	1	1	1	1	1	1	1	1	1	1	1	1	1	1	1	0	1	1	1	1	1	1	1	1	1	1	1	1	1	1	1	1	1	17	4	3
2	1	3	2	3	3	2	2	2	3	1	9	1	2	2	1	1	2	1	3	1	1	1	1	1	1	1	1	1	0	1	1	1	1	1	1	1	1	1	1	1	2	1	1	2	3	1	21	7	5
2	1	3	2	3	2	3	2	2	3	3	11	2	1	2	1	2	2	1	4	1	1	2	1	2	1	3	2	1	5	2	1	2	1	1	1	1	1	1	1	1	1	3	2	2	2	1	24	9	4
2	1	2	2	2	2	3	2	1	3	2	8	2	2	2	2	1	2	2	6	2	2	3	2	1	1	1	1	1	5	2	2	2	2	1	1	1	1	1	1	1	1	2	2	1	1	2	24	7	3
2	1	3	2	3	1	3	3	3	4	3	13	3	2	2	2	2	2	2	8	2	2	2	2	2	2	2	2	2	9	2	1	1	2	2	2	1	2	1	1	1	1	1	1	1	2	1	23	10	4
2	1	3	2	1	2	4	2	3	3	2	10	1	1	1	1	1	1	1	0	2	1	2	1	1	1	1	1	1	2	1	1	1	1	1	1	1	1	1	1	1	1	1	1	1	2	1	18	6	5
2	1	2	2	3	2	3	3	2	2	2	10	2	2	2	2	2	2	2	7	2	2	2	2	2	2	2	2	2	9	2	2	2	2	2	2	2	2	2	2	2	2	2	2	2	2	2	34	7	4
2	1	3	2	2	1	4	3	2	3	2	10	1	1	1	1	1	1	1	0	1	1	1	1	1	1	1	1	1	0	1	1	1	2	1	1	1	1	1	1	1	1	1	1	1	1	1	18	7	3
2	1	4	2	2	3	2	2	3	3	3	11	2	2	2	2	2	2	2	7	2	2	2	2	2	2	2	2	2	9	2	1	2	2	2	2	2	2	2	2	1	2	1	2	2	2	2	31	8	6
2	1	3	2	1	4	2	1	1	1	1	4	1	1	1	1	1	1	1	0	1	1	1	1	1	1	1	1	1	0	1	1	1	1	1	1	1	1	1	1	1	1	1	1	1	1	1	17	3	5
1	1	2	2	1	1	3	1	2	2	1	4	1	1	1	1	1	1	1	0	1	1	1	1	1	1	1	1	1	0	1	1	1	1	1	1	1	1	1	1	1	1	1	1	1	1	1	17	4	3
1	1	2	2	2	3	2	2	3	3	1	9	1	1	2	1	1	1	1	1	1	1	1	1	1	1	1	1	1	0	1	1	1	1	1	1	1	1	1	1	1	1	1	1	1	1	1	17	6	6
1	1	2	2	1	1	3	1	1	1	1	2	1	1	1	1	1	1	1	0	1	1	1	1	1	1	1	1	1	0	2	1	1	1	1	1	1	1	1	1	1	1	1	1	1	2	1	19	3	2
1	1	2	2	3	3	2	3	3	3	3	13	2	1	1	1	1	2	1	2	2	2	2	2	1	1	2	2	1	6	2	1	1	2	1	1	1	2	2	2	1	1	1	2	2	2	1	25	9	6
1	1	4	2	4	2	4	3	3	4	2	15	3	3	2	2	2	3	2	10	2	2	3	2	2	2	3	3	3	13	1	1	1	2	3	3	2	1	2	1	1	1	2	3	2	3	3	32	10	5
1	1	3	2	1	1	1	1	1	1	1	0	2	1	1	1	1	1	1	1	1	1	4	2	3	1	1	1	1	6	1	1	1	1	1	1	1	1	1	1	1	1	2	1	2	1	1	19	3	2
2	1	3	2	1	1	3	1	1	2	1	3	2	2	2	1	1	1	2	4	1	1	1	1	1	1	1	1	1	0	2	1	1	1	1	1	1	1	1	3	1	2	1	1	1	2	1	22	4	2
1	1	2	2	1	1	5	1	1	1	1	4	1	1	1	1	1	1	1	0	1	1	1	1	1	1	1	1	1	0	1	1	1	1	1	1	1	1	1	1	1	1	1	1	1	1	1	17	3	2
1	1	3	2	1	1	1	1	1	1	1	0	1	1	1	1	1	1	1	0	1	1	1	1	1	1	1	1	1	0	1	1	1	1	1	1	1	1	1	1	1	1	1	1	1	1	1	17	3	2
2	1	3	2	2	3	3	2	2	2	2	9	2	1	2	2	1	2	1	4	2	2	2	2	2	2	2	2	1	8	2	1	1	2	1	1	1	2	2	1	2	2	2	4	2	2	2	30	6	5
2	1	2	2	3	2	2	3	2	3	2	10	2	2	2	2	1	1	2	5	1	1	3	3	2	1	1	1	1	5	1	1	2	2	1	1	1	1	1	1	1	1	2	1	1	2	2	22	8	4
1	1	1	2	2	2	1	3	2	3	3	9	2	2	1	1	1	1	2	3	1	1	2	2	3	1	1	2	1	5	2	1	2	2	1	1	1	2	1	2	1	2	2	1	1	3	1	26	8	4
2	1	3	2	2	4	4	3	3	3	3	15	2	2	2	2	2	2	2	7	1	2	1	1	1	1	1	1	1	1	3	1	2	2	1	1	1	1	1	1	1	1	3	3	3	3	3	31	8	7
2	1	1	2	3	1	3	3	3	3	3	12	2	2	2	2	1	2	2	6	2	1	2	2	1	1	1	2	1	4	2	1	2	2	1	1	1	1	1	2	1	1	2	2	1	2	2	25	9	4
2	1	4	2	2	1	2	1	1	1	1	2	1	1	1	1	1	1	1	0	1	1	1	1	1	1	1	1	1	0	1	1	1	1	1	1	1	1	1	1	1	1	1	1	1	1	1	17	4	2
2	1	3	2	4	3	4	4	4	3	3	18	2	3	3	2	1	1	2	7	3	3	3	3	2	1	2	2	1	11	2	1	2	2	2	2	1	1	1	1	1	1	2	2	2	2	1	26	10	7
2	1	3	1	3	2	2	2	3	2	2	9	2	3	2	1	1	1	1	4	1	1	1	1	1	1	1	1	1	0	2	1	1	2	1	2	2	1	1	1	1	1	1	1	1	1	1	21	7	5
1	1	4	2	1	1	3	1	1	3	1	4	1	1	2	1	1	1	2	2	1	1	2	1	1	1	1	1	1	1	1	1	2	1	1	1	1	1	1	1	1	1	1	1	1	3	1	20	5	2
1	1	2	2	4	2	4	4	5	4	4	20	2	2	2	2	2	2	2	7	2	2	2	2	2	2	2	2	1	8	2	1	3	2	2	2	2	3	2	1	1	2	2	2	2	3	2	34	12	7
1	1	1	2	3	3	4	3	2	3	3	14	2	3	2	2	2	1	1	6	1	1	1	2	1	1	1	1	1	1	1	1	3	3	2	1	1	2	1	2	1	2	1	1	1	1	1	25	9	5
2	1	3	2	2	1	3	2	1	3	3	8	1	1	1	1	1	1	1	0	1	1	1	1	1	1	1	1	1	0	1	1	1	1	1	1	1	1	1	2	1	1	1	1	1	1	1	18	8	2
2	1	4	2	3	2	4	3	3	3	3	14	2	3	2	2	2	1	3	8	2	2	2	2	3	2	1	1	1	7	2	1	3	2	1	2	2	1	1	2	1	3	1	2	2	3	2	31	9	5
2	1	3	2	1	1	2	1	2	1	1	2	1	1	1	1	1	1	1	0	1	1	1	1	1	1	1	1	1	0	1	1	1	1	1	1	1	1	1	1	1	1	2	1	1	2	1	19	3	3
2	1	3	2	2	1	1	2	2	2	2	5	2	2	1	1	1	1	2	3	2	1	1	2	1	1	1	1	1	2	1	1	1	1	1	1	1	1	2	1	1	1	1	2	1	2	1	20	6	3
2	1	1	2	1	1	1	1	1	1	1	0	1	1	1	1	1	1	1	0	1	1	1	1	1	1	1	1	1	0	1	1	2	1	1	1	1	1	1	1	1	1	1	1	1	1	1	18	3	2
1	1	2	2	4	3	5	3	5	5	3	21	2	2	3	3	4	3	1	11	3	2	4	3	2	4	4	1	1	15	2	2	1	2	1	2	2	3	5	5	3	3	5	1	3	1	1	42	12	8
2	1	3	2	2	2	3	2	2	1	1	6	1	1	1	1	1	1	1	0	1	1	1	1	1	1	1	1	1	0	1	1	1	1	1	1	1	1	1	1	1	1	1	1	1	1	1	17	4	4
2	1	3	2	3	2	3	2	3	3	3	12	2	1	2	2	1	1	1	3	2	1	2	2	2	1	2	2	1	6	2	2	2	2	1	1	1	1	1	1	1	1	2	2	2	2	2	26	9	5
2	1	3	2	3	3	3	2	2	2	1	9	2	2	2	2	1	1	2	5	1	1	1	1	1	1	1	1	1	0	1	1	1	1	1	1	1	1	1	1	1	1	1	1	1	1	1	17	6	5
2	1	3	2	2	1	2	1	1	1	1	2	2	2	2	2	2	2	2	7	2	1	2	2	2	2	1	2	1	6	2	1	1	1	1	1	1	1	1	2	1	2	3	2	2	2	1	25	4	2
2	1	4	2	5	2	5	5	5	5	5	25	3	4	4	4	3	3	4	18	4	4	2	4	2	3	2	3	1	16	3	2	5	5	2	3	3	2	4	3	3	5	2	4	4	5	5	60	15	7
1	1	3	2	1	1	1	1	1	1	1	0	1	1	1	1	1	1	1	0	1	1	1	1	1	1	1	1	1	0	1	1	1	1	1	1	1	1	1	1	1	1	1	1	1	1	1	17	3	2
1	1	3	2	1	2	4	1	4	2	2	9	2	1	1	2	1	1	1	2	2	1	1	1	1	1	1	1	1	1	1	1	1	1	1	2	1	1	1	1	1	1	1	1	1	1	1	18	5	6
2	1	4	2	2	3	4	2	2	3	2	11	2	2	2	1	1	1	2	4	1	1	1	2	1	1	1	1	1	1	1	1	2	1	1	1	1	1	1	1	1	1	2	1	1	1	1	19	7	5
2	1	3	2	3	3	3	2	2	2	2	10	2	2	2	2	1	1	2	5	1	2	2	1	1	1	1	1	1	2	1	1	1	1	1	1	1	1	1	1	1	1	1	1	1	1	1	17	7	5
2	1	4	1	3	2	3	3	4	3	3	14	2	2	2	1	1	1	2	4	2	2	1	1	1	1	1	2	1	3	2	1	1	2	2	1	1	1	1	1	1	2	1	1	1	4	2	25	9	6
1	1	3	2	1	1	2	2	2	2	2	5	1	1	1	1	1	1	1	0	1	1	2	1	1	1	1	1	1	1	1	1	1	1	1	1	1	1	1	1	1	1	1	1	1	1	1	17	5	3
1	1	3	2	2	3	3	1	1	2	1	6	1	1	1	1	1	1	1	0	1	1	2	1	2	1	1	1	1	2	1	1	1	1	1	1	1	1	1	1	1	1	1	1	1	1	1	17	5	4
2	1	4	2	3	2	2	2	2	2	2	8	1	1	1	1	1	1	1	0	1	1	1	1	1	1	1	1	1	0	1	1	1	1	1	1	1	1	1	1	1	1	1	1	1	1	1	17	7	4
2	1	4	2	3	3	4	2	2	2	2	11	2	1	2	2	1	2	1	4	2	2	2	2	2	2	2	2	2	9	3	2	3	2	2	2	2	2	2	2	2	2	2	2	2	2	2	36	7	5
1	1	3	2	1	4	2	1	1	1	1	4	2	3	2	2	1	1	1	5	2	2	2	3	1	4	1	2	1	9	1	1	1	1	1	1	1	3	1	1	1	2	1	1	1	1	1	20	3	5
2	1	3	2	2	2	4	2	1	3	3	10	2	2	3	2	1	1	2	6	2	2	2	2	2	1	1	1	1	5	2	1	2	2	1	1	1	1	1	1	1	1	2	1	1	2	1	22	8	3
2	1	3	2	1	1	2	2	2	2	2	5	2	2	2	1	1	1	2	4	1	1	1	2	1	1	1	1	1	1	2	1	2	2	1	1	1	2	1	1	1	2	1	1	1	3	1	24	5	3
2	1	2	2	3	3	3	3	4	3	3	15	2	2	2	2	1	1	1	4	1	1	1	1	1	1	1	1	1	0	2	1	1	1	1	1	1	1	1	1	1	1	1	1	1	1	1	18	9	7
2	1	3	2	1	1	5	1	5	1	1	8	1	1	1	1	1	1	1	0	1	1	1	1	1	1	1	1	1	0	1	1	1	1	1	1	1	1	1	1	1	1	1	1	1	1	1	17	3	6
1	1	3	2	3	3	3	2	2	3	2	11	1	1	1	1	1	1	1	0	1	1	1	1	1	1	1	1	1	0	1	1	2	1	2	1	1	1	1	2	1	1	1	1	1	2	1	21	8	5
2	1	3	2	1	1	3	2	1	2	1	4	2	1	2	1	1	2	2	4	2	2	1	2	1	1	1	1	1	3	1	2	1	2	1	1	1	1	1	2	1	2	1	2	1	3	1	24	4	2
1	1	2	2	1	2	3	1	3	1	1	5	1	1	1	1	1	1	1	0	1	1	1	1	1	1	1	1	1	0	1	1	1	1	1	1	1	1	1	1	1	1	1	1	1	1	1	17	3	5
2	1	3	2	3	2	2	3	1	2	1	7	2	1	1	1	1	1	1	1	2	1	1	2	1	1	1	1	1	2	1	1	1	1	1	1	1	1	1	1	1	1	1	1	1	1	1	17	6	3
2	1	3	2	3	2	4	3	4	3	3	15	2	2	3	3	2	3	3	11	3	2	3	3	3	3	3	2	1	14	2	1	2	3	2	2	3	1	2	2	1	3	3	3	3	4	4	41	9	6
2	1	3	2	1	2	5	1	1	1	1	5	1	1	1	1	1	1	1	0	1	1	1	1	1	1	1	1	1	0	1	1	1	1	1	1	1	1	1	1	1	1	1	1	1	1	1	17	3	3
2	1	3	2	4	3	2	4	3	3	3	15	2	2	2	2	1	2	2	6	3	2	2	1	1	1	1	1	1	4	2	1	2	2	1	1	1	1	1	1	1	1	1	2	1	3	3	25	10	6
1	1	3	2	3	2	4	1	4	3	2	12	2	1	1	1	1	1	1	1	1	1	1	1	1	1	2	2	1	2	2	1	1	1	1	2	1	1	1	1	1	1	1	1	1	2	2	21	8	6
1	1	3	2	3	1	3	3	3	1	1	8	1	1	1	1	1	1	1	0	2	2	3	2	1	2	1	1	1	6	1	1	2	2	1	1	1	1	1	1	1	1	2	1	2	2	1	22	5	4
1	1	3	2	1	1	2	1	1	1	1	1	1	1	1	1	1	1	1	0	1	1	1	1	3	1	1	1	1	2	1	1	1	1	1	1	1	1	1	1	1	1	1	2	1	1	1	18	3	2
2	1	3	2	1	1	5	4	3	3	3	13	1	1	2	1	1	1	1	1	1	1	1	1	1	1	1	1	1	0	1	1	1	1	1	1	1	1	1	1	1	1	1	1	1	1	1	17	7	4
2	1	3	2	3	2	3	2	2	3	2	10	2	2	3	3	1	3	2	9	3	3	4	4	4	3	3	3	1	19	2	1	2	1	1	1	1	2	2	4	1	3	4	4	4	4	4	41	8	4
1	1	3	2	3	3	3	3	3	3	3	14	3	3	3	3	3	3	3	14	3	3	3	3	3	3	3	3	3	18	4	4	4	4	4	4	3	3	3	3	3	3	3	3	3	3	3	57	9	6
1	1	3	2	2	3	3	3	2	3	2	11	2	2	2	2	2	2	2	7	2	1	2	2	2	1	1	2	1	5	1	1	2	2	1	1	1	1	1	1	1	2	2	2	2	2	1	24	7	5
2	1	3	2	3	1	1	1	1	1	1	2	1	1	1	1	1	1	1	0	1	1	1	1	4	1	1	1	1	3	1	1	1	1	1	2	1	1	1	1	1	1	1	1	1	1	1	18	5	2
1	1	3	2	2	1	1	2	2	2	1	4	1	1	1	1	1	2	1	1	1	1	1	1	1	1	1	1	1	0	1	1	1	1	1	1	1	1	1	1	1	1	1	1	1	2	1	18	5	3
2	1	4	2	1	1	2	2	2	2	2	5	1	2	1	1	1	1	1	1	2	1	2	2	1	1	1	1	1	3	2	1	2	2	1	1	1	1	1	2	2	2	2	2	2	2	1	27	5	3
2	1	4	2	2	1	5	2	1	2	1	7	2	1	1	1	1	1	2	2	2	2	1	2	2	2	3	2	1	8	2	1	1	2	2	1	2	1	1	1	1	2	1	1	1	3	2	25	5	2
2	1	4	1	3	2	4	2	1	2	2	9	2	1	2	2	2	2	1	5	1	1	1	1	1	1	2	1	1	1	1	1	1	1	1	1	1	1	1	2	1	2	1	1	2	1	1	20	7	3
2	1	3	2	1	1	4	1	2	3	3	8	2	2	2	2	1	2	2	6	2	2	2	2	2	1	1	1	1	5	1	1	2	1	1	1	1	1	1	1	1	1	1	1	1	1	1	18	7	3
1	1	4	1	2	2	2	1	3	2	2	7	2	2	2	2	1	2	2	6	2	2	2	2	1	2	2	2	1	7	1	1	1	2	1	1	1	1	2	2	2	2	2	2	2	1	2	26	6	5
2	1	3	2	1	3	3	1	1	2	1	5	2	1	1	1	1	1	1	1	1	1	1	1	1	1	1	1	1	0	1	1	2	2	1	1	1	2	1	1	1	2	1	1	1	2	1	22	4	4
2	1	3	2	3	1	3	2	4	3	3	12	2	2	2	2	1	1	2	5	3	2	2	2	2	2	3	2	1	10	2	1	2	2	1	2	2	1	2	1	1	2	2	2	2	2	2	29	9	5
1	1	2	2	3	2	4	4	2	3	3	14	4	3	3	3	2	2	2	12	2	2	1	1	2	1	1	2	1	4	2	1	4	2	3	1	2	3	3	4	3	3	2	3	2	3	3	44	9	4
1	1	3	2	2	2	3	2	3	2	2	9	2	2	2	2	2	2	1	6	2	2	2	2	1	2	1	1	1	5	5	1	2	2	1	1	1	1	2	2	1	3	2	1	2	3	1	31	6	5
1	1	3	2	2	2	2	2	2	2	2	7	1	1	1	1	1	1	1	0	1	1	1	2	1	1	1	1	1	1	1	1	1	1	1	1	1	1	1	1	1	2	2	1	1	2	1	20	6	4
2	1	3	2	3	3	3	2	2	2	2	10	2	1	1	2	2	2	1	4	2	2	2	2	1	1	2	1	1	5	2	1	1	1	2	1	1	2	2	1	1	2	2	2	2	2	2	27	7	5
1	1	3	2	2	3	4	2	2	2	2	10	1	1	1	1	1	1	1	0	1	2	2	2	1	2	1	1	1	4	1	1	2	2	1	1	1	2	1	3	1	3	2	1	2	3	1	28	6	5
2	1	2	2	1	1	3	2	2	3	3	8	1	1	1	1	1	1	2	1	2	2	1	2	2	1	2	1	1	5	2	2	2	2	1	1	1	1	1	2	1	2	2	2	2	2	1	27	7	3
1	1	3	2	2	2	3	3	3	3	3	12	2	1	1	2	2	2	2	5	2	3	2	2	3	2	2	2	2	11	2	2	3	2	1	2	3	2	2	3	2	2	3	2	2	3	3	39	8	5
2	1	3	2	2	1	2	2	2	2	2	6	2	1	1	1	1	1	2	2	1	2	1	1	1	1	1	1	1	1	2	1	2	2	1	1	1	1	1	1	1	1	1	1	1	1	1	20	6	3
2	1	3	2	1	1	3	2	3	2	1	6	1	1	1	1	1	1	1	0	1	1	1	1	1	1	1	1	1	0	1	1	2	1	1	1	1	1	1	1	1	1	1	1	1	1	1	18	4	4
2	1	3	2	1	3	5	1	1	1	1	6	1	1	2	1	1	1	1	1	2	1	2	2	2	2	1	1	1	5	1	1	1	1	1	1	1	1	1	1	1	2	2	1	3	3	1	23	3	4
2	1	3	2	1	1	1	1	3	2	1	3	3	3	2	2	1	3	1	8	2	2	2	2	2	1	1	1	1	5	1	1	1	1	1	1	1	1	1	1	1	1	2	2	1	1	1	19	4	4
2	1	3	2	3	2	3	3	3	2	2	11	2	2	2	1	1	2	2	5	2	1	1	2	2	1	1	2	1	4	2	1	2	1	1	1	1	1	1	1	1	2	1	2	1	2	2	23	7	5
2	1	3	2	2	2	3	2	2	2	2	8	1	1	1	1	1	2	1	1	2	1	1	1	1	1	1	1	1	1	2	1	2	2	1	2	2	1	1	1	1	1	1	1	1	2	1	23	6	4
1	1	3	2	1	1	1	1	2	2	2	3	3	2	4	3	1	4	4	14	4	4	4	4	3	3	2	2	1	18	2	1	1	1	1	1	1	1	1	2	1	3	4	4	3	3	2	32	5	3
2	1	3	2	1	1	1	1	1	1	1	0	1	1	1	1	1	1	1	0	1	1	1	1	1	1	1	1	1	0	1	1	1	1	1	1	1	1	1	1	1	1	1	1	1	1	1	17	3	2
2	1	3	2	2	2	2	2	2	2	2	7	3	3	2	2	2	2	2	9	3	3	3	2	2	2	2	2	2	12	2	2	2	2	2	2	2	2	2	2	2	2	2	2	2	2	2	34	6	4
2	1	3	2	4	3	5	4	4	4	3	20	4	3	4	4	3	3	3	17	4	4	4	4	3	4	4	4	2	24	3	3	3	3	3	3	2	2	4	4	5	5	4	5	4	4	3	60	11	7
2	1	3	2	1	1	4	1	1	2	2	5	2	2	4	2	1	2	2	8	1	1	1	1	1	2	2	1	1	2	1	1	3	2	1	1	1	1	1	1	1	2	1	2	2	4	3	28	5	2
2	1	3	2	1	1	2	2	2	1	1	3	2	1	2	1	1	1	1	2	1	1	1	1	1	1	1	1	1	0	1	1	1	1	1	1	1	1	1	1	1	1	1	1	1	1	1	17	3	3
2	1	3	2	2	2	4	4	2	3	3	13	2	2	3	2	1	1	1	5	1	1	1	1	1	1	1	1	1	0	1	1	1	1	1	1	1	1	1	1	1	1	1	1	1	1	1	17	8	4
2	1	2	2	3	2	4	4	4	4	3	17	3	3	3	3	1	4	3	13	4	4	4	4	3	4	4	4	4	26	2	4	3	1	1	1	2	1	3	5	5	5	5	5	4	4	5	56	10	6
2	1	3	2	1	1	1	1	1	1	1	0	1	1	1	1	1	1	1	0	1	1	1	1	1	1	1	1	1	0	1	1	1	1	1	1	1	1	1	1	1	1	1	1	1	1	1	17	3	2
2	1	3	2	1	1	1	1	1	1	1	0	1	1	1	1	1	1	1	0	1	1	1	1	1	1	1	1	1	0	1	1	1	1	1	1	1	1	1	1	1	1	1	1	1	3	1	19	3	2
2	1	3	2	1	2	1	2	1	3	2	5	1	1	1	1	1	1	1	0	2	1	1	1	1	1	2	1	1	2	1	1	1	1	1	1	1	1	2	2	1	2	1	2	2	2	1	23	6	3
2	1	3	2	1	1	1	1	1	1	1	0	1	1	1	1	1	1	1	0	1	1	1	1	1	1	1	1	1	0	1	1	1	1	1	1	1	1	1	1	1	1	1	1	1	2	1	18	3	2
1	1	3	2	1	2	3	1	2	1	1	4	1	1	1	1	1	1	1	0	1	1	1	1	1	1	1	1	1	0	1	1	2	1	1	1	1	1	1	1	1	1	1	1	1	1	1	18	3	4
2	1	3	2	2	1	2	1	2	3	2	6	2	1	2	2	1	1	1	3	2	2	3	2	3	1	1	1	1	7	2	2	2	2	1	1	1	1	1	3	3	2	4	1	1	2	1	30	7	3
2	1	3	2	2	1	3	3	2	2	2	8	2	1	3	3	3	3	1	9	2	2	2	3	2	3	3	2	1	11	2	1	1	1	1	2	3	2	1	2	1	2	2	3	2	3	1	30	6	3
2	1	1	2	4	1	1	2	1	4	3	9	2	2	2	2	1	1	2	5	2	2	1	2	2	1	1	1	1	4	1	1	1	2	2	2	2	2	1	1	1	2	1	1	1	1	1	23	11	2
1	1	3	2	1	3	2	2	2	5	5	13	1	1	1	1	1	1	1	0	2	1	1	1	1	2	2	1	1	3	1	1	1	1	1	1	1	1	1	1	1	1	1	1	1	1	1	17	11	5
2	1	3	2	1	2	3	3	3	3	3	11	2	2	2	2	2	2	2	7	2	1	1	1	2	1	1	1	1	2	1	1	1	1	1	1	1	1	1	1	1	1	1	1	1	1	1	17	7	5
1	1	3	2	1	1	1	1	4	1	1	3	1	1	1	1	1	1	1	0	1	1	1	1	1	1	1	1	1	0	1	1	1	1	1	1	1	1	1	1	1	1	1	2	1	2	1	19	3	5
1	1	2	2	2	1	3	3	2	2	2	8	1	1	2	1	1	1	2	2	1	1	2	1	1	1	1	1	1	1	1	1	1	1	2	1	1	1	1	2	1	1	2	1	1	2	1	21	6	3
2	1	3	2	4	3	3	3	4	4	4	18	2	1	1	1	1	2	1	2	2	2	1	2	2	1	1	1	1	4	2	1	2	1	1	1	1	1	1	2	1	1	1	2	1	1	1	21	12	7
2	1	2	2	2	2	2	1	1	2	1	4	2	1	1	2	1	1	1	2	2	1	2	2	1	1	1	1	1	3	1	1	1	1	1	1	1	1	1	1	1	1	1	1	1	1	1	17	5	3
2	1	4	2	3	2	3	3	2	3	2	11	2	2	2	2	2	2	2	7	2	2	2	3	3	2	2	2	1	10	2	1	2	2	2	2	2	2	2	1	1	1	2	2	2	2	1	29	8	4
2	1	3	2	1	2	4	3	3	2	2	10	1	1	1	1	1	1	1	0	1	1	1	1	1	1	1	1	1	0	2	1	1	2	1	1	1	1	1	1	1	1	1	1	1	1	1	19	5	5
2	1	4	2	2	1	2	2	2	2	2	6	1	1	1	1	1	1	1	0	2	2	1	1	1	1	1	1	1	2	1	1	2	2	1	2	2	1	1	2	1	1	1	1	1	1	1	22	6	3
1	1	3	2	3	3	2	4	2	4	2	13	1	1	1	1	1	1	1	0	1	1	1	1	1	1	1	1	1	0	2	1	1	2	1	1	1	1	1	1	1	1	1	1	1	1	1	19	9	5
1	1	3	2	1	1	3	1	2	1	1	3	1	1	2	2	1	1	1	2	1	1	2	1	3	1	1	1	1	3	1	1	1	1	1	1	1	1	1	1	1	1	1	1	1	1	1	17	3	3
2	1	3	2	3	1	4	1	2	3	2	9	2	2	2	2	1	2	2	6	3	2	2	3	2	2	1	1	1	8	2	1	1	1	1	1	1	1	1	2	1	3	2	3	2	2	3	28	8	3
1	1	3	2	1	1	1	1	1	3	1	2	1	1	2	1	1	1	1	1	1	1	1	1	1	1	1	1	1	0	1	1	2	1	1	1	1	1	1	1	1	1	1	1	1	1	1	18	5	2
2	1	3	2	3	2	2	3	2	3	3	11	2	2	2	2	2	2	2	7	2	2	2	1	1	2	1	2	1	5	2	2	3	2	2	2	2	2	1	1	1	2	2	2	2	2	2	32	9	4
2	1	3	2	2	2	2	2	2	3	2	8	2	1	2	2	1	2	2	5	2	1	2	2	1	1	1	1	1	3	2	1	1	1	1	1	1	1	1	1	1	1	2	1	1	2	1	20	7	4
1	1	2	2	3	3	5	4	5	4	3	20	3	3	3	3	3	3	3	14	2	3	2	2	2	2	2	3	1	10	5	3	2	2	2	2	2	2	2	3	3	3	3	2	2	3	2	43	10	8
1	1	3	2	2	3	3	2	2	3	2	10	2	2	2	2	1	1	2	5	3	2	2	3	1	2	2	2	2	10	3	2	3	2	2	2	2	2	3	2	2	2	2	2	2	2	3	38	7	5
2	1	3	2	2	2	3	3	4	3	2	12	2	1	2	2	1	2	4	7	1	1	1	2	1	1	1	1	1	1	1	1	1	1	1	2	1	1	1	2	1	1	1	2	1	2	1	21	7	6
1	1	3	2	2	1	3	2	2	1	1	5	1	1	1	1	1	1	1	0	1	1	1	1	1	2	1	1	1	1	1	1	1	1	2	2	1	2	2	1	2	2	2	1	2	2	2	27	4	3
1	1	3	2	2	2	5	3	3	3	3	14	2	2	2	2	2	1	1	5	2	2	3	2	2	1	1	2	1	7	2	2	3	2	1	2	3	1	1	2	2	2	2	1	2	2	1	31	8	5
1	1	3	2	3	2	2	1	1	2	2	6	2	1	2	1	1	1	2	3	2	2	2	2	2	2	2	1	1	7	1	1	1	2	1	1	1	3	1	2	2	2	2	2	1	3	1	27	7	3
2	1	3	2	3	2	3	2	3	2	2	10	1	1	1	1	1	1	1	0	1	1	1	1	2	1	2	1	1	2	1	1	1	1	1	1	1	2	1	1	1	1	1	1	1	1	1	18	7	5
1	1	3	2	5	5	5	5	5	5	5	28	4	4	4	4	4	4	4	21	4	4	4	4	4	4	4	4	4	27	5	5	5	5	5	5	5	5	5	5	5	5	5	5	5	5	5	85	15	10
2	1	3	2	1	1	3	1	1	1	1	2	1	3	2	1	1	1	1	3	1	1	1	1	1	1	1	1	1	0	2	1	2	2	1	1	1	1	1	1	1	1	1	1	1	1	1	20	3	2
1	1	3	2	2	1	3	2	1	2	2	6	2	1	2	1	1	1	1	2	1	1	2	2	1	1	1	1	1	2	1	1	2	2	1	1	1	1	1	1	1	1	1	1	1	1	1	19	6	2
1	1	3	2	2	1	3	2	1	2	2	6	1	1	1	1	1	1	1	0	2	1	1	1	1	1	1	1	1	1	2	1	3	1	1	1	1	1	1	2	1	2	1	1	1	2	1	23	6	2
2	1	3	2	2	3	4	1	2	3	2	10	2	1	1	2	2	2	2	5	2	2	2	2	2	2	2	1	2	8	2	1	2	2	1	1	1	1	1	1	1	1	2	1	2	1	2	23	7	5
1	1	4	2	2	1	3	3	3	2	2	9	2	2	2	1	1	1	2	4	2	1	1	2	1	1	1	1	1	2	2	1	2	2	1	1	1	1	1	2	1	1	1	2	1	2	1	23	6	4
2	1	3	2	4	2	3	1	1	3	2	9	1	1	1	1	1	1	1	0	2	1	2	2	2	1	1	1	1	4	1	1	2	1	1	1	1	1	1	2	2	2	2	2	1	3	1	25	9	3
2	1	4	1	3	1	3	2	2	3	2	9	2	2	2	1	1	1	1	3	1	1	1	1	1	1	1	1	1	0	1	1	1	2	1	1	1	1	1	2	1	1	1	1	1	2	1	20	8	3
2	1	3	2	2	1	3	1	3	2	1	6	1	1	2	1	1	1	1	1	1	1	1	1	1	1	1	1	1	0	1	1	1	1	1	1	1	2	1	1	1	1	1	1	1	1	1	18	5	4
2	1	3	2	2	1	4	3	3	1	1	8	1	1	1	1	1	1	1	0	1	1	1	1	1	1	1	1	1	0	1	1	2	2	1	1	1	1	1	1	1	1	1	1	1	1	1	19	4	4
1	1	3	2	3	1	4	3	3	3	3	13	3	3	3	3	2	2	3	12	2	2	3	2	1	1	2	1	1	6	2	2	2	2	3	1	1	1	1	1	1	2	3	2	2	2	1	29	9	4
1	1	3	2	1	1	3	1	1	3	1	4	2	2	2	2	2	2	2	7	1	2	2	1	1	2	2	1	2	5	1	2	1	2	1	2	1	2	1	2	1	2	1	2	1	2	2	26	5	2
2	1	3	2	1	1	3	1	1	1	1	2	1	1	1	1	1	1	1	0	2	1	1	2	1	1	1	1	1	2	1	1	1	1	1	1	1	1	1	1	1	1	1	1	1	1	1	17	3	2
2	1	3	2	1	2	1	1	2	4	1	5	1	1	1	1	1	1	1	0	1	1	2	1	1	1	1	1	1	1	1	1	1	1	1	1	1	1	1	1	1	1	2	1	1	2	1	19	6	4
1	1	2	2	3	3	5	2	1	3	1	11	4	1	1	3	4	4	3	13	4	4	4	4	4	1	4	4	4	24	1	1	5	5	1	1	1	5	5	5	1	5	5	5	5	1	5	57	7	4
2	1	3	2	3	2	3	2	2	2	2	9	2	1	2	1	1	2	2	4	2	2	2	2	2	1	1	1	1	5	1	1	2	2	1	2	1	1	2	1	1	2	1	1	2	3	2	26	7	4
2	1	3	2	2	2	3	2	2	3	2	9	2	2	2	1	1	1	1	3	1	1	1	1	1	1	1	1	1	0	1	1	1	1	1	1	1	1	1	1	1	1	1	1	1	2	2	19	7	4
2	1	3	2	2	1	1	1	1	1	1	1	2	1	1	1	1	1	1	1	2	1	1	2	1	1	1	1	1	2	1	1	2	1	1	1	1	1	1	1	1	1	1	1	1	1	1	18	4	2
2	1	3	2	1	3	3	2	1	2	1	6	2	1	1	1	1	1	2	2	3	1	1	2	1	1	3	1	1	5	2	1	2	2	2	1	1	1	1	1	1	2	2	1	2	2	1	25	4	4
1	1	3	2	3	2	3	2	3	3	3	12	2	2	2	1	2	2	2	6	2	2	2	2	2	2	2	2	2	9	2	2	2	2	2	2	2	2	2	2	2	2	2	2	2	2	2	34	9	5
2	1	3	2	2	2	4	2	4	2	2	11	1	1	1	1	1	1	1	0	1	1	1	1	1	1	1	1	1	0	1	1	1	1	1	1	1	1	1	1	1	1	1	1	1	1	1	17	6	6
2	1	4	2	2	2	2	3	2	3	3	10	2	2	2	2	1	2	2	6	2	2	2	2	2	3	2	1	1	8	3	1	3	3	1	3	3	2	1	1	1	3	1	4	1	3	2	36	8	4
2	1	3	1	3	2	3	2	3	3	2	11	2	2	1	1	1	1	2	3	1	1	1	1	1	1	1	1	1	0	2	1	2	2	1	1	2	1	1	2	1	1	1	1	1	2	1	23	8	5
1	1	2	2	2	1	2	1	2	1	1	3	1	1	1	1	1	1	1	0	1	1	1	1	1	1	1	1	1	0	1	1	1	1	1	1	1	1	1	1	1	1	1	1	1	1	1	17	4	3
1	1	2	2	3	3	3	1	1	1	1	6	1	1	1	1	1	1	1	0	1	1	1	2	1	1	1	1	1	1	1	1	1	1	1	1	1	1	1	1	1	1	1	1	1	1	1	17	5	4
1	1	2	2	2	1	2	2	2	2	2	6	1	1	1	1	1	1	1	0	1	1	1	1	1	1	1	1	1	0	2	1	1	1	1	1	1	1	1	2	1	1	1	1	1	2	1	20	6	3
2	1	3	2	1	1	2	2	1	2	2	4	1	1	1	1	1	1	1	0	1	1	1	1	1	1	1	1	1	0	1	1	1	1	1	1	1	1	1	1	1	1	1	1	1	1	1	17	5	2
1	1	3	2	1	1	1	1	1	1	1	0	1	1	1	1	1	1	1	0	1	1	1	1	1	1	1	1	1	0	1	1	1	1	1	1	1	1	1	2	1	1	1	1	1	2	1	19	3	2
2	1	3	2	3	2	3	3	2	3	3	12	2	1	2	1	1	2	2	4	1	1	1	1	1	1	1	1	1	0	1	1	1	1	1	1	1	1	1	1	1	1	1	1	1	3	2	20	9	4
1	1	3	2	2	1	3	3	2	2	1	7	1	1	2	1	1	1	2	2	3	2	2	3	1	1	1	1	1	6	1	1	1	1	1	1	1	1	1	1	1	2	1	1	1	1	1	18	5	3
1	1	4	2	2	2	3	2	2	2	2	8	1	1	1	1	1	1	1	0	2	2	1	1	1	1	1	1	1	2	1	1	1	1	1	1	1	1	1	1	1	1	1	1	1	1	1	17	6	4
1	1	3	2	2	2	4	2	3	3	2	11	2	2	2	2	2	3	1	7	2	2	3	3	2	3	2	3	1	12	2	1	2	1	1	1	1	1	2	2	2	2	3	3	3	3	3	33	7	5
2	1	3	2	3	1	3	3	2	3	2	10	2	1	1	2	1	1	2	3	2	1	1	2	2	1	1	1	1	3	1	1	1	1	1	1	1	1	1	1	1	1	1	1	1	1	1	17	8	3
2	1	3	2	1	1	2	1	1	1	1	1	1	1	1	1	1	1	1	0	1	1	1	1	1	1	1	1	1	0	1	1	1	1	1	1	1	1	1	1	1	1	1	1	1	1	1	17	3	2
1	1	3	2	2	2	2	2	2	2	2	7	1	1	1	1	1	1	1	0	1	1	1	1	1	1	1	1	1	0	3	2	2	2	3	3	3	3	3	3	3	3	3	2	2	2	2	44	6	4
2	1	3	2	3	2	2	2	2	2	2	8	2	1	1	2	1	2	2	4	1	2	2	1	1	1	2	1	1	3	1	1	1	2	2	1	1	2	1	2	1	2	2	1	2	1	1	24	7	4
1	1	3	2	2	2	3	2	2	2	2	8	2	1	1	1	1	1	1	1	2	1	1	2	1	1	1	1	1	2	1	1	1	1	1	1	1	1	2	2	1	1	1	1	2	2	1	21	6	4
1	1	3	2	4	2	3	2	1	2	1	8	2	2	2	1	1	1	1	3	1	2	3	2	2	3	1	1	1	7	1	1	1	1	1	1	1	1	1	1	1	3	3	1	1	3	1	23	7	3
1	1	4	2	1	1	1	1	1	1	1	0	1	1	1	1	1	1	1	0	1	1	1	1	1	1	1	1	1	0	1	1	1	1	1	1	1	1	1	1	1	1	1	1	1	1	1	17	3	2
1	1	4	2	3	3	4	3	3	3	2	14	2	1	2	1	1	1	1	2	1	1	1	1	1	1	1	1	1	0	1	1	1	1	1	1	1	1	1	3	1	2	1	1	1	1	1	20	8	6
1	1	3	2	5	3	4	3	3	4	2	17	1	1	2	2	1	1	1	2	2	1	1	1	1	2	2	1	1	3	1	1	2	2	2	1	1	1	2	2	2	1	1	2	2	1	1	25	11	6
1	1	4	1	5	3	2	5	2	4	5	19	2	1	3	2	1	2	2	6	1	1	1	2	2	1	1	2	1	3	1	1	1	1	1	1	1	2	1	1	1	1	1	2	1	3	1	21	14	5
1	1	3	2	3	3	4	3	3	4	4	17	2	3	3	3	2	2	2	10	3	3	4	3	3	3	2	2	1	15	3	2	2	3	3	3	2	2	2	3	1	2	5	2	2	3	2	42	11	6
2	1	1	2	3	2	3	3	2	2	2	10	2	1	3	3	1	3	2	8	2	2	2	2	3	3	2	2	2	11	3	3	3	3	3	1	1	1	1	3	3	3	5	3	3	4	4	47	7	4
2	1	4	2	3	2	3	2	1	3	2	9	2	1	1	2	1	2	1	3	1	1	1	1	1	1	1	1	1	0	1	1	1	1	1	1	1	1	1	1	1	1	1	1	1	1	1	17	8	3
1	1	3	2	2	2	4	3	3	3	3	13	1	1	1	1	2	2	2	3	1	1	1	1	1	1	1	1	1	0	2	2	2	2	2	2	2	2	2	2	2	2	2	2	1	1	1	31	8	5
1	1	3	2	2	2	2	2	2	2	2	7	1	1	1	1	1	1	1	0	1	1	1	1	1	1	1	1	1	0	1	1	1	1	1	1	1	1	1	1	1	1	1	1	1	1	1	17	6	4
2	1	3	2	3	2	4	3	2	3	3	13	2	2	2	1	1	2	2	5	2	1	2	2	1	2	1	1	1	4	2	1	2	2	1	1	1	2	1	1	1	2	2	1	1	2	1	24	9	4
2	1	3	2	3	2	3	2	4	2	1	10	2	2	2	2	1	1	2	5	1	1	1	1	1	1	1	1	1	0	2	1	2	2	1	1	1	1	1	1	1	1	1	1	2	1	1	21	6	6
2	1	3	2	2	2	1	1	1	1	1	2	2	1	1	1	1	2	1	2	2	2	2	2	2	1	2	2	1	7	1	1	2	2	2	1	1	1	1	2	2	2	2	2	2	2	2	28	4	3
2	1	3	2	1	3	2	1	1	1	1	3	2	2	2	2	1	2	1	5	1	1	1	1	1	1	1	1	1	0	1	1	1	1	1	1	1	1	1	1	1	1	1	1	1	1	1	17	3	4
1	1	3	2	3	1	3	1	3	1	1	6	2	2	2	1	1	1	1	3	1	1	1	1	1	1	1	1	1	0	1	1	1	1	1	1	1	1	1	1	1	1	1	1	1	1	1	17	5	4
2	1	1	2	1	3	3	2	3	2	2	9	2	2	2	2	1	1	1	4	1	1	1	1	1	1	1	1	1	0	1	1	1	1	1	1	1	2	1	1	1	1	1	1	1	1	1	18	5	6
2	1	3	2	3	3	4	4	2	3	3	15	2	2	2	3	3	4	4	13	4	4	4	4	4	4	4	3	1	23	3	1	2	2	2	2	2	3	1	5	3	4	4	4	4	3	3	48	9	5
2	1	3	2	5	2	2	4	4	4	4	18	1	1	1	1	1	1	1	0	1	1	1	1	1	1	1	1	1	0	1	1	1	1	1	1	1	1	1	1	1	1	1	1	1	1	1	17	13	6
1	1	3	2	4	3	4	3	5	3	3	18	3	2	3	2	2	3	3	11	2	2	3	3	3	2	2	3	1	12	1	1	3	2	1	1	1	1	2	3	1	2	2	2	3	2	2	30	10	8
2	1	3	2	2	1	2	2	2	3	2	7	2	1	1	1	1	1	1	1	1	1	1	1	1	1	1	1	1	0	1	1	1	1	1	1	1	1	1	1	1	1	1	1	1	1	1	17	7	3
1	1	2	2	2	2	3	1	2	2	1	6	1	1	1	1	1	1	1	0	1	1	1	1	1	1	1	1	1	0	1	1	1	1	1	1	1	1	1	1	1	1	1	1	1	1	1	17	5	4
1	1	3	2	1	3	3	1	1	1	1	4	1	1	1	1	1	1	2	1	1	1	1	1	1	1	1	1	1	0	1	1	1	2	1	1	1	1	1	1	1	1	1	1	1	2	1	19	3	4
2	1	3	2	3	2	5	3	2	3	3	14	4	2	3	2	1	2	3	10	2	2	3	2	2	2	1	1	2	8	2	1	3	3	1	2	1	1	2	1	2	2	2	2	1	2	2	30	9	4
2	1	4	2	3	2	3	2	1	2	2	8	2	2	2	2	2	2	2	7	2	2	2	2	2	1	2	2	1	7	1	1	1	1	1	1	1	1	1	1	1	1	1	2	1	1	1	18	7	3
2	1	1	2	3	1	5	5	4	3	1	15	2	1	4	1	1	1	2	5	1	1	1	1	1	1	4	1	1	3	1	1	1	2	1	1	1	1	2	2	1	2	2	1	1	2	2	24	7	5
2	1	3	1	1	1	3	1	1	1	1	2	2	2	1	1	1	1	1	2	1	1	1	1	3	1	1	1	1	2	1	1	1	1	1	1	1	1	1	1	1	1	1	1	1	1	1	17	3	2
2	1	3	2	3	2	5	1	2	5	3	14	2	2	2	2	1	2	2	6	2	2	2	2	1	1	1	1	1	4	2	1	2	2	2	1	1	1	1	1	1	1	2	2	2	2	2	26	11	4
1	1	3	1	5	2	4	3	3	5	2	17	3	3	2	2	1	2	3	9	2	3	2	2	1	2	2	2	1	8	3	1	3	1	3	2	2	1	1	2	2	5	4	2	2	3	2	39	12	5
1	1	3	2	3	1	4	3	4	4	3	15	2	2	3	3	2	3	3	11	4	2	3	3	1	1	2	1	1	9	3	1	2	2	2	1	1	1	1	1	1	1	1	1	1	1	1	22	10	5
2	1	4	2	3	2	3	2	2	2	2	9	2	1	2	2	2	2	2	6	2	2	2	2	2	2	1	1	1	6	1	1	2	1	1	1	1	1	1	3	1	2	3	1	2	1	1	24	7	4
2	1	3	2	5	5	5	3	5	3	3	22	2	2	2	2	2	2	2	7	2	2	2	2	2	2	2	2	2	9	2	2	2	2	2	2	2	2	2	2	2	2	2	2	2	2	2	34	11	10
2	1	3	2	3	3	4	4	5	3	3	18	1	3	3	3	3	3	3	12	3	3	3	3	3	3	1	1	1	12	1	1	2	3	1	1	1	3	1	1	1	3	2	2	1	2	1	27	9	8
2	1	3	2	3	2	3	3	2	3	3	12	3	3	3	3	3	3	3	14	3	2	2	3	3	3	2	2	1	12	2	1	2	2	1	1	1	1	2	2	2	2	2	2	1	1	2	27	9	4
2	1	4	2	1	1	1	1	1	1	1	0	1	1	1	1	1	1	1	0	1	1	1	1	1	1	1	1	1	0	1	1	1	1	1	1	1	1	1	1	1	1	1	1	1	1	1	17	3	2
2	1	4	2	2	1	3	3	2	3	3	10	1	2	2	2	1	2	2	5	2	2	1	2	3	3	2	2	2	10	3	1	2	2	1	2	2	1	2	2	2	2	1	2	2	2	1	30	8	3
1	1	4	2	5	1	3	4	3	4	3	16	2	2	2	1	1	2	2	5	1	1	1	2	1	1	1	1	1	1	2	1	1	2	1	1	1	1	1	1	1	1	1	1	1	1	1	19	12	4
1	1	3	2	1	1	2	1	2	3	2	5	1	1	2	1	1	1	1	1	1	1	2	2	1	1	1	1	1	2	2	1	1	1	2	1	1	1	2	2	1	1	2	2	2	1	1	24	6	3
1	1	3	1	3	2	2	2	3	3	3	11	2	2	2	2	2	2	2	7	2	2	2	2	2	2	2	2	2	9	2	2	2	2	2	2	2	2	2	2	2	2	2	2	2	2	2	34	9	5
1	1	3	2	3	2	1	1	1	3	2	6	2	2	2	2	2	2	2	7	2	2	2	2	1	2	2	2	1	7	2	1	2	2	2	2	2	2	2	2	2	2	2	2	2	2	2	33	8	3
1	1	3	2	3	2	3	2	2	2	2	9	2	1	1	1	1	1	1	1	1	2	1	1	1	1	1	1	1	1	1	1	1	1	1	1	1	1	1	1	1	1	1	1	1	1	1	17	7	4
1	1	3	2	1	1	1	1	1	3	1	2	1	1	1	1	1	1	1	0	1	1	1	1	1	1	1	1	1	0	1	1	1	1	1	1	1	1	1	1	1	3	1	2	1	3	1	22	5	2
1	1	3	2	3	2	3	2	4	3	3	13	2	2	2	2	1	1	2	5	1	1	1	1	1	1	1	1	1	0	1	1	1	1	1	1	1	1	1	1	1	1	1	1	1	1	1	17	9	6
2	1	4	2	4	1	2	3	1	3	3	10	1	1	1	1	1	1	2	1	1	1	1	2	1	1	1	1	1	1	2	1	2	2	1	1	1	1	1	1	1	1	1	1	1	1	1	20	10	2
1	1	4	2	5	5	2	5	3	5	5	23	2	2	2	2	2	2	1	6	3	2	3	3	4	3	3	2	3	17	3	3	3	3	4	3	3	3	3	3	3	3	3	3	3	3	3	52	15	8
2	1	4	2	4	3	4	4	4	5	3	20	1	1	2	1	1	1	1	1	1	1	1	1	1	1	1	1	1	0	3	1	2	2	1	1	1	2	2	2	1	1	1	1	1	1	1	24	12	7
1	1	4	2	1	1	1	1	1	2	1	1	3	3	3	3	2	3	3	13	3	3	3	3	2	3	3	2	3	16	2	1	1	1	1	1	1	1	2	2	3	4	4	4	3	3	4	38	4	2
1	1	3	2	4	5	5	5	4	5	5	26	3	3	3	4	3	4	4	17	3	4	4	3	3	4	4	3	4	23	4	3	3	3	3	4	4	4	5	5	5	5	3	4	5	5	4	69	14	9
2	1	4	2	3	2	4	3	1	1	3	10	2	2	2	2	2	2	2	7	1	2	2	2	1	1	1	1	1	3	1	1	2	1	1	1	1	1	1	1	1	1	2	2	1	2	1	21	7	3
1	1	3	2	1	1	1	1	1	1	1	0	1	1	1	1	1	1	1	0	1	1	1	1	1	1	1	1	1	0	1	1	1	1	1	1	1	1	1	1	1	1	1	1	1	1	1	17	3	2
2	1	4	2	3	2	2	3	2	3	2	10	2	2	1	1	1	1	2	3	1	1	2	2	1	1	1	2	1	3	2	1	2	1	1	1	1	1	1	2	1	1	2	1	2	1	1	22	8	4
1	1	3	2	1	1	2	1	1	2	2	3	2	2	3	2	2	2	3	9	2	3	2	3	2	3	2	1	3	12	2	1	1	2	2	3	2	2	2	2	2	3	2	3	2	3	3	37	5	2
1	1	3	2	1	1	3	1	2	1	1	3	2	2	2	2	2	2	1	6	2	2	1	3	2	1	2	1	1	6	2	1	3	1	2	1	2	1	2	2	3	4	1	3	3	3	1	35	3	3
1	1	4	2	1	2	3	1	2	1	1	4	1	1	1	1	1	1	1	0	2	1	3	1	3	1	2	1	1	6	1	1	1	1	1	1	1	1	1	3	1	1	1	1	2	2	1	21	3	4
1	1	3	2	2	3	5	2	4	2	2	13	2	1	2	2	2	2	3	7	2	3	3	3	1	2	2	2	1	10	3	3	3	3	3	3	3	3	3	3	3	3	3	3	3	3	3	51	6	7
1	1	3	2	1	2	3	1	3	2	2	7	1	1	2	1	1	1	1	1	1	1	1	1	1	1	1	1	1	0	1	1	1	2	1	1	1	2	1	1	1	1	1	1	1	1	1	19	5	5
1	1	3	2	3	2	3	2	2	4	2	11	2	2	2	1	2	2	1	5	1	1	1	1	1	1	1	1	1	0	2	1	1	2	1	1	1	1	1	1	1	2	1	1	1	1	2	21	9	4
1	1	3	2	4	3	4	4	3	4	4	19	2	2	2	2	2	2	2	7	2	2	2	2	2	2	2	2	1	8	1	2	2	3	2	3	3	1	2	3	3	3	4	3	3	3	3	44	12	6
1	1	3	2	3	3	4	3	4	4	3	17	2	1	3	3	2	3	2	9	3	3	3	3	3	3	3	3	3	18	3	3	3	3	3	3	3	3	3	3	3	3	3	3	3	3	3	51	10	7
1	1	4	2	3	1	1	3	2	3	3	9	2	1	2	1	2	2	1	4	2	1	1	2	1	1	1	1	1	2	1	1	1	1	1	1	1	1	1	1	1	1	1	1	1	1	1	17	9	3
2	1	3	2	3	3	4	3	2	3	2	13	2	2	1	1	1	2	2	4	2	2	1	1	1	1	2	2	1	4	1	1	2	1	1	1	1	1	1	1	1	1	1	2	2	2	1	21	8	5
2	1	4	2	3	1	3	3	2	3	3	11	2	2	2	1	1	2	2	5	2	2	2	1	1	1	1	1	1	3	2	1	1	1	1	1	1	1	1	1	1	1	1	1	1	2	2	20	9	3
2	1	2	2	2	2	1	2	3	3	2	8	1	1	1	1	1	1	1	0	1	1	1	1	1	1	1	1	1	0	1	1	2	1	1	1	1	1	1	1	1	1	1	1	1	1	1	18	7	5
1	1	3	2	3	1	3	1	3	3	3	10	3	3	3	3	3	3	3	14	2	2	2	2	2	2	2	2	2	9	3	3	3	3	3	3	3	3	3	3	3	3	3	3	3	3	3	51	9	4
2	1	1	2	2	2	4	3	4	3	3	14	2	1	3	1	2	1	1	4	1	1	1	2	1	1	2	2	1	3	1	1	1	2	2	1	1	1	2	2	1	2	1	1	2	2	2	25	8	6
1	1	4	2	2	2	3	2	2	2	2	8	1	1	1	1	1	1	1	0	2	2	2	2	1	2	2	1	1	6	1	1	1	1	2	1	1	1	1	2	1	3	2	1	2	3	2	26	6	4
2	1	3	2	3	1	3	1	2	2	1	6	1	1	2	2	1	2	2	4	2	2	2	1	1	1	1	2	1	4	1	2	1	2	1	2	1	2	1	2	2	1	3	2	2	3	2	30	6	3
1	1	3	2	1	1	1	1	1	1	1	0	1	1	1	1	1	1	1	0	1	1	1	1	1	1	1	1	1	0	1	1	1	1	1	1	1	1	1	1	1	1	1	1	1	1	1	17	3	2
2	1	3	2	3	3	2	2	2	2	2	9	2	1	1	1	1	2	1	2	1	1	1	1	1	2	1	1	1	1	1	1	1	1	1	1	1	1	1	1	1	2	1	2	1	2	2	21	7	5
2	1	3	2	3	2	3	1	2	2	1	7	1	1	1	1	1	2	1	1	1	1	1	2	1	1	1	1	1	1	1	1	2	1	1	1	1	1	1	1	1	1	1	1	1	2	1	19	6	4
2	1	3	2	3	2	2	3	2	3	2	10	2	2	3	2	2	2	2	8	1	1	1	1	2	1	3	1	1	3	1	1	2	1	2	1	1	1	2	1	1	3	1	1	1	2	2	24	8	4
2	1	3	2	2	2	3	2	3	2	2	9	1	1	1	1	1	1	1	0	1	1	1	1	1	1	1	1	1	0	1	1	1	1	1	1	1	1	1	1	1	1	1	1	1	1	1	17	6	5
1	1	3	2	2	2	3	2	3	2	3	10	2	2	2	3	2	3	1	8	4	3	3	2	2	1	3	1	1	11	2	2	1	2	1	1	1	1	1	2	1	2	3	2	4	3	2	31	7	5
2	1	3	2	4	3	4	4	2	3	3	16	2	2	2	2	1	2	1	5	2	1	2	2	2	1	2	2	1	6	2	1	1	1	1	2	2	2	1	1	1	2	2	2	2	2	2	27	10	5
2	1	3	2	3	2	5	5	4	3	3	18	3	2	3	2	1	2	2	8	2	2	2	2	2	2	2	1	1	7	2	1	2	2	2	1	1	1	1	2	2	2	2	2	1	1	2	27	9	6
2	1	3	2	1	2	2	1	1	2	2	4	2	2	2	2	2	2	2	7	2	2	2	2	2	2	2	1	1	7	2	1	1	1	1	1	1	1	1	1	1	1	1	1	1	1	1	18	5	3
2	1	2	2	2	3	3	2	2	2	2	9	1	1	1	1	1	1	1	0	1	1	1	1	1	1	1	1	1	0	1	1	1	1	1	1	1	1	1	1	1	1	1	1	1	1	1	17	6	5
2	1	3	2	3	3	3	3	3	3	3	14	2	2	1	1	1	1	1	2	1	1	1	1	1	1	1	1	1	0	1	2	1	1	1	1	1	1	1	1	1	1	1	1	1	1	1	18	9	6
2	1	3	2	1	3	2	2	4	2	1	8	2	2	1	1	2	1	1	3	1	1	1	1	1	1	1	1	1	0	1	1	1	1	1	1	1	1	1	1	1	1	1	1	1	1	1	17	4	7
2	1	3	2	3	2	2	3	2	3	3	11	2	2	2	2	1	1	1	4	2	2	4	3	4	1	3	1	1	12	2	2	1	2	2	1	1	1	1	2	1	1	4	1	3	1	2	28	9	4
1	1	3	2	2	1	3	1	1	1	1	3	1	1	1	1	1	1	1	0	1	1	2	2	3	1	1	1	1	4	1	1	1	1	1	1	1	1	1	1	1	1	2	1	1	1	1	18	4	2
1	1	3	2	2	2	2	2	1	2	2	6	1	1	1	1	1	1	1	0	2	2	1	1	1	1	1	1	1	2	2	1	1	1	2	1	1	1	1	2	1	1	1	1	1	2	1	21	6	3
2	1	4	2	4	2	4	2	3	3	2	13	2	1	2	2	1	1	1	3	1	2	2	1	1	1	1	1	1	2	1	1	1	1	2	1	1	1	1	1	1	1	2	1	1	2	1	20	9	5
1	1	4	2	3	2	3	3	1	2	2	9	2	2	2	2	2	2	2	7	1	1	2	1	1	1	1	1	1	1	2	1	1	1	1	1	1	1	1	1	1	1	1	1	1	1	1	18	7	3
1	1	3	2	1	1	3	2	2	2	1	5	1	1	1	1	1	1	1	0	1	1	1	1	1	1	1	1	1	0	1	1	1	1	1	1	1	1	1	1	1	1	1	1	1	1	1	17	4	3
1	1	3	2	1	1	3	1	2	1	1	3	1	1	1	1	1	1	1	0	1	1	1	1	1	1	1	1	1	0	1	1	1	1	1	1	1	1	1	1	1	1	1	1	1	2	1	18	3	3
1	1	3	2	3	2	2	3	2	2	2	9	1	1	1	1	1	1	1	0	1	1	1	1	1	1	1	2	2	2	2	2	2	2	2	2	2	2	2	2	2	2	2	1	1	1	1	30	7	4
1	1	3	2	3	1	3	4	2	4	3	13	2	2	2	2	1	1	2	5	1	1	2	2	1	1	1	1	1	2	2	1	1	3	3	3	3	1	1	1	1	1	2	1	1	3	3	31	10	3
1	1	3	2	3	2	3	3	3	2	4	13	3	2	2	2	2	2	2	8	2	2	3	3	3	3	2	2	2	13	2	3	3	3	3	3	2	2	3	3	3	2	2	3	2	2	2	43	9	5
2	1	4	2	5	2	3	1	1	3	1	9	2	2	1	1	1	1	2	3	1	2	1	1	2	1	1	2	1	3	1	1	3	1	1	2	1	1	1	1	1	2	1	1	1	1	1	21	9	3
2	1	3	2	3	1	1	2	1	2	2	5	2	1	1	1	1	1	1	1	1	1	1	1	1	1	1	1	1	0	1	1	1	2	1	1	1	1	1	2	1	2	1	1	1	1	1	20	7	2
1	1	4	2	1	2	3	1	2	2	1	5	1	1	1	1	1	1	1	0	1	1	1	1	1	1	1	1	1	0	2	1	1	1	1	1	1	1	2	2	1	2	1	2	2	3	1	25	4	4
2	1	4	2	3	2	3	2	1	2	2	8	2	1	1	1	1	2	1	2	1	1	1	2	2	1	2	1	1	3	2	1	1	2	1	2	1	1	1	1	1	1	1	1	1	1	1	20	7	3
1	1	4	2	5	2	4	4	2	3	3	16	2	2	2	2	1	2	2	6	3	2	2	3	2	1	1	1	1	7	2	1	2	2	1	1	1	1	2	2	2	3	1	2	2	2	2	29	11	4
2	1	1	2	1	1	1	1	1	1	1	0	2	2	2	1	1	1	1	3	2	1	1	2	2	1	1	1	1	3	2	1	2	1	1	1	1	1	1	1	1	1	1	1	1	2	1	20	3	2
2	1	3	2	3	1	1	1	1	1	1	2	1	1	1	1	1	1	1	0	1	1	1	1	1	1	1	1	1	0	1	1	1	1	1	1	1	1	1	1	1	1	1	1	1	1	1	17	5	2
2	1	1	2	2	1	3	1	1	3	1	5	2	2	2	2	2	2	2	7	2	2	1	2	1	1	1	1	1	3	1	1	1	1	1	1	1	1	2	1	1	2	2	2	2	2	2	24	6	2
2	1	3	2	3	2	2	2	2	3	2	9	2	2	2	2	1	1	2	5	1	1	2	1	1	1	1	1	1	1	1	1	1	2	1	1	1	2	1	1	1	2	1	1	2	1	1	21	8	4
1	1	1	2	3	1	4	1	5	3	2	12	2	2	4	4	3	3	3	14	3	2	4	4	3	1	2	2	1	13	1	1	2	1	1	1	1	2	1	3	2	2	2	2	2	2	1	27	8	6
2	1	3	2	1	2	3	1	2	2	3	7	1	1	1	1	1	1	1	0	1	1	1	1	1	1	1	1	1	0	2	1	1	1	1	1	1	1	1	2	2	2	1	1	1	2	1	22	6	4
2	1	2	2	1	1	3	1	1	1	1	2	1	1	1	1	1	1	1	0	1	1	1	1	1	1	1	1	1	0	1	1	1	1	1	1	1	1	1	1	1	1	1	1	1	1	1	17	3	2
2	1	3	2	2	2	2	2	2	2	2	7	1	1	1	1	1	1	1	0	1	1	1	1	1	1	1	1	1	0	1	1	1	1	1	1	1	1	1	1	1	1	1	1	1	1	1	17	6	4
2	1	1	2	2	2	4	2	5	2	4	14	2	2	2	1	1	2	2	5	1	1	3	2	3	1	1	1	1	5	2	1	2	2	1	2	1	2	1	3	1	1	1	1	1	2	1	25	8	7
2	1	1	2	1	1	3	2	1	2	1	4	2	1	1	1	1	2	1	2	1	1	1	1	2	1	1	1	1	1	1	1	1	1	1	1	1	2	1	2	1	1	1	1	1	1	1	19	4	2
2	1	1	2	2	2	2	2	2	2	2	7	1	1	1	1	1	1	1	0	3	2	1	1	1	1	1	1	1	3	1	1	2	2	1	1	1	1	1	2	1	1	1	1	1	1	1	20	6	4
1	1	3	2	3	1	3	2	2	2	2	8	2	1	1	1	1	1	1	1	2	1	1	1	1	1	1	1	1	1	2	1	2	1	1	1	1	1	1	1	1	1	1	1	1	1	1	19	7	3
2	1	2	2	3	3	4	3	4	4	3	17	4	2	3	4	2	4	3	15	2	2	2	2	3	3	3	3	3	14	3	3	3	3	3	3	3	3	3	3	3	3	3	3	3	3	3	51	10	7
2	1	1	2	2	2	4	3	4	3	2	13	1	1	1	1	1	1	1	0	1	1	2	1	1	1	1	1	1	1	1	1	2	2	1	2	2	2	1	1	1	1	1	1	1	1	1	22	7	6
2	1	3	2	2	2	3	3	2	2	2	9	2	2	2	2	2	1	2	6	1	1	2	2	1	2	1	1	1	3	1	1	3	2	2	2	3	1	2	3	2	2	1	2	3	3	2	35	6	4
2	1	3	2	2	1	4	2	3	2	2	9	2	1	1	1	1	1	1	1	2	1	2	2	2	2	2	2	1	7	2	2	2	2	1	1	1	1	2	2	2	2	2	3	2	2	2	31	6	4
1	1	3	2	4	2	4	3	3	3	2	14	3	2	3	3	1	2	3	10	3	2	3	2	2	3	3	2	3	14	3	3	2	2	3	2	3	2	3	2	2	3	3	3	4	2	4	46	9	5
1	1	3	2	2	2	3	2	2	2	2	8	2	2	2	1	1	2	1	4	2	1	2	2	2	2	2	2	1	7	2	1	2	1	1	1	1	1	1	1	1	2	2	2	2	1	1	23	6	4
2	1	1	2	1	1	1	1	1	1	1	0	2	2	2	2	1	2	2	6	2	2	2	2	2	2	2	2	1	8	2	2	2	2	2	2	2	1	1	1	1	2	2	2	2	2	2	30	3	2
2	1	3	2	2	1	3	2	2	2	2	7	1	1	2	2	1	1	1	2	2	1	2	2	1	1	1	1	1	3	2	1	1	1	1	1	1	1	1	1	1	1	2	1	1	1	1	19	6	3
1	1	3	2	3	2	4	2	2	3	1	10	2	1	1	1	1	1	1	1	1	1	1	1	1	1	1	1	1	0	1	1	2	2	1	2	1	1	1	2	2	2	1	1	1	1	1	23	7	4
1	1	2	2	4	1	4	2	3	2	2	11	2	2	1	2	2	3	2	7	2	2	1	2	1	1	1	1	1	3	3	1	2	2	1	2	2	1	1	3	1	1	2	2	2	3	2	31	8	4
2	1	3	2	4	1	3	3	1	3	2	10	2	2	2	2	2	2	2	7	2	3	3	3	2	2	2	2	2	12	3	2	3	3	2	2	2	2	2	3	3	3	3	3	2	2	2	42	9	2
2	1	3	2	2	2	3	3	1	3	2	9	2	3	3	2	1	1	1	6	1	2	2	3	3	3	2	1	1	9	1	1	2	2	1	1	1	1	1	1	1	2	2	2	1	2	2	24	7	3
2	1	3	2	3	3	4	3	3	3	3	15	2	1	2	2	2	2	2	6	2	2	2	2	2	2	2	2	2	9	3	3	3	3	3	3	3	3	3	3	3	3	3	3	3	3	3	51	9	6
1	1	2	2	3	3	2	4	3	5	4	17	3	2	2	3	1	1	2	7	2	1	1	1	1	1	2	1	1	2	1	1	2	2	1	1	1	1	2	1	1	1	1	1	1	1	1	20	12	6
2	1	3	2	3	2	1	1	1	1	1	3	1	1	1	1	1	1	1	0	1	1	1	1	1	1	1	1	1	0	1	1	1	1	1	1	1	1	1	1	1	1	1	1	1	1	1	17	5	3
1	1	3	2	1	1	2	1	1	1	1	1	2	1	2	2	1	1	2	4	1	2	1	4	2	1	2	1	1	6	2	1	2	2	1	1	1	1	1	1	1	2	1	1	1	3	1	23	3	2
2	1	3	2	3	1	3	3	2	2	2	9	3	2	2	2	1	2	1	6	3	2	2	2	1	1	1	2	3	8	1	1	2	1	1	1	1	1	3	2	1	3	3	4	2	3	3	33	7	3
2	1	3	2	5	3	5	5	5	4	4	24	3	3	3	3	3	3	3	14	3	3	3	3	2	2	3	2	1	13	1	1	2	2	2	1	1	1	2	1	1	2	2	2	2	1	2	26	13	8
2	1	3	2	2	1	1	1	1	3	2	4	2	1	1	1	1	2	1	2	1	1	2	2	1	1	1	1	1	2	2	1	2	2	1	1	2	1	1	1	1	1	2	1	1	1	1	22	7	2
1	1	3	2	2	3	4	2	2	3	2	11	1	1	1	1	1	1	1	0	1	1	1	1	1	1	1	1	1	0	1	1	2	2	1	1	1	1	1	1	1	1	1	2	1	2	1	21	7	5
1	1	3	2	1	1	3	1	1	1	1	2	2	2	2	1	1	2	2	5	1	2	1	2	1	1	1	1	1	2	2	1	1	2	2	2	1	1	2	3	1	1	1	2	1	2	2	27	3	2
1	1	3	2	1	1	1	1	1	1	1	0	1	1	1	1	1	1	1	0	1	1	1	1	1	1	1	1	1	0	1	1	1	1	1	1	1	1	1	1	1	1	1	1	1	1	1	17	3	2
1	1	3	2	1	2	2	1	1	2	1	3	1	1	1	1	1	1	1	0	2	1	2	1	1	1	3	1	1	4	1	1	1	1	2	1	1	2	1	1	1	1	3	1	2	4	1	25	4	3
2	1	3	2	4	3	4	2	2	3	2	13	2	2	2	2	2	2	2	7	1	1	3	2	1	1	1	1	1	3	1	1	1	2	1	1	1	1	1	1	1	1	1	1	1	1	1	18	9	5
1	1	4	2	3	2	4	3	4	4	4	17	2	1	2	2	2	2	2	6	2	2	2	3	3	2	2	2	1	10	2	1	1	2	2	1	1	1	1	1	1	1	3	3	3	3	1	28	11	6
2	1	3	2	3	2	4	4	4	3	3	16	3	2	2	1	1	2	2	6	2	2	1	2	1	2	3	2	1	7	1	1	2	2	1	1	1	2	1	2	2	3	1	4	3	3	3	33	9	6
1	1	4	2	4	3	3	3	3	3	3	15	2	1	1	1	1	2	1	2	1	2	2	2	2	2	2	2	2	8	2	2	2	2	2	2	2	2	2	2	2	2	2	2	2	2	2	34	10	6
1	1	4	2	2	2	3	3	2	3	3	11	2	2	2	2	2	2	2	7	3	1	3	2	1	1	2	1	1	6	2	1	1	1	1	2	2	1	1	1	1	1	3	2	2	2	1	25	8	4
2	1	3	2	1	1	1	1	1	1	1	0	1	1	1	1	1	1	1	0	1	1	1	1	1	1	1	1	1	0	1	1	1	1	1	1	1	1	1	1	1	1	1	1	1	1	1	17	3	2
2	1	3	2	3	2	3	2	2	3	3	11	2	2	2	1	1	1	2	4	1	1	1	2	1	1	1	2	1	2	1	1	1	2	1	1	1	2	2	1	1	1	1	1	1	2	1	21	9	4
2	1	3	2	2	2	4	2	3	3	3	12	2	2	2	1	1	2	2	5	2	1	2	2	1	1	1	2	1	4	2	1	2	2	1	1	1	1	1	1	1	1	2	1	1	2	1	22	8	5
1	1	3	2	5	2	3	3	2	4	3	15	2	2	1	1	1	1	1	2	1	1	1	1	1	1	1	1	1	0	2	1	2	3	1	2	1	2	1	2	2	2	3	1	2	2	1	30	12	4
2	1	3	2	3	1	1	3	1	3	3	8	2	2	2	2	2	2	2	7	2	2	2	2	1	1	1	1	1	4	1	1	2	2	2	2	2	2	2	2	2	2	2	2	2	2	2	32	9	2
2	1	3	2	3	3	1	3	3	3	3	12	2	2	2	2	2	2	2	7	2	2	2	2	2	1	2	2	1	7	2	2	2	2	2	1	1	1	1	1	1	1	1	1	1	2	1	23	9	6
1	1	3	1	3	2	2	3	4	3	3	13	3	2	2	2	2	2	2	8	4	3	4	4	4	3	4	4	1	22	3	2	2	2	2	2	2	2	2	2	2	5	5	2	5	3	4	47	9	6
2	1	1	2	2	2	2	2	2	2	2	7	1	1	1	1	1	1	1	0	1	1	1	1	1	1	1	1	1	0	1	2	2	2	1	2	2	2	1	1	1	1	1	1	1	1	1	23	6	4
2	1	2	2	1	1	2	1	2	3	1	4	2	1	1	1	1	1	1	1	1	1	3	2	1	1	1	1	1	3	1	1	1	1	1	1	1	1	2	2	1	1	1	1	1	2	1	20	5	3
2	1	2	2	3	2	3	2	4	2	2	11	2	2	3	2	2	2	2	8	3	3	3	3	3	3	3	2	1	15	2	2	3	2	1	2	3	1	2	2	2	3	3	2	3	3	2	38	7	6
1	1	2	2	1	1	1	1	2	2	2	3	1	1	1	1	1	1	1	0	1	1	1	1	1	1	1	1	1	0	1	1	1	1	1	1	1	1	1	1	1	1	1	1	1	1	1	17	5	3
2	1	2	2	4	2	2	2	2	3	2	10	2	1	2	1	1	1	2	3	1	1	1	2	1	1	1	1	1	1	1	1	1	1	1	1	1	1	1	1	1	1	1	1	1	1	1	17	9	4
1	1	2	2	1	1	1	1	1	1	1	0	2	1	1	1	1	1	1	1	1	1	1	1	1	1	1	1	1	0	1	1	1	1	1	1	1	1	1	2	1	1	1	1	1	2	1	19	3	2
2	1	3	2	2	2	4	3	2	2	2	10	2	2	2	1	1	1	1	3	3	1	1	2	1	1	2	1	1	4	1	1	1	2	1	1	1	1	1	1	1	1	1	1	1	1	1	18	6	4
1	1	2	2	3	1	3	2	3	3	3	11	2	2	2	2	1	1	2	5	2	2	2	2	1	1	2	1	1	5	2	1	2	2	2	2	2	2	2	2	1	1	1	2	2	4	3	33	9	4
1	1	1	2	2	3	3	4	4	4	3	16	2	2	2	2	2	2	2	7	2	2	1	2	2	2	1	2	1	6	2	2	2	1	2	2	1	2	2	1	1	1	2	2	2	2	1	28	9	7
2	1	1	2	1	1	4	3	3	4	3	12	4	4	3	4	3	3	4	18	2	2	1	2	1	1	2	2	1	5	1	1	2	2	1	2	2	1	1	1	1	1	1	2	2	1	1	23	8	4
1	1	3	2	2	1	3	1	2	2	2	6	2	2	2	2	2	2	2	7	2	1	1	1	1	2	2	1	1	3	1	1	1	1	1	1	1	1	1	2	1	2	1	2	2	2	2	23	6	3
1	1	3	2	1	1	4	1	3	1	1	5	2	2	2	2	1	1	2	5	1	1	1	1	1	1	1	1	1	0	1	1	1	1	1	1	1	1	2	1	1	1	1	1	1	1	1	18	3	4
1	1	2	2	2	3	2	3	2	2	2	9	1	1	1	1	1	1	1	0	2	1	2	2	1	3	1	1	1	5	2	1	2	1	1	1	1	2	1	1	1	2	1	1	1	1	1	21	6	5
2	1	3	2	2	2	3	2	2	3	2	9	2	1	2	2	1	1	2	4	1	1	1	2	1	1	1	1	1	1	2	1	2	2	2	1	1	1	1	1	1	2	2	1	1	2	1	24	7	4
2	1	3	2	2	2	3	3	2	2	2	9	2	2	2	2	1	2	1	5	2	1	2	2	1	1	1	1	1	3	1	1	1	1	1	1	1	1	1	1	1	1	2	2	1	2	1	20	6	4
2	1	3	2	4	4	4	4	4	4	4	21	1	1	1	1	1	1	1	0	1	1	1	1	1	1	1	1	1	0	3	1	1	1	1	1	1	1	1	1	1	1	1	1	1	1	1	19	12	8
2	1	3	2	5	2	4	3	3	4	3	17	3	2	2	3	1	2	1	7	1	1	1	2	3	1	1	1	1	3	1	1	1	1	1	1	1	1	1	1	1	1	1	1	1	1	1	17	12	5
2	1	3	2	1	2	3	3	3	2	3	10	2	2	1	2	1	1	1	3	1	1	2	1	1	1	2	1	1	2	2	2	2	2	1	1	1	2	1	2	1	2	2	1	1	2	1	26	6	5
1	1	3	2	1	1	3	2	1	1	1	3	1	1	1	1	1	1	1	0	1	1	1	1	1	1	1	1	1	0	1	1	1	1	1	1	1	1	1	1	1	1	1	1	1	1	1	17	3	2
2	1	3	2	1	2	2	2	2	2	2	6	1	1	1	1	1	1	1	0	1	1	1	1	1	1	1	1	1	0	1	1	1	1	1	1	1	1	1	1	1	1	1	1	1	1	1	17	5	4
2	1	1	2	3	2	3	3	3	2	2	11	1	2	2	2	2	2	2	6	1	1	2	1	1	1	2	1	1	2	2	1	2	2	1	1	2	2	2	2	1	1	2	2	1	2	1	27	7	5
2	1	3	2	3	2	3	2	2	3	2	10	2	2	1	1	2	2	2	5	2	1	1	1	2	1	2	2	1	4	2	1	1	2	1	2	2	1	1	2	1	1	1	1	1	2	1	23	8	4
2	1	3	2	2	2	2	2	2	2	2	7	1	1	1	1	1	1	1	0	1	1	1	1	1	1	1	1	1	0	1	1	1	1	1	1	1	1	1	1	1	1	1	1	1	1	1	17	6	4
2	1	3	2	1	2	2	2	2	2	1	5	1	1	1	1	1	1	1	0	1	1	1	1	1	1	1	1	1	0	1	1	1	1	1	1	1	1	1	1	1	1	1	1	1	1	1	17	4	4
2	1	3	2	2	1	3	2	2	3	2	8	2	1	2	1	1	1	2	3	1	2	1	1	1	1	1	1	1	1	2	1	2	1	1	2	2	2	1	1	1	2	1	1	1	1	1	23	7	3
2	1	4	2	3	2	2	2	2	2	2	8	2	2	2	1	1	2	1	4	1	1	1	2	2	1	1	1	1	2	2	1	1	1	1	1	1	1	1	1	1	2	1	2	1	1	2	21	7	4
2	1	3	2	2	3	3	3	2	3	3	12	4	3	4	4	4	4	4	20	3	3	2	3	3	3	3	2	1	14	3	3	4	4	3	3	3	3	2	3	4	4	4	4	4	5	5	61	8	5
2	1	3	2	2	1	3	2	2	3	2	8	2	1	1	2	1	2	1	3	1	2	1	2	1	1	1	2	1	3	1	1	2	1	1	1	1	1	1	1	1	1	1	2	1	2	1	20	7	3
1	1	3	2	3	1	2	2	2	3	2	8	1	1	1	1	1	1	1	0	1	1	1	1	1	1	1	1	1	0	1	1	1	1	1	1	1	1	1	1	1	2	1	1	1	2	1	19	8	3
2	1	4	2	2	2	2	2	2	2	2	7	1	1	1	1	1	1	1	0	1	1	1	1	1	1	1	1	1	0	1	1	1	1	1	1	1	1	1	1	1	1	1	1	1	1	1	17	6	4
2	1	4	2	3	2	4	3	3	3	3	14	2	2	2	1	1	1	2	4	2	2	2	2	1	1	1	1	1	4	1	1	1	1	1	1	1	1	1	1	1	2	1	1	1	1	1	18	9	5
1	1	3	2	2	1	1	1	1	1	1	1	1	1	1	1	1	1	1	0	1	1	1	1	1	1	1	1	1	0	1	1	1	1	1	1	1	1	1	2	1	1	1	1	1	1	1	18	4	2
2	1	3	2	2	1	3	1	1	3	2	6	1	1	1	1	1	2	1	1	1	2	1	1	1	1	2	1	1	2	1	1	1	2	1	1	1	2	1	1	1	1	1	1	2	2	1	21	7	2
2	1	3	2	3	1	3	2	2	2	2	8	2	2	2	2	2	2	2	7	3	2	1	1	1	1	2	2	1	5	2	1	2	2	1	1	1	1	1	1	1	2	2	2	2	2	1	25	7	3
1	1	1	2	2	1	3	1	2	2	2	6	2	1	1	1	1	2	1	2	2	1	1	2	1	1	1	1	1	2	1	1	2	2	1	1	1	1	2	2	2	1	2	1	2	2	1	25	6	3
2	1	3	2	1	2	2	2	3	2	2	7	2	1	2	2	2	2	1	5	2	3	1	2	4	1	1	1	1	7	1	1	1	1	1	1	1	1	2	2	2	1	1	2	1	1	1	21	5	5
1	1	2	2	4	2	3	2	2	2	2	10	1	1	1	1	1	1	2	1	1	1	1	1	1	1	1	1	1	0	1	1	1	1	1	1	1	1	1	2	1	1	1	2	1	2	1	20	8	4
2	1	3	2	3	3	2	2	4	3	2	12	2	2	3	2	2	2	2	8	2	2	3	2	1	1	1	1	1	5	1	1	1	1	1	1	1	2	1	4	1	1	2	2	2	1	2	25	8	7
2	1	3	2	2	2	3	2	3	3	2	10	2	1	2	1	1	1	2	3	1	2	1	3	2	1	1	1	1	4	1	1	1	1	1	1	1	1	1	1	1	1	2	1	1	1	1	18	7	5
1	1	1	2	4	2	1	1	4	4	4	13	3	3	3	3	3	3	3	14	3	3	3	3	3	3	3	3	3	18	2	2	2	2	1	1	1	1	1	1	1	1	1	1	1	1	1	21	12	6
2	1	3	2	2	1	2	1	1	2	1	3	2	1	1	1	1	1	2	2	1	1	1	1	1	1	1	1	1	0	2	1	1	1	1	1	1	1	1	1	1	1	1	1	1	2	1	19	5	2
1	1	3	2	4	2	4	3	2	3	2	13	3	2	2	2	1	2	2	7	2	2	1	1	2	1	2	2	1	5	1	1	2	2	1	1	1	1	1	1	1	2	1	2	1	2	1	22	9	4
1	1	3	2	2	3	1	1	2	2	1	5	2	2	2	2	1	2	1	5	2	2	2	2	1	2	1	1	1	5	2	1	1	1	1	1	1	1	1	1	1	1	1	1	1	1	1	18	5	5
1	1	3	2	4	2	2	4	1	2	1	9	1	1	1	1	1	1	1	0	2	1	2	2	1	1	1	2	1	4	1	1	2	2	1	1	1	2	1	3	2	1	2	1	1	3	1	26	7	3
2	1	3	2	4	3	4	3	3	3	3	16	2	2	3	2	2	2	2	8	2	2	2	2	3	2	2	1	1	8	2	1	2	2	2	2	2	2	2	1	2	2	2	2	2	2	2	32	10	6
2	1	3	2	2	3	5	3	3	2	1	12	2	2	2	1	1	2	3	6	3	2	3	2	1	1	2	1	1	7	2	2	2	2	1	2	2	1	1	3	1	1	2	2	2	4	2	32	5	6
2	1	3	2	2	3	3	2	4	2	3	12	2	2	2	2	2	2	2	7	3	3	3	3	2	3	3	3	2	16	3	3	3	3	2	3	2	2	2	2	2	2	3	2	3	3	2	42	7	7
1	1	4	2	3	3	4	3	3	3	3	15	2	1	1	2	1	2	2	4	2	1	1	2	2	1	1	1	1	3	2	1	2	2	1	1	1	1	1	2	2	3	1	1	2	1	1	25	9	6
1	1	4	2	4	3	2	4	4	3	4	17	3	2	2	2	1	3	2	8	2	2	2	2	1	1	1	2	1	5	1	1	1	1	1	1	1	1	1	1	1	2	1	2	2	2	1	21	11	7
1	1	4	2	4	2	4	4	3	3	3	16	1	1	1	1	1	2	1	1	1	1	1	1	1	1	1	1	1	0	1	1	1	1	1	1	1	1	1	1	1	1	1	1	2	1	1	18	10	5
2	1	4	2	3	1	5	2	2	2	1	9	2	1	1	2	1	2	1	3	2	1	1	2	1	1	1	1	1	2	1	1	1	1	1	1	1	1	1	1	1	2	1	1	1	1	1	18	6	3
2	1	3	2	4	1	3	4	2	3	2	12	2	2	2	2	2	2	2	7	2	2	2	2	2	2	2	2	2	9	4	2	4	2	2	2	2	2	2	2	2	2	2	2	2	2	2	38	9	3
2	1	3	2	3	2	4	3	3	3	1	12	2	2	2	2	2	2	2	7	2	2	2	1	1	1	1	1	1	3	2	1	1	1	1	1	1	1	2	3	1	1	2	1	1	1	1	22	7	5
2	1	4	2	3	1	4	1	3	3	1	9	2	2	2	2	2	2	2	7	2	2	2	2	1	1	1	1	1	4	1	1	1	2	1	1	1	1	1	1	1	2	2	2	1	1	1	21	7	4
2	1	3	2	5	5	5	5	5	5	5	28	4	4	4	4	4	4	4	21	4	4	4	4	4	4	4	4	1	24	2	2	3	2	2	2	2	2	3	1	2	2	3	3	5	3	4	43	15	10
2	1	3	2	3	3	2	3	4	3	3	14	2	2	1	2	2	2	2	6	2	2	2	2	2	2	2	2	1	8	2	1	2	2	2	2	2	2	2	2	1	1	1	1	2	3	3	31	9	7
1	1	4	2	2	1	3	2	2	3	2	8	1	1	1	1	1	2	1	1	1	2	1	2	1	1	1	1	1	2	1	1	1	2	1	1	1	1	1	3	1	1	1	2	1	1	1	21	7	3
1	1	3	2	1	1	1	1	1	1	1	0	1	1	1	1	1	1	1	0	1	1	1	2	1	1	1	1	1	1	1	1	2	2	1	1	1	2	1	2	1	1	1	2	1	2	1	23	3	2
2	1	3	2	4	3	3	4	3	4	4	18	3	2	2	2	2	2	1	7	1	1	1	1	2	1	1	1	1	1	2	2	2	2	2	3	3	1	1	2	1	2	1	2	1	2	1	30	12	6
2	1	3	2	2	2	2	2	2	3	2	8	1	1	1	1	1	1	1	0	1	1	3	2	2	2	2	1	1	6	1	1	1	1	1	1	1	1	1	1	1	1	1	1	2	2	1	19	7	4
1	1	3	2	2	1	3	2	2	3	2	8	2	1	1	1	1	1	1	1	1	1	1	2	1	1	1	1	1	1	1	1	1	1	1	1	1	2	1	2	2	2	1	1	1	1	1	21	7	3
1	1	2	2	2	3	1	2	3	2	1	7	1	2	1	1	1	1	1	1	1	1	1	1	1	1	1	1	1	0	1	1	1	1	1	1	1	2	1	1	1	1	1	1	1	2	1	19	5	6
2	1	3	2	2	1	2	1	2	2	1	4	2	1	1	1	1	2	1	2	1	1	1	1	1	1	1	1	1	0	1	1	1	2	1	1	1	1	1	1	1	2	1	1	1	1	1	19	5	3
2	1	4	2	4	3	4	4	5	4	2	19	2	1	1	2	1	1	1	2	1	1	1	1	1	1	1	1	1	0	1	1	1	2	1	1	1	1	1	1	1	2	1	1	1	2	1	20	10	8
2	1	4	2	2	2	3	2	2	3	2	9	2	1	1	1	1	1	1	1	1	1	1	1	1	1	1	1	1	0	2	1	1	2	1	3	3	1	1	1	1	2	1	1	1	1	1	24	7	4
1	1	3	2	2	2	2	2	2	3	2	8	2	1	1	1	1	1	2	2	1	1	3	3	4	1	1	1	1	7	1	1	2	1	1	1	1	1	1	1	1	1	1	1	2	1	1	19	7	4
1	1	4	2	5	3	3	2	2	3	2	13	2	1	2	2	1	1	1	3	2	2	1	2	2	2	2	2	1	7	2	1	2	2	1	3	3	3	1	1	1	1	2	2	3	4	2	34	10	5
1	1	4	2	3	3	3	2	3	3	2	12	2	2	2	3	2	2	2	8	2	2	1	2	1	1	1	1	2	4	2	1	2	2	2	1	1	1	1	1	1	1	1	2	2	2	1	24	8	6
2	1	4	2	2	1	2	1	1	1	1	2	1	1	1	1	1	1	1	0	2	1	1	2	1	1	1	1	1	2	1	1	1	1	1	1	1	1	1	1	1	1	1	2	1	1	1	18	4	2
2	1	3	2	5	4	5	5	5	5	4	26	4	4	4	4	4	4	4	21	3	4	3	4	3	3	2	2	1	16	2	2	2	2	2	2	3	2	4	2	4	4	3	4	4	3	3	48	14	9
1	1	3	2	3	2	5	4	2	4	3	16	1	1	1	1	2	1	1	1	1	2	1	1	1	1	1	1	1	1	1	1	1	1	1	1	1	1	1	1	1	1	1	1	1	1	1	17	10	4
2	1	3	2	5	5	5	5	2	3	3	21	4	4	3	3	3	3	4	17	3	3	4	3	3	4	3	2	1	17	2	2	3	4	4	2	2	2	1	1	1	3	5	2	2	5	5	46	11	7
2	1	3	2	1	2	1	1	1	1	1	1	2	1	1	1	1	1	1	1	1	1	1	1	1	1	1	1	1	0	1	1	1	1	1	1	1	1	1	1	1	1	1	1	1	1	1	17	3	3
1	1	3	2	3	1	2	3	4	3	3	12	2	1	1	1	1	1	2	2	2	2	1	1	2	1	1	1	1	3	1	1	2	2	1	2	2	3	1	2	1	2	1	1	1	2	1	26	9	5
2	1	3	2	1	1	1	1	1	1	1	0	1	1	1	1	1	1	1	0	1	1	1	1	1	1	1	1	1	0	2	1	1	1	1	1	1	1	1	2	1	1	1	1	1	2	2	21	3	2
2	1	3	2	1	1	1	1	1	1	1	0	1	1	1	1	1	1	1	0	1	1	1	1	1	1	1	1	1	0	1	1	1	1	1	1	1	1	1	1	1	1	1	1	1	1	1	17	3	2
2	1	3	2	1	1	3	1	1	3	2	5	1	1	1	1	1	1	1	0	1	1	1	1	1	1	1	1	1	0	1	1	1	1	1	1	1	1	1	1	1	1	3	1	1	3	1	21	6	2
2	1	3	2	1	1	1	1	1	1	1	0	1	1	1	1	1	1	1	0	1	1	1	1	1	1	1	1	1	0	1	1	1	1	1	1	1	1	1	1	1	1	1	1	1	1	1	17	3	2
2	1	3	2	1	1	1	1	1	1	1	0	1	1	1	1	1	1	1	0	1	1	1	1	1	1	1	1	1	0	1	1	2	1	1	1	1	3	1	1	1	1	2	1	1	3	1	23	3	2
2	1	3	2	2	1	2	1	2	1	1	3	1	1	1	1	1	1	1	0	1	1	1	1	1	1	1	1	1	0	1	1	2	1	1	1	1	1	1	1	1	2	1	1	1	1	1	19	4	3
2	1	3	2	4	3	2	2	2	3	2	11	1	1	1	1	1	1	1	0	1	1	1	1	1	1	1	1	1	0	1	1	1	2	1	2	1	2	2	1	1	1	1	1	1	2	1	22	9	5
2	1	4	2	3	2	3	3	2	3	2	11	2	2	2	2	1	2	2	6	1	2	2	2	1	1	1	2	1	4	2	1	1	2	1	1	1	1	1	1	1	2	2	2	1	2	2	24	8	4
2	1	2	2	3	2	3	3	2	2	1	9	2	1	1	1	1	1	2	2	1	1	2	1	1	1	1	1	1	1	1	1	1	1	1	1	1	2	1	2	1	2	3	2	2	2	2	26	6	4
1	1	3	2	2	2	3	2	2	3	2	9	1	1	1	1	1	1	1	0	1	1	1	1	1	1	1	1	1	0	2	1	1	2	1	1	1	1	1	1	1	1	1	1	1	1	1	19	7	4
2	1	3	2	5	3	5	4	4	3	3	20	2	1	2	2	1	2	2	5	2	1	1	1	1	1	1	1	1	1	1	1	1	2	1	1	1	1	1	1	1	1	1	1	1	1	1	18	11	7
1	1	3	2	3	2	3	2	3	3	3	12	3	3	3	2	3	2	3	12	2	3	2	3	2	3	2	3	3	14	2	1	2	2	2	2	3	2	2	3	2	2	3	2	2	3	2	37	9	5
2	1	3	2	5	4	4	5	4	4	5	24	1	2	2	3	2	2	3	8	2	2	2	2	2	2	2	2	2	9	3	3	3	3	3	3	3	3	3	3	3	3	3	3	3	3	3	51	14	8
2	1	3	2	2	2	3	2	2	3	2	9	2	2	2	2	2	2	2	7	2	2	2	2	1	2	1	2	1	6	1	2	1	2	1	1	1	2	2	2	1	1	3	3	2	1	2	28	7	4
2	1	3	2	1	1	3	1	1	1	1	2	2	2	2	2	2	2	1	6	2	1	2	2	2	1	2	2	1	6	2	1	2	2	1	1	1	2	1	2	1	2	2	1	2	2	1	26	3	2
2	1	4	2	3	2	4	3	5	3	2	15	1	1	1	1	1	1	1	0	1	2	1	1	1	2	1	1	1	2	1	1	1	1	1	1	1	1	1	1	1	1	1	1	1	1	1	17	8	7
2	1	3	2	4	3	5	3	5	5	4	22	2	2	2	2	1	3	3	8	2	2	3	2	1	1	1	2	1	6	2	2	2	2	1	1	1	1	1	1	1	3	3	3	2	2	2	30	13	8
1	1	3	2	1	1	1	1	1	1	1	0	1	1	1	1	1	1	1	0	1	1	1	1	1	1	1	1	1	0	1	1	2	1	1	1	1	1	1	1	1	1	1	1	2	1	1	19	3	2
2	1	3	1	1	1	3	2	2	3	2	7	1	1	2	1	1	2	1	2	2	1	2	1	1	1	2	1	1	3	1	1	1	1	2	1	1	2	1	1	1	1	2	1	1	1	1	20	6	3
2	1	1	1	2	2	3	3	5	3	2	13	2	2	2	2	1	2	2	6	2	2	2	2	1	2	2	2	1	7	1	1	2	1	2	2	2	1	2	2	1	2	2	2	2	2	2	29	7	7
2	1	3	2	3	1	3	3	3	3	2	11	2	1	1	1	1	1	2	2	2	2	2	2	2	1	1	1	1	5	1	1	2	2	2	2	2	2	1	1	1	2	2	2	2	2	2	29	8	4
2	1	3	2	1	1	1	1	1	1	1	0	2	1	1	1	1	1	1	1	1	1	2	1	1	1	1	1	1	1	2	1	1	1	1	1	1	1	1	2	1	1	2	1	1	2	1	21	3	2
2	1	3	2	3	2	4	4	3	3	3	15	1	2	2	2	1	2	1	4	2	1	2	2	1	1	1	1	1	3	2	1	2	2	1	1	1	1	1	1	1	1	1	1	2	1	1	21	9	5
2	1	2	2	3	3	2	1	3	3	1	9	2	1	1	1	1	1	1	1	1	1	2	2	1	1	1	1	1	2	2	1	2	2	1	1	1	3	1	1	1	1	2	1	3	2	1	26	7	6
1	1	2	2	1	1	1	1	1	1	1	0	1	1	1	1	1	1	1	0	1	1	1	1	1	1	1	1	1	0	1	1	1	1	1	1	1	1	1	1	1	1	1	1	1	1	1	17	3	2
2	1	3	2	2	2	3	2	3	3	2	10	1	2	2	2	1	1	1	3	1	2	1	2	1	1	1	1	1	2	1	1	1	1	1	1	1	1	1	1	1	1	1	2	1	1	1	18	7	5
1	1	3	2	2	5	3	3	4	4	4	18	3	1	1	2	2	3	1	6	3	3	4	4	3	3	4	3	1	19	2	1	1	1	2	2	2	2	2	2	2	2	2	3	3	3	3	35	10	9
2	1	3	2	3	2	3	3	3	3	3	13	2	2	2	3	2	2	1	7	2	2	2	2	2	1	2	2	1	7	1	1	2	2	2	1	1	1	2	2	2	2	2	2	2	2	2	29	9	5
2	1	3	2	2	1	2	2	2	3	2	7	1	2	1	1	1	1	1	1	1	1	2	1	1	1	1	1	1	1	1	1	1	2	1	2	2	1	1	2	1	1	2	1	1	2	1	23	7	3
1	1	4	2	2	3	3	2	3	1	1	8	2	1	2	1	1	1	2	3	1	1	1	1	1	1	1	1	1	0	2	1	2	2	1	1	1	1	1	2	2	2	1	1	1	2	1	24	4	6
2	1	1	2	1	3	4	4	3	3	2	13	2	1	2	2	2	2	1	5	2	2	2	2	2	1	2	1	1	6	2	1	2	2	1	1	1	1	2	1	1	1	2	1	1	2	1	23	6	6
2	1	3	2	3	3	4	5	5	5	5	23	3	3	3	3	3	3	3	14	2	3	3	3	4	1	1	2	1	11	3	2	3	4	4	4	4	5	3	5	2	4	5	4	4	2	4	62	13	8
2	1	4	2	3	2	3	2	2	3	2	10	2	2	2	3	1	2	2	7	2	2	1	2	2	1	2	1	1	5	2	1	1	2	1	1	1	2	2	2	2	2	1	2	2	2	1	27	8	4
2	1	4	2	2	1	3	1	1	3	1	5	1	1	1	1	1	1	1	0	1	1	1	1	1	1	1	1	1	0	1	1	1	1	1	1	1	1	1	1	1	1	1	1	1	1	1	17	6	2
1	1	4	2	3	3	4	2	2	3	2	12	1	1	1	1	1	1	1	0	2	2	3	2	2	1	1	1	1	6	1	1	1	1	1	1	1	1	1	1	1	1	2	1	2	1	1	19	8	5
2	1	4	2	2	2	3	2	2	3	2	9	2	2	2	2	1	2	2	6	3	2	2	2	1	2	2	1	2	8	2	1	2	1	1	1	1	1	1	1	1	2	2	2	2	1	1	23	7	4
2	1	3	2	2	1	1	1	2	1	1	2	2	2	1	1	1	1	2	3	1	1	1	1	1	1	1	1	1	0	2	1	1	2	1	1	1	1	1	1	1	1	1	1	1	1	1	19	4	3
1	1	3	2	3	2	3	3	3	3	2	12	1	1	2	2	1	1	1	2	1	1	1	1	1	1	1	1	1	0	2	1	1	2	1	1	2	1	2	2	2	1	2	2	2	3	2	29	8	5
2	1	3	2	2	3	3	2	2	2	2	9	1	1	1	1	1	1	1	0	1	1	1	1	1	1	1	1	1	0	2	1	2	2	1	1	2	1	1	2	1	1	1	1	1	2	1	23	6	5
2	1	3	2	3	2	3	3	3	4	3	14	2	3	2	2	2	2	2	8	2	2	3	2	1	1	2	1	1	6	1	1	1	2	2	1	1	1	2	1	1	2	4	1	2	2	1	26	10	5
2	1	3	2	3	2	3	2	2	2	2	9	2	2	2	2	1	2	1	5	2	1	1	1	1	1	1	1	1	1	1	1	1	1	1	1	1	1	1	1	2	2	1	2	1	2	1	21	7	4
2	1	3	2	3	2	4	3	3	4	2	14	3	3	2	3	3	3	2	12	2	1	1	2	2	1	2	2	1	5	2	1	1	2	2	2	2	1	1	1	1	2	1	2	2	2	2	27	9	5
2	1	3	2	1	2	2	1	1	1	1	2	1	1	1	1	1	1	1	0	1	1	1	1	1	1	1	1	1	0	1	1	1	1	1	1	1	1	1	1	1	1	1	1	1	2	1	18	3	3
1	1	4	2	1	2	5	2	1	3	1	8	1	1	1	1	1	1	1	0	1	2	2	1	1	2	2	1	1	4	2	1	2	1	1	1	1	1	1	2	1	1	2	1	1	1	1	21	5	3
2	1	4	2	2	2	2	2	2	2	2	7	1	1	1	1	1	1	1	0	1	1	1	1	1	1	1	1	1	0	1	1	1	1	1	1	1	1	1	1	1	1	1	1	1	1	1	17	6	4
2	1	3	2	2	3	4	2	3	3	3	13	2	1	2	1	1	1	2	3	1	2	1	1	1	2	2	1	1	3	2	1	1	2	2	1	1	1	2	3	2	1	1	2	2	2	2	28	8	6
2	1	3	2	1	1	3	3	3	3	2	9	1	1	2	1	1	2	2	3	1	2	2	2	1	1	1	1	1	3	2	1	1	1	1	1	1	1	1	2	1	1	1	1	1	1	1	19	6	4
2	1	3	2	4	2	2	1	4	3	1	10	2	2	2	2	1	2	2	6	3	2	2	2	2	2	1	1	1	7	2	1	2	2	2	1	2	1	1	2	1	2	3	2	2	2	1	29	8	6
2	1	3	2	4	3	4	3	3	3	3	16	2	3	2	2	2	2	3	9	2	2	2	2	2	2	2	2	2	9	2	2	2	2	2	2	2	2	2	2	2	2	2	2	2	2	2	34	10	6
2	1	2	2	1	1	4	3	2	3	1	8	2	2	3	2	1	2	2	7	3	3	4	4	1	1	3	2	1	13	2	1	4	2	2	1	1	1	2	2	1	2	5	2	2	1	1	32	5	3
2	1	1	2	3	3	3	3	3	3	3	14	2	2	2	2	2	2	2	7	2	2	2	2	2	2	2	2	2	9	2	2	2	2	2	2	2	2	2	2	2	2	2	2	2	2	2	34	9	6
2	1	3	2	3	2	2	2	3	3	2	10	2	1	1	1	1	1	1	1	2	1	2	2	1	1	1	1	1	3	2	1	1	1	1	2	2	2	2	1	1	2	2	2	2	2	1	27	8	5
1	1	3	2	1	1	4	1	1	1	1	3	1	1	1	1	1	1	1	0	1	1	1	1	1	1	1	1	1	0	2	1	4	2	1	1	1	1	1	2	1	2	1	1	1	1	1	24	3	2
2	1	3	2	3	2	2	2	2	3	3	10	1	1	1	1	1	1	1	0	2	2	2	2	1	1	1	1	1	4	2	1	1	2	1	1	1	1	1	1	1	1	2	1	1	1	1	20	9	4
2	1	2	2	2	1	3	2	3	3	2	9	2	1	2	2	1	2	2	5	1	1	1	1	1	1	1	1	1	0	1	1	2	2	1	1	1	1	1	1	1	1	1	1	1	2	1	20	7	4
1	1	3	2	2	3	3	1	1	1	1	5	1	1	1	1	1	1	1	0	1	1	1	1	1	1	1	1	1	0	1	1	1	1	1	1	1	1	1	1	1	1	2	1	1	2	1	19	4	4
2	1	1	2	1	1	4	3	1	3	2	8	1	2	1	1	1	1	1	1	1	1	2	2	1	1	1	1	1	2	2	1	1	2	1	1	1	2	1	1	1	2	3	1	1	2	1	24	6	2
2	2	3	2	4	3	3	3	4	4	3	17	2	2	3	2	2	2	2	8	2	2	2	2	3	2	2	2	1	9	2	1	2	2	2	1	1	2	2	2	2	2	2	2	2	2	2	31	11	7
1	2	3	2	3	2	5	4	2	3	2	14	3	2	2	3	2	2	3	10	3	3	2	3	2	1	2	2	1	10	2	2	2	2	2	2	2	1	2	2	1	1	1	1	1	3	3	30	8	4
2	2	3	2	3	3	4	3	5	3	3	17	3	2	2	2	1	2	1	6	2	2	3	2	1	1	2	1	1	6	2	2	1	2	1	2	1	2	1	2	1	1	3	2	2	2	1	28	9	8
1	2	3	2	2	1	3	1	2	2	2	6	2	1	1	1	1	1	1	1	1	1	1	3	1	1	1	1	1	2	1	1	1	1	1	1	1	1	1	1	1	1	1	1	1	1	1	17	6	3
2	2	2	2	1	1	3	1	2	3	1	5	1	1	1	1	1	1	1	0	1	1	1	1	1	1	1	1	1	0	1	1	2	1	1	1	1	1	1	1	1	1	1	1	1	1	1	18	5	3
2	2	3	2	1	1	3	3	2	2	2	7	2	2	2	2	2	1	2	6	1	2	1	1	1	1	1	1	1	1	1	1	1	1	1	1	1	1	1	1	1	1	1	1	1	3	1	19	5	3
2	2	3	2	2	3	3	2	5	3	2	13	1	1	1	1	1	1	1	0	1	1	1	1	1	1	1	1	1	0	1	1	1	1	1	1	1	1	1	1	1	5	1	1	1	1	1	21	7	8
1	2	3	2	2	3	5	3	2	3	2	13	3	3	3	3	2	3	3	13	3	3	3	3	3	3	3	3	1	16	2	2	3	4	2	3	3	1	2	2	3	3	3	4	4	4	4	49	7	5
2	2	3	2	2	2	4	3	4	3	3	14	2	2	2	2	1	1	2	5	1	1	1	1	1	1	1	1	1	0	2	1	2	2	1	2	2	1	1	1	1	2	1	1	1	2	1	24	8	6
1	2	3	2	3	3	3	2	2	2	3	11	1	1	1	1	1	1	1	0	1	1	2	2	2	1	1	1	1	3	1	1	2	2	1	1	1	1	1	1	1	1	2	1	1	2	1	21	8	5
2	2	3	2	4	3	2	3	2	4	3	14	2	2	2	2	2	2	2	7	2	2	3	2	2	2	3	3	2	12	2	2	2	2	2	2	2	3	2	2	2	3	2	2	2	2	2	36	11	5
2	2	3	2	2	2	3	2	2	2	2	8	1	1	1	1	1	1	1	0	1	1	1	2	1	1	1	1	1	1	1	1	2	1	1	1	1	1	1	1	1	2	1	1	1	1	1	19	6	4
2	2	3	2	3	3	2	2	3	3	3	12	3	3	3	3	3	2	2	12	3	3	3	3	3	3	3	3	3	18	2	2	2	2	2	2	2	2	2	2	2	2	3	2	2	2	2	35	9	6
1	2	4	2	5	2	3	2	4	3	3	15	1	1	1	1	1	1	1	0	1	1	1	1	1	1	1	1	1	0	2	1	1	1	1	1	1	1	1	1	1	1	1	1	1	1	1	18	11	6
1	2	4	2	3	2	4	2	4	3	1	12	2	2	2	2	1	1	2	5	1	2	1	1	1	1	1	1	1	1	1	1	2	2	1	1	1	1	1	1	1	2	1	1	1	1	1	20	7	6
2	2	4	2	4	2	4	4	4	4	3	18	2	1	1	1	1	1	1	1	2	2	1	1	1	1	1	1	1	2	1	1	1	1	2	2	2	1	1	1	1	1	1	1	1	1	1	20	11	6
1	2	3	2	1	1	1	1	2	1	1	1	1	1	1	1	1	1	1	0	1	1	1	1	1	1	1	1	1	0	1	1	1	1	1	1	1	1	1	2	1	1	1	1	1	2	1	19	3	3
2	2	1	2	3	3	4	4	4	4	3	18	2	2	1	1	1	1	2	3	2	2	1	1	1	1	1	1	1	2	2	1	2	2	1	1	2	1	1	1	1	1	2	1	1	3	2	25	10	7
1	2	2	2	1	2	5	1	5	5	1	13	4	2	2	2	2	2	2	9	1	1	1	1	1	1	1	1	1	0	1	1	1	1	1	1	1	1	1	1	1	1	1	1	1	1	1	17	7	7
1	2	1	2	2	1	3	3	2	3	2	9	1	1	1	1	1	1	1	0	1	1	1	1	2	1	1	1	1	1	1	1	2	2	1	1	1	1	1	1	1	1	1	1	1	2	1	20	7	3
2	2	3	2	1	1	1	1	1	1	1	0	1	1	1	1	1	1	1	0	1	1	1	1	1	1	1	1	1	0	1	1	1	1	1	1	1	1	1	1	1	1	1	1	1	1	1	17	3	2
2	2	1	1	1	2	5	3	5	3	3	15	2	1	4	1	1	1	2	5	3	1	3	1	1	1	1	1	1	4	2	2	2	2	1	2	1	2	2	2	1	2	2	1	2	1	1	28	7	7
2	2	1	2	1	2	3	2	3	3	2	9	1	1	1	1	1	1	1	0	1	1	1	1	1	1	1	1	1	0	2	1	2	2	2	2	2	1	2	2	1	1	2	1	1	1	1	26	6	5
2	2	3	2	2	1	2	2	2	1	1	4	1	1	1	1	1	1	1	0	1	1	1	1	1	1	1	1	1	0	1	1	1	2	1	1	1	1	1	1	1	1	1	1	1	1	1	18	4	3
1	2	2	2	3	2	4	3	3	3	3	14	1	1	2	1	2	2	4	6	2	1	1	1	1	1	1	1	1	1	2	1	1	1	1	1	1	1	1	1	1	1	1	1	1	1	1	18	9	5
1	2	3	1	3	3	4	3	4	3	3	16	2	2	2	2	1	2	2	6	1	1	2	2	2	2	1	2	1	5	2	1	2	2	2	1	2	1	2	2	1	1	2	2	2	3	3	31	9	7
2	2	3	1	2	2	3	2	3	3	3	11	2	2	1	2	1	2	2	5	2	1	2	2	1	1	1	1	1	3	2	2	2	2	2	2	2	2	2	2	1	1	2	1	1	3	2	31	8	5
2	2	3	2	2	1	4	1	1	1	1	4	1	1	1	1	1	1	1	0	1	1	2	1	1	1	1	1	1	1	1	1	2	1	1	1	1	1	1	1	1	2	2	1	1	2	1	21	4	2
2	2	1	2	2	2	4	3	1	3	3	11	1	1	2	1	1	1	1	1	2	1	2	1	2	1	2	1	1	4	2	1	2	1	1	2	2	2	1	1	1	1	1	1	1	1	1	22	8	3
1	2	4	2	3	2	3	2	2	2	2	9	1	1	1	1	1	1	1	0	1	1	1	2	2	1	1	1	1	2	2	1	2	1	1	1	1	1	1	2	2	2	1	1	1	2	1	23	7	4
1	2	3	2	1	1	1	1	1	1	1	0	1	1	1	1	1	1	1	0	1	1	1	1	1	1	1	1	1	0	1	1	1	1	1	1	1	3	1	1	1	1	1	1	1	1	1	19	3	2
1	2	3	2	2	1	3	3	1	2	1	6	1	1	1	1	1	1	1	0	1	1	1	1	1	1	1	1	1	0	1	1	1	1	1	1	1	1	1	1	1	1	1	1	1	1	1	17	5	2
2	2	3	2	3	2	2	2	1	1	1	5	1	1	1	1	1	1	1	0	1	1	1	1	1	1	1	1	1	0	1	1	2	1	1	1	1	1	1	1	1	1	2	1	1	1	1	19	5	3
2	2	4	2	2	2	4	2	3	2	2	10	2	2	3	2	2	2	2	8	2	2	2	2	2	2	2	2	2	9	2	2	2	2	2	2	2	2	2	2	2	2	2	2	2	2	2	34	6	5
2	2	3	2	1	2	4	2	2	2	2	8	1	1	1	1	1	1	1	0	1	1	1	1	1	1	1	1	1	0	1	1	1	1	1	1	1	1	1	1	1	1	1	1	1	1	1	17	5	4
2	2	2	2	3	3	3	2	4	4	4	16	1	1	1	1	1	1	2	1	1	1	1	1	1	1	1	1	1	0	2	1	2	2	1	1	1	1	1	1	1	1	1	1	1	1	1	20	11	7
2	2	1	2	1	3	3	2	3	3	2	10	2	2	2	3	2	2	1	7	1	1	2	2	1	2	2	1	1	4	2	1	1	1	1	1	1	2	1	1	1	1	2	1	2	2	1	22	6	6
1	2	3	2	3	1	3	2	1	2	2	7	1	1	1	1	1	1	2	1	1	1	1	2	1	1	1	1	1	1	1	1	2	2	1	1	1	2	1	2	1	1	2	1	1	2	1	23	7	2
2	2	3	2	2	2	3	2	2	2	2	8	1	1	1	1	1	1	1	0	1	1	1	1	1	1	1	1	1	0	1	1	1	1	1	1	1	1	1	1	1	1	1	1	1	1	1	17	6	4
2	2	2	2	2	2	3	2	2	2	2	8	2	2	2	2	2	2	2	7	2	1	2	2	1	1	1	1	1	3	2	1	2	2	2	2	2	2	1	1	1	1	2	1	1	2	1	26	6	4
2	2	2	2	3	2	3	2	3	2	2	10	1	1	1	1	1	1	1	0	1	1	1	1	1	1	1	1	1	0	1	1	1	1	1	1	1	1	1	1	1	1	1	1	1	1	1	17	7	5
2	2	2	2	3	3	4	2	3	2	2	12	2	2	2	1	1	1	2	4	2	1	1	2	2	1	1	1	1	3	1	1	2	2	1	1	2	2	1	1	1	1	2	1	1	2	1	23	7	6
1	2	1	2	1	1	2	1	3	2	2	5	1	1	1	1	1	1	1	0	1	1	1	1	1	1	1	1	1	0	1	1	1	1	1	1	2	1	1	1	2	1	1	1	1	1	1	19	5	4
2	2	2	2	5	3	4	4	5	4	5	23	2	4	3	2	2	3	4	13	2	4	2	2	2	2	3	4	1	13	2	2	4	3	2	2	3	2	3	2	2	2	3	3	2	4	3	44	14	8
2	2	3	2	2	1	3	2	3	1	3	8	2	2	1	1	2	1	1	3	1	1	1	1	1	1	1	1	1	0	1	1	1	2	1	1	1	1	1	1	1	1	2	1	1	2	2	21	6	4
1	2	3	2	1	1	3	1	1	3	1	4	1	1	1	1	1	1	1	0	1	1	2	2	1	1	1	1	1	2	1	1	1	1	1	1	1	1	1	1	1	1	2	1	1	2	1	19	5	2
2	2	3	2	2	2	2	1	4	3	3	10	1	1	3	3	1	3	3	8	2	2	2	2	2	1	2	1	1	6	1	1	1	1	1	1	1	2	2	2	2	2	2	1	2	3	1	26	8	6
1	2	1	2	1	1	1	1	1	1	1	0	1	1	1	1	1	1	1	0	1	1	1	1	1	1	1	1	1	0	1	1	1	1	1	1	1	1	1	1	1	1	1	1	1	1	1	17	3	2
1	2	3	2	2	1	1	1	1	1	1	1	2	1	2	1	1	2	1	3	2	1	2	2	1	1	1	1	1	3	1	1	1	1	2	1	2	2	2	2	2	2	2	2	2	2	2	29	4	2
2	2	1	2	3	1	1	1	3	2	1	5	2	1	2	1	4	1	1	5	2	1	1	2	1	1	1	1	1	2	2	1	2	2	1	2	5	2	2	2	1	1	2	1	1	2	1	30	6	4
1	2	1	2	1	1	1	1	1	1	1	0	1	1	1	1	1	1	1	0	1	1	1	1	1	1	1	1	1	0	1	1	1	1	1	1	1	1	1	1	1	1	2	1	1	1	1	18	3	2
2	2	3	2	3	2	2	2	1	2	2	7	1	1	1	1	1	2	1	1	2	1	2	2	2	1	1	1	1	4	1	1	1	1	1	2	2	2	2	2	1	1	2	2	1	2	1	25	7	3
2	2	3	1	1	2	4	5	5	3	3	16	2	1	3	2	1	1	1	4	2	1	2	2	1	1	1	1	1	3	2	1	1	2	1	1	1	1	2	1	2	2	2	1	2	3	2	27	7	7
2	2	2	2	1	1	3	1	1	1	1	2	1	1	1	1	1	1	1	0	1	1	1	1	1	1	1	1	1	0	1	1	1	1	1	1	1	1	1	1	1	1	2	1	1	2	1	19	3	2
2	2	1	2	1	2	3	1	3	3	1	7	1	2	2	1	1	1	1	2	1	1	1	1	1	1	1	1	1	0	1	1	1	1	1	1	1	1	1	1	1	1	1	1	1	2	1	18	5	5
2	2	2	2	3	1	2	2	2	3	2	8	2	2	2	1	1	2	2	5	2	1	2	2	1	2	1	1	1	4	1	1	2	2	1	1	1	2	1	2	1	2	2	2	1	2	1	25	8	3
1	2	2	2	3	3	4	4	4	4	4	19	2	2	2	3	2	2	2	8	2	2	2	2	2	2	3	3	1	10	2	1	2	2	2	2	2	2	2	2	1	2	2	2	2	2	2	32	11	7
2	2	2	2	1	2	2	2	2	2	2	6	1	1	1	1	1	1	1	0	1	1	1	1	1	1	1	1	1	0	1	1	1	1	1	1	1	1	1	1	1	1	1	1	1	1	1	17	5	4
1	2	3	2	1	2	2	2	3	3	1	7	3	2	3	2	1	2	2	8	1	2	1	1	1	2	1	2	1	3	3	1	2	4	2	1	1	1	2	2	2	2	3	2	2	2	1	33	5	5
2	2	1	2	2	1	3	2	3	3	1	8	1	1	2	1	1	2	1	2	2	1	2	1	1	1	1	1	1	2	1	1	2	2	1	2	1	1	1	1	1	1	2	1	1	2	1	22	6	4
2	2	3	2	1	1	5	3	4	3	1	11	4	4	4	4	2	3	4	18	1	4	4	3	3	1	1	1	1	10	1	1	1	1	1	1	1	1	1	2	1	1	3	3	1	3	2	25	5	5
2	2	1	2	2	1	3	3	2	2	2	8	2	1	1	1	1	1	2	2	1	2	1	1	1	1	1	1	1	1	2	1	1	2	1	1	1	1	1	1	1	1	1	1	1	1	1	19	6	3
2	2	1	2	1	1	1	1	1	1	1	0	1	1	1	1	1	1	1	0	1	1	1	1	1	1	1	1	1	0	1	1	1	1	1	1	1	1	1	1	1	1	1	1	1	1	1	17	3	2
2	2	1	2	3	3	3	3	3	3	3	14	2	2	2	2	2	2	2	7	2	2	2	2	2	2	2	2	2	9	2	2	2	2	2	2	2	2	2	2	2	2	2	2	2	2	2	34	9	6
2	2	3	2	2	1	4	4	4	1	1	10	1	1	1	1	1	1	1	0	1	1	1	1	1	1	1	1	1	0	1	1	1	1	1	1	1	1	1	1	1	1	1	1	1	2	1	18	4	5
2	2	1	2	1	1	2	1	1	1	1	1	1	1	2	1	1	1	2	2	1	1	1	3	1	1	1	1	1	2	2	1	1	1	1	1	1	1	1	2	1	1	1	1	2	2	1	21	3	2
1	2	3	2	3	2	3	3	5	3	2	14	2	3	2	1	1	2	2	6	4	2	2	3	2	3	2	2	2	13	2	2	2	2	2	3	2	2	2	2	2	2	2	1	1	3	2	34	8	7
2	2	2	2	2	2	4	2	4	3	2	12	2	2	1	1	1	1	1	2	1	1	1	1	1	1	1	1	1	0	2	1	2	2	1	1	1	2	1	1	1	1	2	2	1	2	1	24	7	6
2	2	1	2	3	2	1	2	3	3	2	9	2	1	1	1	1	1	2	2	2	1	2	2	1	1	2	1	1	4	2	1	1	2	2	2	1	1	1	1	2	1	2	1	2	2	1	25	8	5
2	2	3	2	3	1	4	3	4	3	2	13	2	2	2	2	1	2	3	7	2	2	2	2	2	2	2	1	1	7	2	2	2	2	2	2	2	1	2	2	2	2	2	2	2	2	3	34	8	5
2	2	1	2	3	1	4	2	2	3	1	9	2	1	2	1	1	2	1	3	1	1	2	2	1	1	1	1	1	2	2	2	2	1	1	1	2	2	1	1	1	1	2	1	1	2	1	24	7	3
2	2	3	2	3	2	1	2	2	2	2	7	1	1	1	1	1	1	1	0	1	1	1	1	1	1	1	1	1	0	1	1	1	1	1	1	1	1	1	2	1	1	2	1	1	1	1	19	7	4
1	2	1	2	2	2	4	3	5	4	2	15	1	1	1	1	1	1	1	0	1	1	1	1	1	1	1	1	1	0	1	1	2	2	1	2	1	1	1	2	2	2	1	1	1	2	1	24	8	7
2	2	3	2	2	2	2	2	4	3	1	9	1	2	1	1	1	1	2	2	2	1	1	2	1	1	1	1	1	2	1	1	1	1	1	1	1	1	1	1	1	1	1	1	1	3	1	19	6	6
2	2	2	2	2	1	3	1	4	1	1	6	1	1	1	1	1	1	1	0	1	1	1	1	1	1	1	1	1	0	1	1	1	1	1	1	1	1	1	1	1	1	1	1	1	2	1	18	4	5
1	2	1	2	1	1	3	1	2	2	1	4	1	1	1	1	1	1	1	0	1	1	1	1	1	1	1	1	1	0	1	1	1	1	1	1	1	2	1	1	1	1	1	1	1	1	1	18	4	3
2	2	3	2	1	1	3	1	1	2	2	4	1	1	1	1	1	1	1	0	1	1	1	1	1	1	1	1	1	0	1	1	1	1	1	1	1	1	1	1	1	1	1	1	1	2	1	18	5	2
2	2	3	2	2	2	2	2	2	2	2	7	2	1	1	1	1	1	2	2	1	1	1	1	2	1	1	1	1	1	1	1	1	1	1	1	1	1	1	1	1	1	1	1	1	1	1	17	6	4
1	2	1	2	1	1	2	1	2	1	1	2	1	1	1	1	1	1	1	0	1	1	1	1	1	1	1	1	1	0	1	1	1	1	1	1	1	2	1	1	1	1	1	1	1	2	1	19	3	3
2	2	3	1	3	2	4	3	3	3	3	14	1	1	2	1	1	1	2	2	1	1	1	1	1	1	1	1	1	0	1	1	2	1	1	1	1	3	1	1	1	2	2	1	1	2	1	23	9	5
2	2	2	2	2	1	3	3	2	3	3	10	2	1	1	2	1	1	1	2	2	2	2	2	2	2	2	1	2	8	1	1	2	1	1	1	1	2	2	2	1	2	1	2	2	2	1	25	8	3
2	2	3	2	2	1	3	2	4	3	3	11	2	2	4	3	2	3	4	13	2	3	2	2	1	1	1	1	2	6	1	1	2	2	1	1	1	1	1	1	1	1	1	1	1	2	2	21	8	5
1	2	1	2	2	1	3	5	3	3	2	12	2	1	1	1	1	1	2	2	1	1	1	1	1	1	2	1	1	1	1	1	2	1	1	1	1	1	1	1	1	1	1	1	1	1	1	18	7	4
1	2	2	2	1	1	2	2	2	2	2	5	2	1	1	1	1	1	1	1	1	1	1	1	1	1	1	1	1	0	1	1	1	1	1	1	1	1	1	1	1	1	1	1	1	1	1	17	5	3
1	2	1	2	1	2	3	1	2	3	2	7	1	1	2	1	1	1	1	1	1	1	4	2	1	1	1	1	1	4	2	1	1	1	1	1	1	1	1	2	1	1	1	1	1	1	1	19	6	4
1	2	1	2	1	2	3	1	2	2	1	5	1	1	1	1	1	1	1	0	1	1	2	1	1	1	1	1	1	1	1	1	2	1	1	2	1	2	1	1	1	1	2	1	1	2	1	22	4	4
2	2	3	2	1	1	2	2	5	3	2	9	2	1	3	3	2	3	2	9	2	3	4	2	2	2	1	2	1	10	2	1	2	2	2	2	2	2	2	2	2	2	5	4	3	3	4	42	6	6
1	2	3	1	1	2	4	2	2	2	2	8	3	1	1	1	1	2	1	3	2	1	2	2	1	1	1	1	1	3	1	1	1	1	1	1	2	1	2	2	1	1	2	1	2	2	1	23	5	4
1	2	3	2	1	1	2	1	2	1	1	2	2	1	2	1	1	2	1	3	1	1	1	2	1	1	1	1	1	1	1	1	2	1	1	1	1	1	1	1	1	2	1	1	1	3	1	21	3	3
2	2	3	2	3	2	5	1	3	2	2	11	2	1	3	3	1	2	2	7	1	1	2	1	1	1	1	1	1	1	2	2	2	3	2	1	1	1	1	2	2	2	2	2	1	1	1	28	7	5
2	2	1	2	1	1	4	1	1	1	1	3	1	1	1	1	1	1	1	0	1	1	1	3	1	1	1	1	1	2	2	1	2	2	1	1	1	1	1	1	1	2	1	1	1	1	1	21	3	2
2	2	3	2	2	2	2	2	2	2	2	7	1	1	1	1	1	1	1	0	1	1	1	1	1	1	1	1	1	0	2	1	2	1	1	1	2	2	1	1	1	1	1	1	1	1	1	21	6	4
2	2	2	2	1	1	3	1	4	3	2	8	2	1	1	1	1	1	2	2	1	1	2	1	1	1	1	1	1	1	1	1	1	1	1	1	1	1	1	1	1	1	2	1	1	1	1	18	6	5
2	2	3	2	3	3	3	3	3	3	3	14	2	2	2	2	1	2	2	6	2	1	2	2	1	1	1	2	2	5	2	1	1	2	1	2	2	2	2	2	2	2	2	2	2	2	2	31	9	6
1	2	2	2	2	2	3	2	1	3	1	7	2	1	1	2	1	1	1	2	1	2	1	1	1	2	2	1	1	3	2	1	1	1	1	1	2	3	2	1	1	2	2	1	2	1	1	25	6	3
1	2	3	2	4	1	5	4	5	3	3	18	2	1	3	3	1	2	2	7	2	2	2	3	2	2	1	1	1	7	2	3	2	2	2	2	2	1	1	2	1	2	2	2	1	2	1	30	10	6
2	2	3	2	3	3	3	3	4	3	2	14	2	1	2	1	1	2	2	4	1	1	1	1	1	1	1	1	1	0	1	1	1	2	1	1	1	1	1	1	1	2	1	1	1	2	1	20	8	7
1	2	2	2	3	2	3	3	3	3	3	13	2	2	2	2	1	1	2	5	1	1	2	1	1	1	1	1	1	1	2	2	2	2	1	1	1	1	1	1	1	2	2	1	1	2	1	24	9	5
1	2	2	2	1	1	1	1	1	3	1	2	1	1	2	2	1	1	2	3	1	1	1	2	1	1	1	1	1	1	2	1	1	1	1	1	1	1	1	1	1	1	2	1	1	1	1	19	5	2
2	2	3	2	3	2	4	3	3	3	3	14	2	2	2	2	1	2	2	6	2	2	2	2	2	2	1	1	1	6	2	1	2	2	1	1	1	1	1	2	2	1	2	2	1	2	1	25	9	5
1	2	3	2	1	1	1	1	1	1	1	0	1	1	1	1	1	1	1	0	1	1	1	1	1	1	1	1	1	0	1	1	1	1	1	1	1	1	1	1	1	1	1	1	1	1	1	17	3	2
2	2	3	2	2	3	3	3	3	2	2	11	2	1	1	1	1	1	1	1	1	1	1	1	1	1	1	1	1	0	2	1	2	1	1	1	1	1	1	2	1	2	2	1	1	1	1	22	6	6
2	2	3	2	2	2	2	2	2	1	1	5	2	1	1	1	1	1	1	1	1	1	1	1	1	1	1	1	1	0	1	1	1	1	1	1	1	1	2	1	1	2	1	1	2	2	2	22	4	4
1	2	2	2	1	2	2	2	4	3	2	9	2	1	2	1	2	2	2	5	2	1	2	2	1	1	1	1	1	3	1	2	1	1	1	1	1	1	1	2	1	1	3	2	2	2	1	24	6	6
1	2	3	2	4	1	4	3	4	4	3	16	2	2	1	3	3	2	1	7	1	2	4	3	1	1	1	1	1	6	2	2	2	2	2	2	2	1	1	2	1	2	2	2	2	3	2	32	11	5
2	2	2	2	2	1	5	3	3	3	2	12	1	1	1	1	1	1	1	0	1	1	2	2	4	1	1	1	1	5	1	1	2	1	1	1	1	1	1	2	2	2	2	2	1	1	1	23	7	4
2	2	3	2	3	2	3	3	2	3	3	12	2	1	2	2	1	2	2	5	2	2	2	2	2	2	2	2	1	8	2	1	2	2	1	2	2	1	2	2	2	2	3	2	2	2	2	32	9	4
2	2	3	2	2	2	3	2	3	2	2	9	3	2	2	1	1	2	2	6	2	2	1	1	1	1	1	1	1	2	2	1	2	2	1	1	2	1	1	1	1	2	2	1	1	2	1	24	6	5
2	2	3	2	2	1	3	2	2	3	2	8	2	2	2	2	1	1	2	5	1	1	1	1	1	1	1	1	1	0	2	1	2	2	1	1	1	1	1	1	1	1	1	1	1	1	1	20	7	3
2	2	3	2	1	2	3	4	5	1	2	11	2	1	1	1	1	2	1	2	2	1	3	2	3	1	2	1	1	7	2	2	2	2	1	1	1	1	1	1	1	2	3	2	2	2	1	27	4	7
1	2	3	2	1	1	2	1	2	1	1	2	1	1	1	1	1	1	1	0	1	1	1	1	1	1	1	1	1	0	1	1	1	1	1	1	1	1	1	1	1	1	1	1	1	1	1	17	3	3
2	2	3	2	2	1	1	1	2	1	1	2	2	1	1	1	1	1	1	1	1	1	2	1	1	1	1	1	1	1	1	1	1	2	1	1	1	1	1	2	1	2	1	1	1	1	1	20	4	3
2	2	2	2	1	1	1	1	1	3	1	2	1	1	1	1	1	1	2	1	1	2	1	1	1	1	2	1	1	2	1	1	1	1	1	1	1	1	1	2	1	1	2	1	2	2	1	21	5	2
2	2	3	2	3	3	3	2	1	3	3	11	2	2	2	2	2	2	2	7	2	2	2	2	2	2	2	2	1	8	2	2	1	2	1	1	2	2	2	1	2	2	2	2	2	2	2	30	9	4
1	2	2	2	1	1	1	1	1	1	1	0	1	1	1	1	1	1	1	0	1	1	1	1	1	1	1	1	1	0	1	1	1	1	1	1	1	1	1	1	1	1	1	1	1	1	1	17	3	2
2	2	2	2	3	2	3	3	2	3	3	12	2	2	2	1	1	1	1	3	1	1	1	1	1	1	1	1	1	0	2	1	2	2	1	2	2	2	1	2	1	1	1	1	1	2	1	25	9	4
2	2	3	2	1	1	1	1	1	1	1	0	1	1	2	1	1	1	1	1	1	1	1	1	1	1	1	1	1	0	1	1	1	1	1	1	1	1	1	1	1	1	1	1	1	1	1	17	3	2
1	2	1	2	3	2	3	3	3	3	3	13	2	2	2	2	2	2	2	7	2	2	2	2	2	2	2	2	2	9	2	2	2	2	2	2	2	2	2	2	2	2	2	2	2	2	2	34	9	5
2	2	3	2	3	3	2	2	2	2	2	9	2	2	2	2	1	2	1	5	2	2	2	2	1	2	1	1	1	5	2	1	2	2	2	1	1	1	2	2	2	2	2	2	2	2	1	29	7	5
2	2	3	2	2	2	3	2	2	2	2	8	2	2	2	1	2	1	1	4	1	2	2	2	1	2	2	2	1	6	1	1	2	2	1	1	1	1	1	1	1	1	2	1	2	3	1	23	6	4
2	2	3	2	2	2	2	2	1	2	2	6	2	2	1	2	1	1	1	3	1	1	1	1	1	1	1	1	1	0	2	1	1	1	1	1	1	1	1	1	1	1	1	1	1	1	1	18	6	3
2	2	3	2	3	2	4	2	4	3	3	14	2	2	1	1	2	1	1	3	2	1	1	1	1	1	1	1	1	1	2	1	1	1	1	1	1	2	1	1	1	1	1	1	1	2	1	20	9	6
2	2	3	2	1	3	3	1	2	2	1	6	1	2	1	1	1	1	2	2	1	2	2	1	1	1	1	1	1	2	2	1	2	2	2	3	2	3	1	2	2	2	2	1	1	1	2	31	4	5
2	2	3	2	3	2	3	2	1	3	1	8	1	1	1	1	1	1	2	1	1	1	2	1	1	1	1	2	1	2	2	2	3	2	1	1	2	1	1	1	2	2	1	2	1	3	3	30	7	3
1	2	3	2	3	3	4	3	2	3	3	14	2	2	2	2	2	1	2	6	1	2	2	1	1	1	1	1	1	2	2	1	2	2	1	2	1	2	2	1	1	1	1	1	1	2	1	24	9	5
2	2	3	2	2	1	5	2	2	3	2	10	2	2	2	2	2	2	2	7	1	2	1	1	1	1	1	1	1	1	2	1	2	1	1	2	2	1	1	1	1	1	1	1	1	2	2	23	7	3
2	2	3	2	4	1	1	1	1	1	1	3	1	1	1	1	1	1	1	0	1	1	1	1	1	1	1	1	1	0	1	1	1	1	1	1	1	1	1	1	1	1	1	1	1	1	5	21	6	2
2	2	3	2	3	1	4	1	4	2	2	10	1	1	1	1	1	1	1	0	1	1	1	1	1	1	1	1	1	0	1	1	1	1	1	1	1	2	1	1	1	1	2	1	1	2	1	20	7	5
2	2	3	2	2	2	3	2	2	2	2	8	1	1	1	1	1	1	2	1	1	1	2	1	1	1	1	1	1	1	2	1	2	1	1	1	1	1	1	1	1	1	2	1	1	1	1	20	6	4
1	2	1	2	1	1	2	1	1	1	1	1	2	1	1	1	1	1	1	1	1	1	1	1	2	1	1	1	1	1	1	1	1	1	1	1	1	1	1	1	1	1	1	1	1	1	1	17	3	2
1	2	1	2	1	1	1	1	1	1	1	0	1	1	1	1	1	1	1	0	1	1	1	1	1	1	1	1	1	0	1	1	1	1	1	1	1	1	1	1	1	1	1	1	1	1	1	17	3	2
1	2	2	2	2	1	3	1	1	1	1	3	1	1	1	1	1	1	1	0	1	1	1	1	1	1	1	1	1	0	1	1	1	1	1	1	1	1	1	1	1	1	1	1	1	1	1	17	4	2
2	2	1	2	1	1	1	1	1	1	1	0	1	1	1	1	1	1	1	0	1	1	1	1	1	1	1	1	1	0	1	1	1	1	1	1	1	1	1	1	1	1	1	1	1	1	1	17	3	2
1	2	1	2	5	3	4	3	4	5	3	20	2	2	3	2	3	2	3	10	2	3	3	2	2	1	2	2	1	9	2	1	2	2	1	1	2	1	1	2	1	1	2	2	2	3	1	27	13	7
2	2	1	2	1	1	1	1	1	1	1	0	1	1	1	1	1	1	1	0	1	1	1	1	1	1	1	1	1	0	1	1	1	1	1	1	1	1	1	1	1	1	1	1	1	1	1	17	3	2
2	2	3	2	3	3	4	3	3	3	2	14	2	2	2	2	2	2	2	7	2	2	2	2	1	1	1	2	1	5	1	1	2	2	1	1	1	1	1	2	1	2	1	2	2	2	2	25	8	6
1	2	1	2	3	2	3	3	1	3	2	10	1	2	1	1	1	1	1	1	1	1	2	2	1	1	2	1	1	3	2	1	1	1	2	1	1	2	1	2	2	2	2	2	1	2	1	26	8	3
1	2	3	2	3	1	4	2	2	1	2	8	1	1	1	4	1	1	1	3	1	1	1	2	1	1	1	1	1	1	1	1	1	1	1	1	1	1	1	1	1	1	1	1	1	2	1	18	6	3
2	2	2	2	3	3	2	3	1	3	2	10	2	1	2	2	2	2	2	6	2	2	2	1	2	2	2	1	1	6	2	1	1	2	2	2	2	2	1	1	2	2	2	2	2	2	2	30	8	4
2	2	3	2	2	2	2	2	1	1	1	4	1	1	1	1	1	1	1	0	1	1	1	1	1	1	1	1	1	0	1	1	1	1	1	1	1	1	1	1	1	1	1	1	1	1	1	17	4	3
2	2	3	2	1	1	1	3	4	3	3	9	2	2	1	1	1	1	1	2	2	1	1	1	1	1	2	1	1	2	1	1	1	1	1	2	1	1	1	1	1	1	2	2	1	1	1	20	7	5
2	2	3	2	2	2	2	2	1	3	2	7	1	1	1	1	1	1	2	1	1	1	1	1	1	1	1	1	1	0	1	1	1	1	1	1	1	1	1	1	1	1	1	1	1	2	1	18	7	3
2	2	3	2	3	2	4	1	3	3	3	12	2	2	2	2	1	2	1	5	2	1	2	2	1	1	1	1	1	3	2	2	2	2	2	2	2	1	1	2	1	2	2	2	2	2	2	31	9	5
2	2	3	2	3	1	4	2	3	4	2	12	2	2	3	3	1	3	2	9	2	2	2	2	1	1	2	2	1	6	2	1	1	2	2	2	2	2	2	1	1	1	1	2	2	3	1	28	9	4
1	2	3	2	4	1	5	3	2	4	4	16	2	2	3	4	2	2	2	10	2	2	3	2	3	2	1	1	1	8	2	2	2	3	3	3	3	3	3	4	3	2	2	2	3	3	3	46	12	3
1	2	3	2	2	1	3	2	2	2	2	7	1	1	1	1	1	1	1	0	1	1	1	1	1	1	1	1	1	0	1	1	1	1	1	1	2	2	1	1	1	1	1	1	1	2	1	20	6	3
1	2	3	2	1	1	1	1	1	1	1	0	1	1	1	1	1	1	1	0	1	1	1	1	1	1	1	1	1	0	1	1	1	1	1	1	1	1	1	1	1	2	1	1	1	1	1	18	3	2
2	2	3	2	3	1	4	3	4	3	4	15	2	2	2	1	1	1	1	3	1	2	1	2	1	1	1	1	1	2	1	1	1	2	1	1	1	1	1	1	1	1	1	1	2	2	1	20	10	5
2	2	1	2	3	2	3	2	4	3	4	14	1	4	1	3	1	2	4	9	1	1	1	1	1	1	1	1	1	0	1	1	1	1	1	1	1	1	1	1	1	1	1	1	1	1	1	17	10	6
2	2	2	2	3	1	4	3	1	3	3	11	3	3	3	2	2	4	3	13	4	2	3	2	3	2	2	1	1	11	2	3	2	2	2	2	2	2	1	2	1	1	2	1	2	2	2	31	9	2
1	2	1	2	3	1	4	3	4	3	2	13	1	1	3	2	2	2	1	5	1	1	1	1	1	2	1	1	1	1	2	1	1	1	1	1	1	2	1	2	1	1	1	1	2	2	1	22	8	5
2	2	2	2	1	1	3	2	3	3	2	8	1	1	1	1	1	1	1	0	1	1	2	2	1	1	1	1	1	2	1	1	1	1	1	2	1	1	1	1	1	1	2	1	1	1	1	19	6	4
1	2	3	2	2	1	3	3	4	3	3	12	1	1	2	1	1	2	2	3	1	1	2	2	1	1	1	1	1	2	2	1	2	2	1	1	1	2	1	1	1	1	2	2	2	1	1	24	8	5
2	2	1	2	3	3	2	2	4	3	3	13	2	1	2	2	1	2	1	4	1	1	2	2	2	2	2	1	1	5	2	2	1	2	2	1	2	3	2	2	2	2	2	2	2	2	1	32	9	7
2	2	1	2	3	1	3	3	2	3	2	10	2	2	2	2	1	1	2	5	1	2	2	2	1	1	1	1	1	3	1	1	2	2	1	1	1	1	1	5	1	1	2	1	1	4	1	27	8	3
2	2	1	2	3	1	4	3	5	2	3	14	1	1	1	1	1	1	2	1	2	1	1	2	1	2	1	1	1	3	2	2	2	2	1	1	1	1	1	1	1	1	1	1	1	2	1	22	8	6
2	2	3	2	2	2	4	3	4	3	3	14	2	2	3	2	2	2	2	8	2	1	2	2	1	1	1	2	1	4	1	1	1	2	1	1	1	2	1	2	1	2	2	2	1	2	2	25	8	6
2	2	2	2	1	2	3	2	2	1	2	6	1	1	1	1	1	1	1	0	1	1	1	1	1	1	1	1	1	0	1	1	1	2	1	1	2	1	1	1	1	2	1	1	1	2	1	21	4	4
2	2	3	2	3	2	2	1	1	2	2	6	1	1	1	1	1	1	1	0	1	1	1	1	1	1	1	1	1	0	1	1	1	1	1	1	1	1	1	1	2	2	1	1	1	1	1	19	7	3
2	2	2	2	3	2	1	2	2	3	2	8	2	2	2	2	2	1	2	6	1	1	3	1	1	1	1	1	1	2	1	2	1	2	1	1	2	2	1	1	1	1	3	1	2	2	1	25	8	4
2	2	1	2	3	3	3	2	3	3	3	13	2	2	2	2	2	2	2	7	2	2	2	2	1	1	2	2	1	6	2	2	3	3	2	2	2	2	1	2	1	3	2	2	2	3	3	37	9	6
1	2	1	2	1	1	1	1	1	1	1	0	1	1	1	1	1	1	1	0	1	1	1	1	1	1	1	1	1	0	1	1	1	1	1	1	1	1	1	1	1	1	1	1	1	1	1	17	3	2
2	2	3	2	1	2	2	2	2	2	2	6	2	1	2	1	1	1	2	3	2	1	2	2	2	1	2	1	1	5	2	1	2	2	2	2	1	1	1	2	2	1	2	2	2	2	1	28	5	4
2	2	2	2	1	1	2	1	2	3	2	5	1	1	1	1	1	2	1	1	1	1	2	1	1	1	1	1	1	1	2	2	1	2	2	1	1	1	1	1	1	1	2	1	1	2	1	23	6	3
2	2	3	2	3	2	3	3	3	3	3	13	2	2	2	2	1	1	2	5	1	1	1	1	1	1	1	1	1	0	2	1	2	2	1	1	1	1	2	2	1	1	1	1	1	2	1	23	9	5
2	2	3	2	1	1	4	4	4	2	2	11	2	2	2	1	1	1	2	4	1	1	1	1	1	1	1	1	1	0	2	1	2	2	1	2	2	1	1	1	1	1	1	1	1	2	1	23	5	5
2	2	3	2	1	1	1	1	3	3	3	6	1	1	1	1	1	1	2	1	1	1	1	1	1	1	1	1	1	0	1	1	1	1	1	1	1	1	1	1	1	1	1	1	1	2	1	18	7	4
2	2	2	2	2	1	3	1	1	1	1	3	1	1	1	1	1	1	1	0	1	1	1	1	1	1	1	1	1	0	1	1	1	1	1	1	1	1	1	1	1	1	1	1	1	1	1	17	4	2
2	2	3	2	3	2	2	2	5	3	2	12	2	2	3	2	1	2	1	6	1	2	2	2	1	1	1	1	1	3	2	1	1	2	2	2	2	2	1	2	1	1	4	2	2	3	1	31	8	7
1	2	4	2	2	2	3	2	1	3	2	8	2	1	1	1	1	1	1	1	1	1	1	1	1	1	1	1	1	0	2	1	1	1	1	1	2	2	2	1	2	2	1	3	2	2	2	28	7	3
2	2	3	2	4	2	4	4	4	4	4	19	4	4	3	4	2	2	3	15	2	2	4	3	4	2	3	4	1	16	3	2	3	3	3	2	2	1	2	3	1	2	4	3	2	3	4	43	12	6
2	2	2	2	1	2	3	4	3	2	1	9	1	1	1	1	1	1	1	0	1	1	1	1	1	1	1	1	1	0	1	1	1	1	1	1	1	1	1	2	1	1	1	1	1	1	1	18	4	5
2	2	3	2	1	2	1	3	3	3	1	7	2	2	2	1	1	1	1	3	1	1	2	1	2	1	1	1	1	2	2	1	1	1	2	1	1	1	1	1	1	1	2	1	1	2	1	21	5	5
1	2	3	2	2	2	4	2	4	3	2	12	2	2	2	3	3	3	3	11	2	1	3	3	3	2	2	2	1	10	2	1	2	2	2	2	2	2	2	2	2	2	3	2	2	2	2	34	7	6
2	2	3	2	3	2	4	2	2	3	2	11	1	1	1	1	1	1	1	0	1	1	1	1	1	1	1	1	1	0	1	1	1	2	1	1	1	2	2	2	1	2	1	1	1	2	1	23	8	4
2	2	2	2	1	1	2	1	2	1	3	4	1	1	1	1	1	1	1	0	1	1	1	1	1	1	1	1	1	0	1	1	2	1	1	1	1	1	1	1	1	1	1	1	1	2	1	19	5	3
2	2	1	2	2	2	4	3	4	2	2	12	1	1	1	1	1	1	2	1	1	1	1	1	1	1	1	1	1	0	1	1	1	1	1	1	1	1	1	2	1	1	1	1	1	1	1	18	6	6
2	2	3	2	1	1	3	1	1	1	1	2	1	1	1	1	1	1	1	0	1	1	1	1	1	1	1	1	1	0	1	1	1	1	1	1	1	1	1	1	1	1	1	1	1	2	1	18	3	2
2	2	3	2	3	1	4	3	4	3	3	14	2	1	2	1	1	1	1	2	2	1	2	2	2	1	1	1	1	4	2	2	2	2	1	1	2	2	1	2	1	2	3	2	2	2	2	31	9	5
2	2	3	2	1	1	1	1	1	1	1	0	1	1	1	1	1	1	1	0	1	1	1	1	1	1	1	1	1	0	1	1	1	1	1	1	1	1	1	1	1	1	1	1	1	1	1	17	3	2
2	2	3	2	2	2	3	2	1	2	2	7	1	1	1	1	1	1	1	0	2	1	1	1	1	1	1	1	1	1	1	1	1	1	1	1	1	1	1	1	1	1	1	1	2	2	1	19	6	3
1	2	3	2	2	1	3	1	2	2	2	6	1	1	1	1	1	1	1	0	1	1	1	1	1	1	1	1	1	0	1	1	1	2	1	1	2	1	1	1	1	2	1	1	1	1	1	20	6	3
2	2	2	2	1	2	4	3	4	3	3	13	4	4	4	4	2	2	3	16	1	2	2	2	3	1	2	1	1	6	2	1	3	2	1	1	2	1	3	2	2	2	2	1	1	2	1	29	7	6
2	2	3	2	2	1	1	1	3	2	1	4	1	1	1	1	1	1	1	0	1	1	1	1	1	1	1	1	1	0	2	1	1	1	1	1	1	1	1	1	1	1	1	1	1	1	1	18	5	4
2	2	3	1	1	1	4	3	4	3	3	12	1	1	1	1	1	1	1	0	1	1	1	1	1	1	2	1	1	1	2	1	2	2	2	2	2	2	2	2	3	1	1	2	1	1	1	29	7	5
2	2	3	2	2	1	2	2	1	3	2	6	2	1	2	2	2	2	2	6	2	2	2	2	1	1	1	1	1	4	2	2	1	2	1	1	1	1	1	1	1	2	2	1	1	1	1	22	7	2
2	2	1	2	1	2	3	1	1	2	1	4	1	1	1	1	1	1	1	0	1	1	1	1	1	1	1	1	1	0	1	1	1	2	1	1	1	2	1	1	1	1	1	1	1	2	1	20	4	3
2	2	2	1	4	3	4	3	4	4	3	18	2	2	3	3	2	3	3	11	3	3	2	3	2	2	2	2	1	11	2	2	2	2	2	2	2	1	2	2	1	2	2	2	2	2	2	32	11	7
2	2	3	2	3	3	2	3	2	3	1	10	1	1	1	1	1	1	1	0	2	1	1	1	1	1	1	1	1	1	2	2	2	2	1	1	1	1	1	1	1	2	2	1	1	2	1	24	7	5
2	2	3	2	1	1	1	1	1	1	1	0	1	1	1	1	1	1	1	0	1	1	1	1	1	1	1	1	1	0	1	1	1	1	1	1	1	2	1	1	1	1	1	1	1	1	1	18	3	2
2	2	2	2	1	2	4	3	3	1	1	8	1	1	2	1	1	1	2	2	1	1	2	1	2	1	1	1	1	2	2	1	1	1	1	1	2	1	1	1	2	1	2	1	1	2	1	22	3	5
2	2	3	2	2	1	2	2	2	2	1	5	1	1	1	1	1	1	1	0	1	1	1	1	1	1	1	1	1	0	1	1	1	1	1	1	1	1	1	1	1	1	1	1	1	1	1	17	5	3
1	2	3	2	1	2	3	2	1	1	1	4	1	1	1	1	1	1	1	0	1	1	1	1	2	1	1	1	1	1	2	1	1	2	1	1	1	2	1	1	1	1	1	1	1	2	1	21	3	3
2	2	3	2	2	1	1	2	1	2	1	3	2	1	2	1	1	1	2	3	1	1	1	1	1	1	1	1	1	0	1	1	1	1	1	1	1	1	1	1	1	1	1	1	1	1	1	17	5	2
1	2	3	2	2	1	3	2	4	2	1	8	1	1	3	1	1	1	4	5	1	1	1	1	1	1	1	1	1	0	1	1	2	1	1	1	2	1	1	2	1	1	1	1	2	2	1	22	5	5
2	2	3	2	1	3	3	3	3	1	1	8	2	1	1	1	1	1	2	2	1	1	1	1	1	1	1	1	1	0	1	1	3	1	1	1	1	1	1	1	1	1	1	1	1	2	1	20	3	6
2	2	3	2	3	2	2	2	1	3	1	7	1	1	2	1	1	2	2	3	4	1	1	1	1	1	1	1	1	3	1	1	2	1	1	1	1	2	1	1	1	2	1	1	1	2	1	21	7	3
2	2	3	2	1	1	4	1	1	1	1	3	1	1	1	1	1	1	1	0	1	1	1	1	1	1	1	1	1	0	1	1	1	1	1	1	1	1	1	1	1	1	1	1	1	1	1	17	3	2
2	2	3	2	1	1	3	3	3	3	1	8	2	1	1	1	1	1	2	2	1	1	2	1	1	1	1	1	1	1	2	1	2	2	1	1	1	2	2	1	1	2	2	1	1	2	1	25	5	4
2	2	3	2	1	2	4	2	4	2	2	10	1	1	1	1	1	1	1	0	1	1	2	2	1	1	1	1	1	2	1	1	1	1	1	1	1	1	1	1	1	1	2	1	1	2	1	19	5	6
2	2	3	2	3	2	3	2	2	3	2	10	1	2	2	1	1	1	2	3	1	1	2	1	1	1	1	1	1	1	2	1	2	2	1	1	2	1	1	2	1	1	2	1	1	3	1	25	8	4
1	2	2	2	3	1	4	2	2	3	2	10	3	2	3	4	3	3	3	14	4	3	3	4	3	4	3	3	2	20	3	1	2	2	2	1	2	1	2	4	5	5	3	3	4	2	2	44	8	3
1	2	2	2	3	2	4	2	2	2	2	10	1	1	1	1	1	1	1	0	1	1	2	1	1	1	1	1	1	1	1	1	1	2	1	1	1	1	1	1	1	1	1	1	1	2	1	19	7	4
2	2	3	2	2	1	3	2	1	3	1	6	2	1	1	2	1	1	2	3	1	1	2	1	2	1	1	1	1	2	2	1	1	2	2	2	2	2	1	2	2	2	2	1	2	2	2	30	6	2
2	2	3	2	3	3	4	3	3	3	3	15	2	2	2	2	1	2	2	6	2	2	2	2	1	2	2	1	1	6	2	2	2	2	1	1	1	1	2	2	1	1	2	2	2	2	2	28	9	6
1	2	2	2	3	4	4	3	4	3	2	16	3	2	4	3	3	2	2	12	2	1	3	2	3	1	1	2	1	7	1	1	1	2	2	1	1	2	1	1	2	1	2	2	2	2	1	25	8	8
1	2	3	2	1	2	4	2	1	2	2	7	1	1	1	1	1	1	1	0	1	1	1	1	1	1	1	1	1	0	2	1	2	1	1	1	2	1	2	1	1	1	2	1	2	3	1	25	5	3
1	2	3	2	4	2	4	4	4	5	3	19	4	4	4	3	2	2	3	15	3	3	4	4	1	3	2	3	1	15	4	2	3	4	2	1	1	2	1	5	2	4	5	4	3	4	2	49	12	6
2	2	3	2	3	1	5	3	5	4	3	17	3	4	3	3	3	2	4	15	1	2	1	1	1	1	1	1	1	1	2	2	2	2	2	2	2	1	1	1	1	2	2	2	2	3	3	32	10	6
2	2	3	2	1	1	4	1	4	1	2	7	1	1	1	1	1	1	1	0	1	1	1	1	1	1	1	1	1	0	1	1	1	1	1	1	1	1	1	1	1	1	1	1	1	1	1	17	4	5
1	2	3	2	5	1	5	5	5	5	5	24	4	4	4	4	4	4	4	21	4	4	2	4	2	3	4	4	1	19	5	5	5	5	5	5	5	4	4	5	4	5	4	4	5	5	5	80	15	6
2	2	2	2	2	3	3	2	2	2	2	9	2	1	1	1	1	1	1	1	2	1	2	2	1	1	1	1	1	3	1	1	1	1	1	1	1	1	1	1	1	1	2	1	1	2	1	19	6	5
1	2	2	2	1	1	2	1	2	1	1	2	1	1	1	1	1	1	1	0	1	1	1	1	1	1	1	1	1	0	1	1	1	1	1	1	1	1	1	2	1	1	1	1	1	2	1	19	3	3
2	2	3	2	1	1	3	1	2	1	1	3	1	1	1	1	1	1	1	0	1	1	1	1	1	1	1	1	1	0	1	1	1	1	1	1	1	1	1	1	1	1	1	1	1	3	1	19	3	3
1	2	3	2	2	2	2	2	1	1	1	4	1	1	1	1	1	1	1	0	1	1	1	1	1	1	1	1	1	0	2	1	1	1	1	1	1	2	1	1	1	1	1	1	1	1	1	19	4	3
2	2	3	2	1	1	3	3	5	4	3	13	1	1	2	1	1	1	2	2	1	1	1	1	1	1	1	1	1	0	1	1	2	2	1	1	2	1	1	1	1	1	1	1	1	1	1	20	8	6
2	2	3	2	4	1	3	3	3	3	2	12	2	1	1	1	1	1	1	1	2	1	1	1	1	2	2	1	1	3	2	1	2	2	1	2	2	2	1	2	1	2	1	2	1	2	1	27	9	4
2	2	3	2	1	2	5	3	2	5	5	16	4	2	3	4	2	3	4	15	2	3	4	3	3	2	3	1	2	14	3	3	5	4	2	1	1	2	2	1	2	4	5	3	3	2	3	46	11	4
2	2	3	2	3	3	3	3	2	3	3	13	2	2	1	2	1	2	2	5	2	2	2	1	1	2	3	1	1	6	2	1	2	2	2	2	2	1	1	2	2	1	1	2	1	2	1	27	9	5
2	2	2	2	1	1	3	2	1	3	3	7	1	1	1	1	1	1	1	0	1	1	1	1	1	1	1	1	1	0	1	1	2	1	1	1	1	1	1	1	1	1	1	1	1	1	1	18	7	2
2	2	1	2	1	1	1	1	1	1	1	0	1	1	1	1	1	1	1	0	1	1	1	1	1	1	1	1	1	0	1	1	1	1	1	1	1	1	1	2	1	1	1	1	1	1	1	18	3	2
2	2	2	2	1	1	4	1	2	2	1	5	1	2	1	1	1	1	1	1	1	1	1	1	1	1	1	1	1	0	2	1	1	1	1	1	1	1	1	1	1	1	1	1	1	2	1	19	4	3
2	2	3	2	3	2	2	3	4	3	3	13	2	1	2	1	1	1	2	3	1	1	1	1	1	1	1	1	1	0	2	1	1	1	1	2	2	1	1	1	2	1	2	1	1	2	1	23	9	6
2	2	2	2	2	1	3	2	1	1	2	5	1	1	2	2	1	1	1	2	2	2	1	2	1	2	2	2	2	7	2	1	2	1	1	2	2	1	1	2	2	2	1	2	2	2	1	27	5	2
2	2	2	2	2	1	3	1	2	3	2	7	2	3	3	1	1	1	2	6	1	1	2	1	1	1	1	1	1	1	1	1	1	2	1	1	1	1	1	1	1	2	3	1	2	1	1	22	7	3
1	2	3	2	4	3	2	5	4	3	4	18	1	1	1	1	1	2	1	1	1	1	1	1	1	1	1	1	2	1	2	1	3	2	1	1	2	2	1	2	3	2	2	1	2	2	1	30	11	7
2	2	3	2	2	1	4	2	1	2	2	7	2	1	2	1	1	1	2	3	1	1	1	1	1	1	1	1	1	0	1	1	2	1	1	1	1	1	1	1	1	1	1	1	1	2	1	19	6	2
2	2	3	2	3	2	3	2	3	3	2	11	2	2	2	1	1	1	1	3	1	2	2	2	1	1	2	1	1	4	2	2	1	2	2	1	1	1	1	1	1	1	2	1	1	2	1	23	8	5
1	2	3	2	3	2	2	3	2	3	2	10	2	2	2	2	1	1	1	4	2	2	3	2	2	1	1	1	1	6	2	2	2	2	1	2	2	2	2	2	1	2	3	1	2	2	1	31	8	4
1	2	2	2	1	2	3	1	2	2	2	6	1	1	1	1	1	1	1	0	1	1	1	1	1	1	1	1	1	0	1	1	1	2	1	2	1	1	1	1	1	1	2	1	1	2	1	21	5	4
2	2	3	2	3	2	4	2	3	3	3	13	2	1	2	2	2	2	2	6	2	2	2	2	1	1	1	1	1	4	2	2	1	2	2	2	2	1	2	2	1	1	2	2	2	3	2	31	9	5
2	2	3	2	1	1	1	1	1	2	1	1	1	1	1	1	1	1	1	0	1	1	1	1	1	1	1	1	1	0	1	1	1	1	1	1	2	1	1	1	1	1	1	1	1	1	1	18	4	2
1	2	3	2	1	2	4	2	4	2	2	10	1	1	1	1	1	1	1	0	1	1	1	1	1	1	1	1	1	0	1	1	1	1	1	1	1	1	1	1	1	1	1	1	1	1	1	17	5	6
1	2	3	2	1	2	2	1	1	1	1	2	1	1	1	1	1	1	1	0	1	1	1	1	1	1	1	1	1	0	1	1	1	1	1	2	2	2	1	1	1	1	1	1	1	1	1	20	3	3
1	2	1	2	1	1	4	3	2	1	1	6	2	1	1	1	1	1	1	1	2	1	2	1	1	1	1	1	1	2	1	2	3	1	1	1	2	1	1	1	1	2	1	1	1	2	1	23	3	3
2	2	2	2	5	1	5	5	5	3	3	20	1	1	1	1	1	1	1	0	1	1	1	1	1	1	1	1	1	0	1	1	1	1	1	1	1	1	1	1	1	1	1	1	1	1	1	17	11	6
1	2	3	2	1	1	3	2	1	2	2	5	1	1	1	1	1	1	1	0	1	1	2	1	1	1	1	1	1	1	2	1	2	1	1	1	2	1	1	1	1	1	2	1	1	2	1	22	5	2
2	2	2	2	3	3	5	4	3	2	2	15	2	1	2	1	1	1	2	3	1	1	1	1	1	1	1	1	1	0	1	1	2	1	1	1	1	1	1	1	1	1	1	1	2	1	2	20	7	6
2	2	3	2	1	1	5	3	5	3	3	14	1	2	2	3	1	2	2	6	1	1	2	1	1	1	1	1	1	1	1	2	1	1	1	1	2	1	1	1	1	1	2	1	1	1	1	20	7	6
2	2	1	2	3	3	2	2	4	2	2	11	1	2	2	1	1	1	1	2	2	1	1	1	1	1	1	1	1	1	1	1	2	2	1	2	1	1	1	1	1	1	1	2	1	2	1	22	7	7
1	2	3	2	2	1	2	2	1	2	2	5	1	1	1	1	1	1	1	0	1	1	1	1	1	1	1	1	1	0	1	1	1	1	1	1	1	1	1	1	1	1	1	1	1	1	1	17	6	2
2	2	2	2	4	3	3	3	3	3	2	14	1	2	1	1	1	1	1	1	2	1	1	1	1	1	1	1	1	1	2	1	1	1	1	1	1	1	1	1	1	2	1	1	1	3	1	21	9	6
2	2	3	2	2	2	4	2	2	1	1	7	1	1	1	1	1	1	1	0	1	1	1	1	1	1	1	1	1	0	1	1	1	2	1	1	1	2	1	1	1	1	1	1	1	1	1	19	4	4
1	2	3	1	4	3	3	3	2	3	2	13	2	1	2	1	1	1	1	2	1	1	2	1	1	1	1	1	1	1	2	1	1	1	1	1	1	2	2	2	1	1	2	1	1	2	1	23	9	5
2	2	1	2	3	3	4	3	4	3	3	16	3	3	3	3	1	1	1	8	1	1	2	2	1	1	1	1	1	2	2	1	2	2	1	1	1	1	1	1	1	2	1	1	1	1	1	21	9	7
1	2	2	2	1	1	1	2	3	2	2	5	1	1	1	1	1	1	1	0	1	1	4	4	1	1	1	1	1	6	1	1	1	1	1	1	1	1	2	2	2	2	2	2	2	2	2	26	5	4
1	2	4	2	2	2	4	2	2	2	1	8	1	1	1	1	1	1	1	0	1	1	1	1	1	1	1	1	1	0	2	1	2	1	1	1	1	2	1	1	1	2	2	1	1	2	1	23	5	4
2	2	2	2	2	1	3	1	1	1	1	3	2	2	1	1	1	1	2	3	2	1	2	1	1	1	1	1	1	2	2	1	2	2	1	1	1	1	2	1	1	2	3	1	1	3	1	26	4	2
2	2	1	1	3	4	1	4	2	3	3	13	2	1	2	3	1	3	2	7	1	2	1	2	2	1	2	2	1	5	2	2	2	1	2	2	2	5	2	2	1	3	1	2	2	2	2	35	9	6
2	2	2	2	3	3	4	3	4	4	3	17	2	2	2	2	1	1	2	5	2	2	2	2	1	1	3	1	1	6	3	2	3	3	2	1	1	2	2	2	2	1	3	1	2	2	2	34	10	7
2	3	3	2	2	1	3	2	3	3	2	9	2	2	2	2	2	2	2	7	2	2	2	2	2	1	2	2	1	7	1	1	1	2	2	2	2	2	2	1	1	2	2	2	2	2	2	29	7	4
1	3	2	2	2	2	5	3	5	2	3	15	2	1	1	1	1	1	2	2	1	1	2	1	1	1	1	1	1	1	2	1	2	1	1	1	1	1	1	1	1	1	2	1	1	2	1	21	7	7
1	3	2	2	1	2	3	1	1	1	1	3	1	1	1	1	1	1	1	0	1	1	1	1	1	1	1	1	1	0	1	1	1	1	1	1	1	1	1	1	1	1	1	1	1	1	1	17	3	3
2	3	1	2	1	2	4	2	5	3	3	13	1	1	1	1	1	1	1	0	1	1	2	1	1	1	1	1	1	1	1	1	1	1	1	1	1	1	1	1	1	1	1	1	1	2	1	18	7	7
2	3	2	2	1	1	1	1	1	1	1	0	1	1	1	1	1	1	1	0	1	1	1	1	1	1	1	1	1	0	1	1	1	1	1	1	1	1	1	1	1	1	1	1	1	1	1	17	3	2
1	3	3	2	1	1	2	1	1	1	1	1	1	1	1	1	1	1	1	0	1	1	1	1	1	1	1	1	1	0	1	1	1	1	1	1	1	1	1	1	1	1	1	1	1	1	1	17	3	2
2	3	3	2	1	2	3	2	2	2	2	7	1	1	1	1	1	1	1	0	1	1	1	1	1	1	1	1	1	0	1	1	1	1	1	1	1	2	1	1	1	1	1	1	1	1	1	18	5	4
1	3	2	2	3	1	5	4	5	2	1	14	4	3	1	1	1	1	2	6	1	1	1	1	1	1	1	1	1	0	2	2	2	2	1	1	1	1	1	1	1	1	2	1	1	2	1	23	6	6
2	3	3	2	2	1	2	2	3	3	2	8	2	1	2	2	1	1	2	4	2	1	2	1	1	1	1	1	1	2	2	1	1	2	1	2	1	1	1	1	1	1	2	1	1	2	1	22	7	4
2	3	3	2	1	1	1	1	1	1	1	0	1	1	1	1	1	1	1	0	1	1	1	1	1	1	1	1	1	0	1	1	1	1	1	1	1	1	1	1	1	1	1	1	1	1	1	17	3	2
1	3	2	2	2	1	4	5	3	4	3	15	3	4	2	4	3	2	4	15	2	1	3	2	1	1	1	1	1	4	2	1	1	2	1	2	3	4	2	1	2	2	3	1	2	3	1	33	9	4
2	3	3	2	1	1	1	1	1	1	1	0	1	1	1	1	1	1	1	0	1	1	1	1	1	1	1	1	1	0	1	1	1	1	1	1	1	1	1	1	1	1	1	1	1	1	1	17	3	2
2	3	3	2	1	2	1	2	4	1	2	6	1	1	1	1	1	1	1	0	1	1	1	1	1	1	2	1	1	1	2	1	1	2	2	1	1	1	1	2	1	2	2	1	1	2	1	24	4	6
2	3	3	2	5	2	4	3	4	4	3	18	2	3	2	3	2	2	2	9	2	3	3	2	1	1	1	1	1	6	1	1	1	1	1	1	1	1	1	1	1	1	2	1	1	1	1	18	12	6
2	3	2	2	2	2	1	2	1	3	2	6	1	1	2	1	1	1	1	1	1	1	3	2	1	1	1	1	1	3	2	1	1	2	2	3	3	1	1	1	1	1	3	1	1	2	1	27	7	3
2	3	3	2	1	1	3	2	2	1	2	5	1	1	1	1	1	1	1	0	1	1	2	2	1	1	1	1	1	2	1	1	1	1	1	1	1	2	2	1	1	1	2	1	2	2	1	22	4	3
2	3	3	2	1	1	3	1	1	1	1	2	1	1	1	1	1	1	1	0	1	1	1	1	1	1	1	1	1	0	1	1	1	1	1	1	1	1	1	1	1	1	1	1	1	1	1	17	3	2
2	3	3	2	1	1	1	1	1	1	1	0	1	1	1	1	1	1	1	0	1	1	1	1	1	1	1	1	1	0	1	1	2	2	1	1	1	1	1	1	1	1	1	1	1	2	1	20	3	2
2	3	2	2	4	3	3	4	2	3	3	15	2	1	2	1	1	1	2	3	2	1	1	2	1	1	1	1	1	2	2	1	2	2	1	2	2	2	2	2	2	2	2	2	2	3	2	33	10	5
2	3	1	2	2	1	1	2	2	1	1	3	1	1	1	1	1	1	1	0	1	1	1	1	1	1	1	1	1	0	1	1	1	1	1	1	1	1	1	1	1	1	1	1	1	1	1	17	4	3
1	3	1	2	1	1	3	1	3	2	1	5	1	1	1	1	1	1	1	0	1	1	1	1	1	1	1	1	1	0	1	1	1	1	1	2	2	2	1	1	1	1	1	1	1	2	1	21	4	4
1	3	3	2	1	1	1	1	1	1	1	0	1	1	1	1	1	1	1	0	1	1	1	1	1	1	1	1	1	0	1	1	1	1	1	1	1	1	1	1	1	1	1	1	1	1	1	17	3	2
2	3	3	2	2	3	5	2	5	4	2	16	4	4	3	4	4	4	4	20	3	2	2	2	3	2	3	2	1	11	2	1	4	4	2	1	1	1	2	2	2	2	3	2	2	4	2	37	8	8
2	3	2	2	1	1	2	1	3	1	2	4	2	1	2	1	1	1	1	2	1	1	1	1	1	1	1	1	1	0	1	1	2	1	1	2	1	1	1	1	1	1	2	1	1	2	1	21	4	4
2	3	3	2	3	3	3	3	3	3	3	14	1	1	1	1	1	2	2	2	1	1	1	1	2	2	1	2	1	3	2	2	1	2	1	2	2	2	1	1	1	2	3	2	2	3	1	30	9	6
2	3	2	2	3	5	3	2	4	2	2	14	2	1	1	2	1	1	2	3	2	1	2	1	1	1	1	1	1	2	2	2	2	2	1	1	2	2	1	1	1	1	2	1	2	3	1	27	7	9
2	3	2	2	3	2	5	3	4	3	3	16	3	3	3	3	2	2	2	11	2	2	2	3	2	1	1	1	1	6	3	1	1	2	2	2	2	1	1	1	1	1	2	2	2	2	2	28	9	6
1	3	2	2	1	2	3	2	3	3	1	8	3	3	2	2	1	3	3	10	1	3	3	3	1	1	1	1	1	6	2	1	3	2	2	1	1	2	1	3	2	2	1	1	1	2	1	28	5	5
1	3	3	2	3	2	3	3	2	3	3	12	1	1	1	1	3	1	1	2	1	1	1	1	1	1	2	1	1	1	1	1	1	1	1	1	1	1	1	1	1	1	1	1	1	1	1	17	9	4
2	3	2	2	1	1	3	1	2	2	2	5	1	1	1	1	1	1	1	0	1	1	1	1	1	1	1	1	1	0	1	1	1	1	1	1	1	2	1	1	1	1	2	1	1	2	1	20	5	3
1	3	1	2	2	2	4	1	4	2	3	11	1	1	1	1	1	1	1	0	1	1	1	2	1	1	1	1	1	1	2	1	1	1	1	1	1	2	1	2	1	2	2	1	1	2	1	23	7	6
2	3	2	2	1	2	2	1	2	2	2	5	1	1	1	1	1	1	1	0	1	1	1	1	1	1	1	1	1	0	2	1	1	1	2	1	1	1	1	1	1	1	2	1	1	3	1	22	5	4
1	3	3	2	2	1	2	3	3	2	2	8	1	1	1	1	1	1	1	0	1	1	1	1	1	1	1	1	1	0	1	1	1	1	1	1	1	1	1	1	1	1	1	1	1	1	1	17	6	4
2	3	3	2	1	1	1	1	1	3	1	2	2	1	2	1	1	1	2	3	1	1	2	1	1	1	1	1	1	1	1	1	1	1	1	2	1	1	1	1	1	2	2	1	1	2	1	21	5	2
1	3	2	2	2	3	3	2	3	3	3	12	3	2	3	4	3	4	3	15	3	3	3	3	2	1	2	1	1	10	2	2	3	3	2	3	4	3	1	1	1	2	3	1	2	3	1	37	8	6
1	3	3	2	2	1	1	2	2	3	2	6	2	2	1	2	1	1	4	6	1	1	1	1	1	2	2	2	1	3	1	1	2	2	1	1	2	1	1	2	1	2	2	1	2	3	1	26	7	3
2	3	1	2	2	2	3	2	4	3	3	12	1	1	1	1	1	1	2	1	1	1	2	2	1	1	1	1	1	2	2	1	1	2	1	1	1	1	1	1	1	2	2	1	2	2	1	23	8	6
2	3	1	2	1	1	1	1	1	1	1	0	1	1	1	1	1	1	1	0	1	1	2	1	1	1	1	1	1	1	1	1	1	1	1	2	2	2	1	1	1	1	2	1	2	1	1	22	3	2
1	3	1	2	2	2	2	3	2	2	2	8	1	2	2	2	1	1	2	4	1	1	1	1	1	1	1	1	1	0	2	1	1	1	1	1	1	1	1	1	1	1	1	1	1	1	1	18	6	4
1	3	2	2	1	1	3	1	1	1	1	2	1	1	1	1	1	1	1	0	1	1	1	1	1	1	1	1	1	0	1	1	1	1	1	1	1	1	1	1	1	1	1	1	1	1	1	17	3	2
2	3	1	2	1	2	4	2	3	2	2	9	1	1	1	1	1	1	1	0	1	1	1	1	1	1	1	1	1	0	1	1	1	1	1	1	1	1	1	1	1	1	1	1	1	1	1	17	5	5
2	3	2	2	2	1	2	4	4	4	2	12	2	1	2	1	1	1	2	3	1	2	1	2	1	1	1	1	1	2	1	1	1	2	1	3	5	1	1	2	1	1	1	1	1	3	2	28	8	5
2	3	1	2	1	1	1	1	1	1	1	0	1	1	1	1	1	1	1	0	1	1	1	1	1	1	1	1	1	0	1	1	1	1	1	1	1	1	1	1	1	1	1	1	1	2	1	18	3	2
2	3	2	2	3	2	4	3	2	3	3	13	2	3	2	2	2	1	2	7	1	1	1	1	1	1	1	1	1	0	2	1	2	1	1	2	2	2	2	2	1	1	1	1	1	2	2	26	9	4
2	3	2	2	3	3	3	2	2	3	2	11	2	2	2	1	1	1	1	3	1	1	1	1	1	1	1	1	1	0	2	1	1	2	1	1	1	2	1	1	1	1	1	1	1	1	1	20	8	5
2	3	2	2	1	1	1	1	1	1	1	0	1	1	1	1	1	1	2	1	1	1	1	1	1	1	1	1	1	0	1	1	1	2	1	2	2	1	1	1	1	1	1	1	1	2	1	21	3	2
2	3	3	2	1	2	5	2	3	3	2	11	1	2	1	1	1	1	1	1	2	2	2	1	1	1	2	1	1	4	2	1	2	2	2	1	1	1	1	1	1	2	2	1	2	2	1	25	6	5
2	3	3	2	1	1	1	1	1	1	1	0	1	1	1	1	1	1	1	0	1	1	1	1	1	1	1	1	1	0	1	1	1	1	1	1	1	1	1	1	1	1	1	1	1	1	1	17	3	2
1	3	3	2	1	1	5	1	1	1	1	4	1	1	1	1	1	1	1	0	1	1	1	1	1	1	1	1	1	0	2	1	1	1	1	1	1	1	2	1	1	1	2	1	1	1	1	20	3	2
1	3	3	2	1	1	1	1	1	1	1	0	1	1	1	1	1	1	1	0	1	1	1	1	1	1	1	1	1	0	1	1	1	1	1	1	1	1	1	1	1	1	1	1	1	1	1	17	3	2
2	3	3	2	2	1	4	2	4	2	2	10	1	1	1	1	1	1	1	0	1	1	2	1	1	1	1	1	1	1	2	1	2	1	1	1	1	1	1	1	1	1	2	1	1	1	1	20	6	5
2	3	3	2	2	2	5	2	2	3	2	11	2	1	2	1	1	1	1	2	1	1	2	2	3	1	1	1	1	4	1	1	1	2	1	1	1	1	1	1	1	2	2	1	1	2	1	21	7	4
2	3	2	2	5	4	4	5	4	4	3	22	3	4	3	4	1	2	2	12	1	1	3	1	1	1	1	1	1	2	1	1	1	1	1	1	1	1	1	1	1	1	2	1	1	2	1	19	12	8
1	3	2	2	2	3	4	2	5	2	2	13	1	1	4	2	1	1	2	5	1	1	2	2	1	1	1	1	1	2	2	1	2	2	1	1	1	1	2	2	1	1	2	1	4	4	1	29	6	8
2	3	2	2	3	2	3	3	3	3	3	13	1	1	1	1	1	1	1	0	1	1	2	2	1	1	2	1	1	3	1	1	1	1	1	1	1	1	1	1	1	1	2	2	1	2	1	20	9	5
2	3	3	2	3	2	4	3	5	2	1	13	2	4	3	2	2	2	3	11	2	2	4	4	4	1	4	2	1	15	2	3	2	3	2	3	4	1	2	4	1	2	5	4	3	4	1	46	6	7
1	3	3	2	3	1	3	2	3	3	2	10	1	1	2	1	1	1	2	2	1	1	1	1	1	1	1	1	1	0	1	1	2	2	1	1	1	1	1	1	1	2	2	1	1	2	1	22	8	4
1	3	1	2	1	1	1	1	1	1	1	0	1	1	1	1	1	1	1	0	1	1	1	1	1	1	1	1	1	0	1	1	1	1	1	1	1	1	1	1	1	1	1	1	1	1	1	17	3	2
1	3	3	2	1	1	2	2	1	2	1	3	1	4	1	1	1	1	1	3	1	1	1	1	1	1	1	1	1	0	2	1	2	1	2	1	1	1	1	1	1	1	1	1	1	2	1	21	4	2
1	3	2	2	2	2	2	2	2	2	2	7	2	1	1	1	1	1	1	1	1	1	1	1	1	1	1	1	1	0	1	1	1	1	1	1	1	1	1	1	1	1	1	1	1	2	1	18	6	4
2	3	2	2	4	1	1	1	1	2	2	5	2	1	1	1	2	1	1	2	1	1	1	1	1	1	1	1	1	0	2	1	1	1	1	1	1	1	1	2	1	1	1	1	1	1	1	19	8	2
1	3	2	2	3	1	4	2	4	3	2	12	1	3	3	4	4	1	1	10	1	1	1	1	1	1	1	1	1	0	2	1	1	4	1	2	1	1	1	2	1	1	1	1	1	1	1	23	8	5
1	3	2	2	1	1	2	2	3	3	3	8	1	1	1	2	1	1	1	1	1	1	1	2	1	1	1	1	1	1	2	1	2	2	1	1	1	1	1	2	1	2	1	1	1	2	1	23	7	4
1	3	3	2	3	3	3	3	4	3	3	15	2	2	2	2	2	2	1	6	1	1	1	1	1	1	1	1	1	0	1	1	2	2	1	1	1	1	1	2	2	2	1	1	1	1	1	22	9	7
2	3	3	2	4	2	4	3	3	4	3	16	3	1	1	1	1	2	2	4	1	1	1	1	1	2	1	1	1	1	2	2	2	1	1	2	2	1	1	2	1	2	1	1	1	2	1	25	11	5
1	3	3	2	1	1	1	2	4	3	3	8	3	3	3	3	2	3	3	13	2	2	4	3	2	1	1	3	1	10	2	3	2	4	3	2	2	2	1	3	1	2	3	3	2	3	4	42	7	5
2	3	3	2	2	1	3	3	3	4	4	13	3	3	3	3	2	2	2	11	2	1	3	2	1	1	1	1	1	4	2	2	2	2	1	3	3	2	1	2	1	1	4	2	2	3	2	35	10	4
2	3	3	2	1	2	4	2	3	2	2	9	3	2	2	2	1	1	3	7	1	1	2	2	3	3	1	1	1	6	3	2	2	5	1	1	1	1	2	2	1	2	3	1	2	3	1	33	5	5
1	3	2	2	2	1	3	2	3	2	2	8	1	3	2	1	1	1	2	4	1	1	2	1	1	1	1	1	1	1	2	2	2	2	1	1	1	1	1	1	1	1	1	1	1	1	1	21	6	4
2	1	1	2	3	1	3	1	1	1	1	4	1	1	1	1	1	1	1	0	1	1	1	1	1	1	1	1	1	0	1	1	1	1	1	2	1	1	1	1	1	1	1	1	1	2	1	19	5	2
2	1	1	2	1	1	1	1	1	1	1	0	1	1	1	1	1	1	1	0	1	1	1	1	1	1	1	1	1	0	1	1	1	1	1	1	1	1	1	1	1	1	1	1	1	1	1	17	3	2
1	1	3	2	1	1	1	1	1	1	1	0	1	1	1	1	1	1	1	0	1	1	1	1	1	1	1	1	1	0	1	1	1	1	1	1	1	1	1	1	1	1	1	1	1	1	1	17	3	2
2	1	3	2	3	2	2	1	1	2	1	5	1	2	2	2	1	1	2	4	2	1	3	3	2	1	1	1	1	6	1	1	2	2	1	1	1	1	2	1	1	2	3	1	2	2	1	25	6	3
2	1	3	2	2	2	2	2	3	3	3	10	2	2	2	2	1	2	2	6	1	1	1	2	4	1	1	2	1	5	2	2	3	3	2	1	1	1	1	1	1	2	1	2	2	2	2	29	8	5
1	1	3	2	2	1	2	2	2	2	2	6	2	2	2	2	2	2	2	7	1	1	1	1	1	1	1	1	1	0	1	1	1	1	1	1	2	1	1	1	1	1	1	1	1	1	1	18	6	3
1	2	3	2	3	3	4	4	3	3	2	15	2	2	2	2	1	1	2	5	1	2	2	1	1	1	1	1	1	2	2	2	2	2	1	1	1	2	1	1	1	2	2	1	2	3	2	28	8	6
2	1	3	2	2	2	2	2	2	2	2	7	1	1	1	1	1	1	1	0	1	1	3	3	1	1	1	1	1	4	1	1	1	1	1	1	1	2	1	2	1	1	2	1	1	2	1	21	6	4
1	1	3	2	1	1	2	1	1	1	1	1	1	1	1	1	1	1	1	0	1	1	1	1	1	1	1	1	1	0	1	1	1	1	1	1	1	1	1	1	1	1	1	1	1	1	1	17	3	2
2	1	3	2	1	1	3	1	1	1	1	2	1	1	1	1	1	1	1	0	1	1	1	1	1	1	1	1	1	0	1	1	1	1	1	1	1	1	1	1	1	1	1	1	1	1	1	17	3	2
2	1	3	2	1	1	2	2	3	2	1	5	1	1	1	1	1	1	1	0	3	2	2	2	2	2	2	1	1	8	2	1	2	1	1	1	1	1	2	2	2	2	3	3	3	3	2	32	4	4
2	2	3	2	3	2	2	1	2	3	2	8	2	1	1	1	1	1	1	1	3	2	1	2	2	1	1	1	1	5	1	1	1	1	1	1	1	1	2	1	1	1	1	1	1	1	1	18	8	4
2	1	3	2	3	1	3	1	1	1	1	4	1	1	1	1	1	1	1	0	1	1	1	1	1	1	1	1	1	0	1	1	2	1	1	1	1	1	1	1	1	1	1	1	1	1	1	18	5	2
1	1	3	2	3	2	3	2	3	3	3	12	2	1	2	1	2	2	2	5	1	1	2	2	1	1	1	1	1	2	2	1	2	2	2	2	2	1	2	2	1	1	2	2	2	2	2	30	9	5
2	1	2	2	2	2	4	5	2	3	3	14	2	2	2	1	1	1	2	4	1	1	1	1	1	1	1	1	1	0	1	1	2	2	1	1	1	1	1	2	1	1	1	1	2	2	2	23	8	4
1	1	3	2	2	3	2	1	2	2	1	6	1	1	1	1	1	1	1	0	1	1	1	1	1	1	1	1	1	0	1	1	1	1	1	1	1	1	1	1	1	1	1	1	1	2	1	18	5	5
2	2	3	2	2	2	2	2	1	2	1	5	1	1	1	1	1	1	1	0	1	1	1	1	1	1	1	1	1	0	1	1	1	1	1	1	1	1	1	1	1	1	1	1	1	1	1	17	5	3
2	1	3	2	3	2	2	3	3	3	2	11	2	2	2	1	2	2	1	5	2	1	2	2	1	1	1	1	1	3	1	1	2	1	1	1	1	1	2	1	1	1	1	1	2	1	1	20	8	5
1	1	3	2	1	2	3	1	1	3	1	5	1	2	2	1	1	2	2	4	1	2	1	2	2	2	1	1	1	4	1	1	2	2	1	1	1	1	2	2	1	2	3	2	1	2	2	27	5	3
2	1	3	2	2	2	1	1	1	1	1	2	2	1	1	1	1	2	2	3	1	1	1	1	1	1	1	1	1	0	1	1	2	2	1	1	1	1	1	2	1	1	1	2	1	3	1	23	4	3
2	1	3	2	1	2	3	2	1	1	1	4	2	2	3	2	2	2	1	7	1	2	3	2	1	2	2	2	2	8	2	1	2	2	1	1	2	2	2	3	2	2	3	2	2	2	1	32	3	3
2	1	3	2	3	3	3	2	2	2	2	10	2	2	1	1	2	2	1	4	1	2	2	1	2	2	2	2	1	6	1	1	2	2	1	1	2	3	1	2	1	1	2	2	2	1	1	26	7	5
2	1	3	2	1	1	2	1	1	1	1	1	1	1	1	1	1	1	1	0	1	1	1	1	1	1	1	1	1	0	1	1	1	1	1	1	1	1	1	1	1	1	1	1	1	1	1	17	3	2
2	1	2	2	1	1	4	2	1	3	1	6	1	1	1	1	1	1	1	0	1	1	1	1	1	1	1	1	1	0	1	1	1	1	1	1	1	1	1	2	1	1	2	1	1	2	1	20	5	2
2	1	3	2	2	3	2	3	2	1	3	9	2	2	2	2	2	2	2	7	2	1	2	2	2	2	1	1	1	5	2	1	2	2	2	2	2	3	2	2	2	2	3	3	3	2	2	37	6	5
2	1	2	2	3	4	3	3	3	3	3	15	1	1	1	1	2	1	1	1	1	1	2	1	1	1	1	1	1	1	2	1	2	1	5	1	1	2	2	2	1	1	1	1	1	2	1	27	9	7
2	1	2	2	1	2	2	2	1	1	1	3	1	1	1	1	1	1	1	0	1	1	1	1	1	1	1	1	1	0	1	1	1	1	1	1	1	1	1	1	1	1	2	1	1	1	1	18	3	3
2	1	1	1	1	2	4	3	5	3	3	14	1	1	1	1	1	3	3	4	1	2	2	1	1	3	1	1	1	4	1	1	2	2	1	2	2	2	1	1	1	2	2	2	1	4	2	29	7	7
2	1	4	2	2	1	2	2	2	2	2	6	1	2	1	1	1	2	1	2	2	2	2	2	2	2	2	2	1	8	1	1	1	2	2	2	2	1	1	2	1	2	2	2	2	2	2	28	6	3
2	1	3	2	2	1	3	1	2	2	2	6	2	1	2	2	1	2	1	4	2	2	1	2	1	2	1	2	1	5	2	1	1	2	1	2	2	2	2	2	1	2	1	2	1	1	1	26	6	3
2	1	3	1	3	1	2	1	1	1	1	3	1	1	1	1	1	1	1	0	1	2	2	2	1	1	1	1	1	3	1	1	1	1	1	2	2	2	1	3	1	1	1	1	1	1	1	22	5	2
2	1	1	2	3	3	3	1	2	2	2	9	1	1	1	1	1	1	1	0	1	1	1	1	1	1	1	1	1	0	1	1	1	1	1	1	1	1	1	1	1	1	1	1	1	1	1	17	7	5
1	1	4	2	1	1	5	1	1	1	1	4	1	1	1	1	1	1	1	0	1	1	1	1	1	1	1	1	1	0	1	1	1	1	1	1	1	1	1	1	1	1	1	1	1	1	1	17	3	2
2	2	3	1	3	1	2	4	5	3	2	13	1	1	1	1	1	1	1	0	2	1	1	1	1	1	1	1	1	1	2	1	1	1	1	1	2	2	2	2	2	2	1	1	1	2	1	25	8	6
1	2	1	2	1	1	3	2	3	3	2	8	1	1	1	1	1	1	1	0	2	1	2	2	2	1	1	1	1	4	2	1	1	1	1	1	1	2	1	1	1	1	1	1	1	2	1	20	6	4
1	1	3	2	4	2	4	3	5	3	2	16	2	2	2	2	2	2	3	8	3	2	2	3	2	3	2	3	1	12	3	2	2	2	2	3	3	3	2	2	3	1	2	4	3	3	2	42	9	7
1	1	3	2	1	1	1	1	1	1	1	0	1	1	1	1	1	1	1	0	1	1	1	1	1	1	1	1	1	0	1	1	1	1	1	1	1	1	1	1	1	1	1	1	1	1	1	17	3	2
2	1	3	2	1	1	1	1	1	1	1	0	1	1	1	1	1	2	1	1	1	1	1	2	1	1	2	1	1	2	1	1	1	1	1	1	1	1	1	1	1	1	1	2	2	1	1	19	3	2
1	1	3	1	5	3	4	4	4	4	4	21	3	3	3	2	1	1	1	7	1	1	1	1	1	1	1	1	1	0	2	1	1	2	2	2	2	2	1	1	1	1	1	1	1	1	1	23	13	7
1	1	3	2	3	3	2	2	2	3	3	11	2	1	2	2	1	2	2	5	2	1	3	3	2	1	2	2	1	8	2	1	2	2	1	1	1	1	1	1	1	1	3	2	2	2	1	25	9	5
1	1	1	2	5	3	4	3	3	2	2	15	1	1	1	1	1	1	1	0	1	1	1	1	1	2	1	1	1	1	1	1	2	1	1	1	1	2	1	2	1	1	1	1	1	1	1	20	9	6
2	2	2	2	3	3	4	3	3	3	3	15	2	2	2	2	2	2	2	7	2	2	3	2	3	2	2	2	1	10	2	3	2	2	2	3	3	2	2	2	2	2	2	2	2	2	2	37	9	6
2	2	3	2	3	3	5	3	5	3	3	18	2	3	3	3	2	2	3	11	3	3	3	3	2	2	2	2	3	14	4	2	2	3	4	2	3	2	2	2	2	3	3	2	2	2	2	42	9	8
1	2	1	2	3	2	4	4	4	3	3	16	2	1	3	2	3	2	3	9	4	3	4	1	1	3	2	2	1	12	1	1	2	2	3	2	3	1	2	3	3	1	2	1	2	3	1	33	9	6
2	2	3	2	2	2	3	2	2	3	3	10	2	1	1	1	1	1	2	2	1	1	2	1	2	1	1	1	1	2	2	1	2	2	2	1	1	1	1	1	1	1	1	1	1	2	1	22	8	4
1	2	3	2	3	3	3	4	4	4	3	17	3	3	3	3	2	3	3	13	3	3	3	3	3	3	3	3	3	18	3	2	3	3	2	3	3	2	3	4	4	3	3	3	3	3	3	50	10	7
1	2	2	2	2	3	3	1	4	5	4	15	2	1	2	2	1	1	1	3	2	1	4	4	1	1	1	1	1	7	1	2	1	2	1	2	2	1	2	1	1	2	2	1	1	2	2	26	11	7
2	2	1	2	3	2	3	3	4	3	3	14	3	3	3	3	1	3	3	12	2	1	3	2	2	3	1	2	1	8	2	1	1	2	1	1	1	1	1	2	2	2	2	2	2	2	1	26	9	6
2	2	3	2	1	1	2	2	2	2	1	4	1	2	1	1	1	1	1	1	2	2	2	2	2	1	1	1	1	5	2	1	2	2	1	2	2	1	1	1	1	1	2	2	2	2	2	27	4	3
2	2	3	2	3	2	5	3	4	2	3	15	2	1	2	2	1	2	2	5	2	2	3	3	3	1	2	1	1	9	2	2	2	2	2	1	1	2	2	2	2	2	2	2	2	2	2	32	8	6
2	2	3	2	1	2	4	5	5	4	2	16	3	4	3	1	1	2	2	9	4	3	3	3	4	3	3	1	2	17	3	2	2	2	2	1	3	2	3	4	3	4	4	4	3	2	3	47	7	7
2	2	3	2	1	1	3	1	3	3	1	6	1	1	2	1	1	1	4	4	1	1	1	1	1	1	1	1	1	0	1	1	2	2	1	1	1	1	1	1	1	2	1	1	1	1	1	20	5	4
2	2	3	2	2	1	4	3	3	3	3	12	2	1	1	1	1	1	1	1	1	1	1	1	1	1	1	1	1	0	1	1	1	2	1	1	1	1	1	1	1	1	1	2	1	2	1	20	8	4
1	2	3	2	2	2	4	2	3	3	2	11	1	1	1	1	1	1	1	0	1	1	1	1	1	1	1	1	1	0	1	1	1	1	1	2	2	2	1	1	1	1	1	1	1	2	1	21	7	5
2	2	3	2	1	1	3	1	5	1	3	8	1	1	1	1	1	1	1	0	1	1	1	1	1	1	1	1	1	0	1	1	1	1	1	1	1	2	1	2	1	1	1	1	1	2	1	20	5	6
2	2	3	2	2	2	3	2	4	2	2	10	1	1	1	1	1	1	1	0	1	1	1	1	1	1	1	1	1	0	2	1	2	2	1	2	2	1	1	1	1	1	2	1	1	2	1	24	6	6
2	3	2	2	4	1	1	1	2	1	1	4	1	1	1	1	1	1	1	0	1	1	1	1	1	1	1	1	1	0	1	1	1	1	1	1	1	1	1	1	1	1	1	1	1	1	1	17	6	3
2	3	2	2	1	1	2	2	3	3	3	8	2	1	1	1	1	1	1	1	1	1	1	1	1	1	1	1	1	0	2	1	1	1	1	1	1	1	1	2	1	1	2	1	1	2	1	21	7	4
2	3	3	2	3	2	4	2	5	3	2	14	2	2	1	1	1	1	2	3	2	1	2	2	1	1	2	1	1	4	2	1	2	2	1	2	3	3	1	2	2	2	2	1	2	2	1	31	8	7
2	3	1	2	3	2	4	3	2	3	3	13	3	2	1	1	1	1	1	3	1	1	1	1	1	1	1	1	1	0	2	1	2	2	1	2	1	2	1	1	1	2	1	1	1	2	1	24	9	4
2	3	2	1	4	3	5	3	3	3	2	16	2	1	4	4	1	3	3	11	4	3	4	4	3	4	3	3	3	22	2	1	2	2	1	1	1	1	1	1	1	2	4	1	1	2	1	25	9	6
2	3	2	2	1	2	3	3	2	2	1	7	1	1	1	1	1	1	1	0	1	1	1	1	1	1	1	1	1	0	1	1	1	1	1	1	1	1	1	1	1	1	1	1	1	2	1	18	4	4
1	3	3	2	4	3	5	4	4	2	3	18	1	3	4	4	3	3	4	15	4	3	4	4	3	1	1	2	1	14	2	1	2	2	2	2	2	1	2	2	1	1	4	2	2	3	1	32	9	7
1	3	3	2	1	2	2	2	2	3	3	8	1	1	2	1	1	1	2	2	1	1	1	1	1	1	1	1	1	0	2	1	1	2	1	2	2	1	1	1	1	1	1	1	1	2	1	22	7	4
2	3	3	1	3	3	4	3	4	4	4	18	3	2	3	3	3	2	2	11	3	1	2	3	2	1	2	2	1	8	3	2	2	2	1	2	2	1	2	2	2	2	3	1	3	2	2	34	11	7
1	2	3	2	2	4	4	2	4	3	2	14	3	1	2	1	1	1	2	4	1	2	1	2	1	2	2	1	1	4	2	1	2	2	1	2	2	3	1	1	1	1	1	1	1	2	1	25	7	8
1	1	1	2	1	2	3	4	1	2	1	7	1	1	1	1	1	1	1	0	1	1	1	1	1	1	1	1	1	0	1	1	1	1	1	1	1	1	1	1	1	1	1	1	1	1	1	17	4	3
1	3	2	2	1	3	2	3	3	3	3	11	1	1	1	1	1	1	1	0	1	1	1	1	1	1	1	1	1	0	2	1	2	1	1	2	2	2	1	2	1	1	2	1	1	2	1	25	7	6
2	2	1	2	1	2	3	1	2	2	2	6	1	1	1	1	1	1	1	0	1	1	3	1	1	1	1	1	1	2	1	2	1	1	1	1	1	1	1	1	1	1	2	1	1	1	1	19	5	4
2	2	2	2	2	3	3	3	4	3	3	14	2	2	2	2	1	1	2	5	1	1	2	1	1	1	1	1	1	1	1	1	2	2	1	2	2	2	1	2	1	1	2	1	1	2	1	25	8	7
[truncated: 10 more columns]
